# Supplementary material for: One pot transamidation of N-pivaloyl activated amides with anilines in the absence of catalyst, base and additive
Source: Royal Society of Chemistry journal article supplement (doi:10.1039/d3nj01490h), 2023-01-01
Supplement: d3nj01490h2.pdf [file d3nj01490h2.pdf]

## Supporting Information

### One pot transamidation of N-pivaloyl activated amides with anilines in the absence of catalyst, base, and additive

*Ida Angel Priya Samuel Rajan and Saravanakumar Rajendran\**

*Chemistry Division, Vellore Institute of Technology Chennai campus, Vandalur-Kelambakkam road, Chennai – 600127, Tamil Nadu, India.*

\*Corresponding Author & E-mail id: [sar.org@gmail.com](mailto:sar.org@gmail.com) & [Saravanakumar.r@vit.ac.in](mailto:Saravanakumar.r@vit.ac.in)

#### Table of Contents

|                                                                             |    |
|-----------------------------------------------------------------------------|----|
| 1. Materials and methods -----                                              | 4  |
| 2. Synthesis of <i>N</i> -pivaloyl benzamide ( <b>1</b> ) -----             | 5  |
| 3. Single crystal X-ray structure of <i>N</i> -pivaloyl benzamide-----      | 5  |
| 4. Synthesis of 4-nitrobenzamide -----                                      | 6  |
| 5. Synthesis of 4-methoxybenzamide-----                                     | 6  |
| 6. Synthesis of 4-chlorobenzamide-----                                      | 7  |
| 7. Synthesis of 4- methylbenzamide-----                                     | 7  |
| 8. Synthesis of cinnamamide-----                                            | 8  |
| 9. Synthesis of 4-methoxycinnamic amide-----                                | 9  |
| 10. Synthesis of piperic amide-----                                         | 9  |
| 11. Synthesis of <i>N</i> -methyl benzamide-----                            | 10 |
| 12. Synthesis of <i>N</i> -phenylbenzamide( <b>3</b> ) -----                | 14 |
| 13. Synthesis of <i>N</i> -( <i>p</i> -tolyl)benzamide( <b>4</b> ) -----    | 15 |
| 14. Synthesis of <i>N</i> -(2,6-dimethylphenyl)benzamide( <b>5</b> ) -----  | 16 |
| 15. Synthesis of <i>N</i> -(4-hydroxyphenyl)benzamide( <b>6</b> ) -----     | 16 |
| 16. Synthesis of <i>N</i> -(2-hydroxyphenyl)benzamide( <b>7</b> ) -----     | 17 |
| 17. Synthesis of <i>N</i> -(4-methoxyphenyl)benzamide( <b>8</b> ) -----     | 18 |
| 18. Synthesis of <i>N</i> -(4-fluorophenyl)benzamide( <b>9</b> ) -----      | 18 |
| 19. Synthesis of <i>N</i> -(3,4-dichlorophenyl)benzamide( <b>10</b> ) ----- | 19 |

|                                                                                                                                                         |    |
|---------------------------------------------------------------------------------------------------------------------------------------------------------|----|
| 20. Synthesis of <i>N</i> -(4-bromophenyl)benzamide( <b>11</b> ) -----                                                                                  | 20 |
| 21. Synthesis of <i>N</i> -(4-cyanophenyl)benzamide( <b>12</b> ) -----                                                                                  | 20 |
| 22. Synthesis of 4-benzamidobenzoic acid( <b>13</b> ) -----                                                                                             | 21 |
| 23. Synthesis of <i>N</i> -(4-nitrophenyl)benzamide( <b>14</b> ) -----                                                                                  | 22 |
| 24. Synthesis of <i>N</i> -(4-acetylphenyl)benzamide( <b>15</b> ) -----                                                                                 | 22 |
| 25. Synthesis of <i>N</i> -(2-(3-chlorobenzoyl)phenyl)benzamide( <b>16</b> ) -----                                                                      | 23 |
| 26. Synthesis of <i>N</i> -(2-carbamoylphenyl)benzamide( <b>17</b> ) -----                                                                              | 24 |
| 27. Synthesis of <i>N</i> -(naphthalen-1-yl)benzamide( <b>18</b> ) -----                                                                                | 24 |
| 28. Synthesis of <i>N</i> -(thiazol-2-yl)benzamide( <b>19</b> ) -----                                                                                   | 25 |
| 29. Synthesis of <i>N</i> -methyl- <i>N</i> -phenylbenzamide( <b>20</b> ) -----                                                                         | 26 |
| 30. Synthesis of <i>N</i> -(4-methoxyphenyl)acetamide( <b>21</b> ) -----                                                                                | 28 |
| 31. Synthesis of 4-chloro- <i>N</i> -(4-methoxyphenyl)benzamide( <b>22</b> ) -----                                                                      | 28 |
| 32. Synthesis of <i>N</i> -(4-methoxyphenyl)-4-nitrobenzamide( <b>23</b> ) -----                                                                        | 29 |
| 33. Synthesis of 4-methoxy- <i>N</i> -(4-methoxyphenyl)benzamide( <b>24</b> ) -----                                                                     | 29 |
| 34. Synthesis of <i>N</i> -(4-methoxyphenyl)cinnamamide( <b>25</b> ) -----                                                                              | 30 |
| 35. Synthesis of (2 <i>E</i> ,4 <i>E</i> )-5-(benzo[ <i>d</i> ][1,3]dioxol-5-yl)- <i>N</i> -(4-methoxyphenyl)penta-2,4-<br>dienamide( <b>26</b> ) ----- | 31 |
| 36. Transamidation of <i>N</i> -methyl benzamide with 4-methoxy aniline-----                                                                            | 32 |
| 37. Synthesis of 4-methyl <i>N</i> -pivaloyl benzamide ( <b>27</b> ) -----                                                                              | 32 |
| 38. Synthesis of <i>N</i> -methyl <i>N</i> -pivaloyl benzamide ( <b>28</b> ) -----                                                                      | 33 |
| 39. Competitive study-I -----                                                                                                                           | 34 |
| 40. GC-MS Spectral data of the selectivity study I-----                                                                                                 | 35 |
| 41. Stability study of <i>N</i> -pivaloyl benzamide -----                                                                                               | 36 |
| 42. Reference-----                                                                                                                                      | 37 |
| 43. <sup>1</sup> H and <sup>13</sup> C NMR spectra of ( <b>1</b> ) -----                                                                                | 38 |
| 44. <sup>1</sup> H and <sup>13</sup> C NMR spectra of 4-nitrobenzamide -----                                                                            | 39 |
| 45. <sup>1</sup> H and <sup>13</sup> C NMR spectra of 4-methoxybenzamide-----                                                                           | 40 |
| 46. <sup>1</sup> H and <sup>13</sup> C NMR spectra of 4- chlorobenzamide-----                                                                           | 41 |
| 47. <sup>1</sup> H and <sup>13</sup> C NMR spectra of 4- methylbenzamide-----                                                                           | 42 |
| 48. <sup>1</sup> H and <sup>13</sup> C NMR spectra of cinnamamide-----                                                                                  | 43 |
| 49. <sup>1</sup> H and <sup>13</sup> C NMR spectra of 4-methoxycinnamic amide-----                                                                      | 44 |

|                                                                                      |    |
|--------------------------------------------------------------------------------------|----|
| 50. $^1\text{H}$ and $^{13}\text{C}$ NMR spectra of piperic amide-----               | 45 |
| 51. $^1\text{H}$ and $^{13}\text{C}$ NMR spectra of <i>N</i> -methyl benzamide-----  | 46 |
| 52. $^1\text{H}$ and $^{13}\text{C}$ NMR spectra of <b>(3)</b> -----                 | 47 |
| 53. $^1\text{H}$ and $^{13}\text{C}$ NMR spectra of <b>(4)</b> -----                 | 48 |
| 54. $^1\text{H}$ and $^{13}\text{C}$ NMR spectra of <b>(5)</b> -----                 | 49 |
| 55. $^1\text{H}$ and $^{13}\text{C}$ NMR spectra of <b>(6)</b> -----                 | 50 |
| 56. $^1\text{H}$ and $^{13}\text{C}$ NMR spectra of <b>(7)</b> -----                 | 51 |
| 57. $^1\text{H}$ and $^{13}\text{C}$ NMR spectra of <b>(8)</b> -----                 | 52 |
| 58. $^1\text{H}$ and $^{13}\text{C}$ NMR spectra of <b>(9)</b> -----                 | 53 |
| 59. $^1\text{H}$ and $^{13}\text{C}$ NMR spectra of <b>(10)</b> -----                | 54 |
| 60. $^1\text{H}$ and $^{13}\text{C}$ NMR spectra of <b>(11)</b> -----                | 55 |
| 61. $^1\text{H}$ and $^{13}\text{C}$ NMR spectra of <b>(12)</b> -----                | 56 |
| 62. $^1\text{H}$ and $^{13}\text{C}$ NMR spectra of <b>(13)</b> -----                | 57 |
| 63. $^1\text{H}$ and $^{13}\text{C}$ NMR spectra of <b>(14)</b> -----                | 58 |
| 64. $^1\text{H}$ and $^{13}\text{C}$ NMR spectra of <b>(15)</b> -----                | 59 |
| 65. $^1\text{H}$ and $^{13}\text{C}$ NMR spectra of <b>(16)</b> -----                | 60 |
| 66. $^1\text{H}$ and $^{13}\text{C}$ NMR spectra of <b>(17)</b> -----                | 61 |
| 67. $^1\text{H}$ and $^{13}\text{C}$ NMR spectra of <b>(18)</b> -----                | 62 |
| 68. $^1\text{H}$ and $^{13}\text{C}$ NMR spectra of <b>(19)</b> -----                | 63 |
| 69. $^1\text{H}$ and $^{13}\text{C}$ NMR spectra of <b>(20)</b> -----                | 64 |
| 70. $^1\text{H}$ and $^{13}\text{C}$ NMR spectra of <b>(21)</b> -----                | 65 |
| 71. $^1\text{H}$ and $^{13}\text{C}$ NMR spectra of <b>(22)</b> -----                | 66 |
| 72. $^1\text{H}$ and $^{13}\text{C}$ NMR spectra of <b>(23)</b> -----                | 67 |
| 73. $^1\text{H}$ and $^{13}\text{C}$ NMR spectra of <b>(24)</b> -----                | 68 |
| 74. $^1\text{H}$ and $^{13}\text{C}$ NMR spectra of <b>(25)</b> -----                | 69 |
| 75. $^1\text{H}$ and $^{13}\text{C}$ NMR spectra of <b>(26)</b> -----                | 70 |
| 76. $^1\text{H}$ and $^{13}\text{C}$ NMR spectra of <b>(27)</b> -----                | 71 |
| 77. $^1\text{H}$ and $^{13}\text{C}$ NMR spectra of <b>(28)</b> -----                | 72 |
| 78. $^1\text{H}$ and $^{13}\text{C}$ NMR spectra of <b>(COMPETITIVE STUDY)</b> ----- | 73 |

## 1. Materials and methods

### *Materials*

All commercially obtained reagents/solvents were used as received; chemicals were purchased from Spectrochem<sup>®</sup>, SRL<sup>®</sup>, Acros Organics<sup>®</sup>, RANKEM<sup>®</sup>, Fisher Scientific<sup>®</sup>, and used as received without further purification. Unless stated otherwise, reactions were conducted in oven-dried glassware and under normal atmospheric conditions. <sup>1</sup>H NMR and <sup>13</sup>C NMR spectra were recorded on Bruker 400 MHz spectrometer operating with the <sup>13</sup>C resonance frequency of 100 MHz and proton resonance frequency of 400 MHz. Data from the <sup>1</sup>H NMR spectroscopy are reported as chemical shift ( $\delta$  ppm) with the corresponding integration values. Coupling constants ( $J$ ) are reported in hertz (Hz). Standard abbreviations indicating multiplicity were used as follows: s (singlet), br (broad), d (doublet), t (triplet), q (quartet) and m (multiplet). Data from <sup>13</sup>C NMR spectra are reported in terms of chemical shift ( $\delta$  ppm). High-resolution mass spectra were recorded on Electrospray Ionization mode on WATERS- XEVO G2-XS-QToS mass spectrometer in positive (ESI+) ion mode. Mass spectra were recorded on Perkin Elmer Clarus 600/Shimadzu QP2020 GC-MS spectrometer in EI mode. Melting points were recorded with REMI DDMS 2545. The instrument is calibrated with benzoic acid before the measurement.

### *Abbreviation used in this supporting information*

DCM – Dichloromethane

DMF – Dimethyl formamide

THF – Tetrahydrofuran

TEA – Triethyl amine

EtOAc – Ethyl acetate

RT – Room temperature

## Synthesis of *N*-pivaloyl benzamide

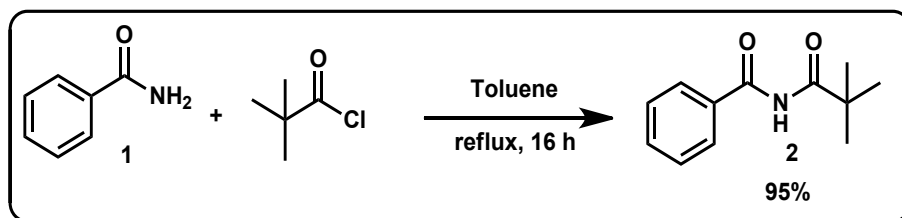

To a stirred solution of benzamide (1 g, 8.23 mmol), in 20 mL of toluene at room temperature, pivaloyl chloride (991 mg, 8.23 mmol) was added dropwise. After addition, the reaction mixture was refluxed for 16 h. Progress of the reaction was monitored by TLC [hexane-EtOAc (7:3)]. After completion, the reaction mixture was washed with 5% NaHCO<sub>3</sub> solution (2 x 50 mL) and water (1 x 50 mL). The organic layer was dried over anhyd. Na<sub>2</sub>SO<sub>4</sub> and concentrated under reduced pressure. The obtained crude mixture was washed with hexane (10 mL) to get pure product as half-white solid in 1.60 g (95 % yield).

**Physical Characteristics: Colour and appearance:** Half-white solid

**M.pt:** 127 °C – 129 °C (Lit. m.pt = 126 °C – 127 °C)<sup>1</sup>

### **Spectral data:**

<sup>1</sup>H NMR (400 MHz, DMSO-d<sub>6</sub>) δ: 1.24 (9H, s), 7.51 (2H, t, *J* = 8 Hz), 7.61 (1H, t, *J* = 8 Hz), 7.71 (2H, t, *J* = 8 Hz), 10.41 (1H, s). <sup>13</sup>C NMR (100 MHz, DMSO-d<sub>6</sub>) δ: 26.8, 128.7, 128.8, 132.7, 135.1, 168.52, 177.6. GC-MS (EI<sup>+</sup>) *m/z*: [M]<sup>+</sup> 205.05.

### **Single crystal X-ray structure of *N*-pivaloyl benzamide**

A toluene solution of *N*-pivaloyl benzamide was slowly evaporated at ambient condition to obtain single crystals suitable for X-ray analysis.

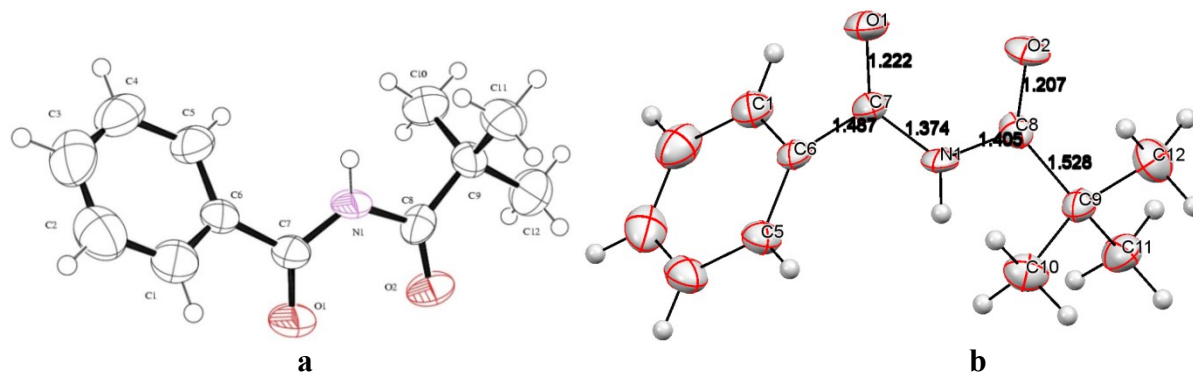

**Figure S1:** Single crystal X-ray structure of *N*-pivaloyl benzamide a) ORTEP diagram; b) ellipsoid style. Bond distance: Ph(O)C7-N1 - 1.374 Å, <sup>t</sup>Bu(O)C8-N1 - 1.405 Å, PhC7=O1 - 1.222 Å, <sup>t</sup>BuC8=O2 - 1.207 Å.

### General Procedure: Synthesis of benzamides and cinnamamides

To a solution of substituted benzoic acid or cinnamic acid in ethylene dichloride at RT, thionyl chloride was added slowly and the reaction mixture was stirred for 1 hour at room temperature and then refluxed for 3 hours. Excess thionyl chloride was distilled off. Without further purification the crude product was taken to next step. To a cold (5 °C) aq. ammonia solution, the prepared acid chloride in THF was added dropwise and stirred vigorously at RT for 3 h. The obtained solid is filtered, washed with water and dried.

### Synthesis of 4-nitrobenzamide

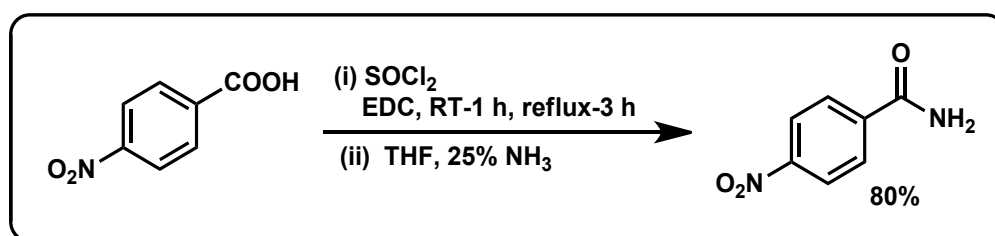

The general procedure stated above was followed. 4-Nitro benzoic acid (500 mg, 2.99 mmol), thionyl chloride (0.65 mL, 8.97 mmol), 25% of ammonia solution (4 mL, 59.8 mmol). Pure product was obtained as white solid in 397 mg (80% yield).

### Physical Characteristics:

**Colour and appearance:** White solid

**M.pt:** 200 °C – 201 °C (Lit. m.pt = 196 °C – 198 °C)<sup>2</sup>

### Spectral data:

**<sup>1</sup>H NMR:** (400 MHz, DMSO-d<sub>6</sub>) δ: 7.74 (1H, br, s), 8.09 (2H, d, *J* = 12 Hz), 8.30 (3H, d, *J* = 12 Hz). **<sup>13</sup>C NMR:** (100 MHz, DMSO-d<sub>6</sub>) δ: 123.9, 129.3, 140.4, 149.5, 166.7. **GC-MS (EI<sup>+</sup>) *m/z*:** [M]<sup>+</sup> 166.05

### Synthesis of 4-methoxybenzamide

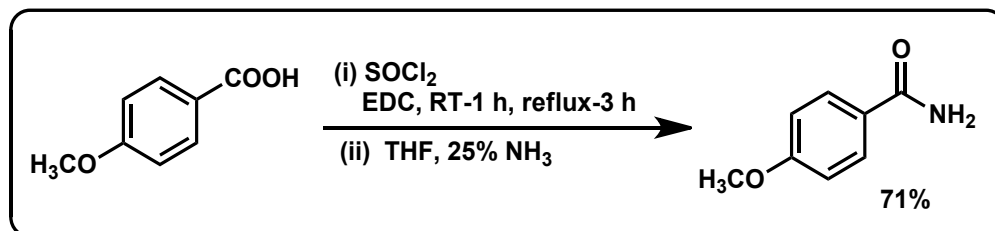

The general procedure stated above was followed. 4-Methoxy benzoic acid (500 mg, 3.28 mmol), thionyl chloride (0.70 mL, 9.86 mmol), 25% of ammonia solution (4.5 mL 65.6 mmol). Pure product was obtained as white solid in 351 mg (71% yield).

**Physical Characteristics:**

**Colour and appearance:** White solid

**M.pt:** 165 °C – 166 °C (Lit. m.pt = 165 °C – 167 °C)<sup>3</sup>

**Spectral data:** <sup>1</sup>H NMR: (400 MHz, DMSO-d<sub>6</sub>) δ: 3.80 (3H, s), 6.97 (2H, d, *J* = 12 Hz), 7.19 (1H, s), 7.85 (3H, d, *J* = 8 Hz). <sup>13</sup>C NMR: (100 MHz, DMSO-d<sub>6</sub>) δ: 55.7, 113.8, 126.9, 129.8, 162.0, 167.9. GC-MS (EI<sup>+</sup>) *m/z*: [M]<sup>+</sup> 151.10

*Synthesis of 4-chlorobenzamide*

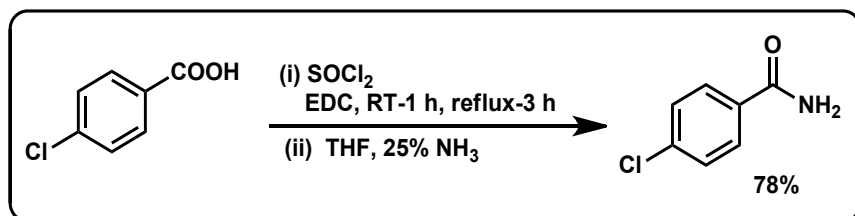

The general procedure stated above was followed. 4-Chloro benzoic acid (500 mg, 3.20 mmol), thionyl chloride (0.69 mL, 9.61 mmol), 25% of ammonia solution (4.3 mL 64.0 mmol). Pure product was obtained as white solid in 387 mg (78% yield).

**Physical Characteristics:**

**Colour and appearance:** White solid

**M.pt:** 175 °C – 176 °C (Lit. m.pt = 178 °C – 180 °C)<sup>2</sup>

**Spectral data:**

<sup>1</sup>H NMR: (400 MHz, DMSO-d<sub>6</sub>) δ: 7.47 (1H, br, s), 7.52 (2H, d, *J* = 12 Hz), 7.89 (2H, d, *J* = 8 Hz), 8.06 (1H, s). <sup>13</sup>C NMR: (100 MHz, DMSO-d<sub>6</sub>) δ: 128.7, 129.8, 133.4, 136.5, 167.3. GC-MS (EI<sup>+</sup>) *m/z*: [M]<sup>+</sup> 155.05.

*Synthesis of 4-methylbenzamide*

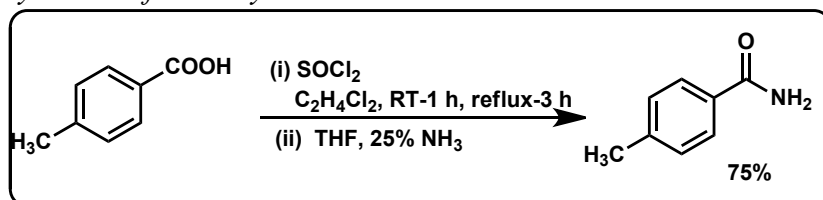

The general procedure stated above was followed. 4-Methyl benzoic acid (500 mg, 3.67 mmol), thionyl chloride (0.79 mL, 11.01 mmol), 25% of ammonia solution (5.0 mL 73.4 mmol). Pure product was obtained as white solid in 372 mg (75% yield).

**Physical Characteristics:**

**Colour and appearance:** White solid

**M.pt:** 160 °C – 163 °C (Lit. m.pt = 159 °C – 160 °C)<sup>4</sup>

**Spectral data:**

**<sup>1</sup>H NMR:** (400 MHz, DMSO-d<sub>6</sub>) δ: 2.34 (3H, s), 7.25 (3H, d, *J* = 8 Hz), 7.77 (2H, d, *J* = 8 Hz), 7.91 (1H, s). **<sup>13</sup>C NMR:** (100 MHz, DMSO-d<sub>6</sub>) δ: 21.3, 127.9, 129.2, 131.8, 141.6, 168.

**GC-MS (EI<sup>+</sup>) *m/z*:** [M]<sup>+</sup> 135.05.

*Synthesis of cinnamic amide*

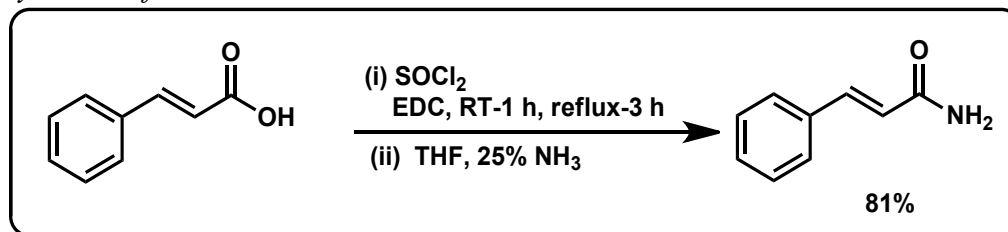

The general procedure stated above was followed. Cinnamic acid (500 mg, 3.37 mmol), thionyl chloride (0.73 mL, 10.1 mmol), 25% of ammonia solution (4.6 mL, 67.4 mmol). Pure product was obtained as white solid in 401 mg (81% yield).

**Physical Characteristics:**

**Colour and appearance:** White solid

**M.pt:** 148 °C – 150 °C (Lit. m.pt = 145 °C – 146 °C)<sup>5</sup>

**Spectral data:**

**<sup>1</sup>H NMR:** (400 MHz, DMSO-d<sub>6</sub>) δ: 6.64 (1H, d, *J* = 16 Hz), 7.14 (1H, br, s), 7.35- 7.46 (4H, m), 7.56 (3H, d, *J* = 8 Hz). **<sup>13</sup>C NMR:** (100 MHz, DMSO-d<sub>6</sub>) δ: 127.5, 132.7, 134.1, 134.6, 140.0, 144.4, 172.0. **GC-MS (EI<sup>+</sup>) *m/z*:** [M]<sup>+</sup> 147.00



### Synthesis of 4-methoxycinnamic amide

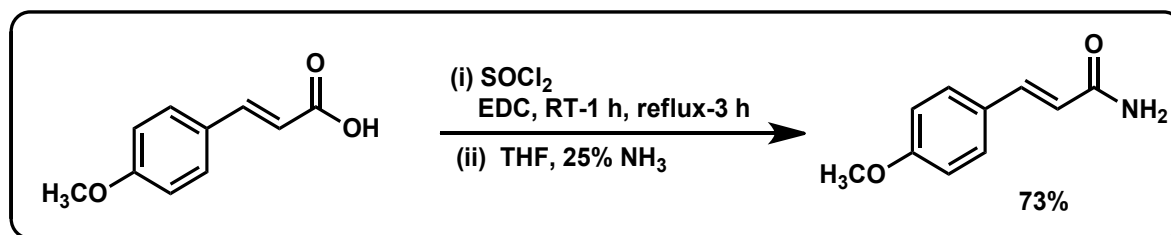

The general procedure stated above was followed. 4-Methoxy cinnamic acid (500 mg, 2.80 mmol), thionyl chloride (0.61 mL, 8.41 mmol), 25% of ammonia solution (3.8 mL 56.0 mmol). Pure product was obtained as half-white solid in 361 mg (73% yield).

#### Physical Characteristics:

**Colour and appearance:** Half-white solid

**M.pt:** 198 °C – 199 °C (Lit. m.pt = 195 °C – 200 °C)<sup>6</sup>

#### Spectral data:

**<sup>1</sup>H NMR:** (400 MHz, DMSO-d<sub>6</sub>) δ: 3.69 (3H, s), 6.37 (1H, d, *J* = 16 Hz), 6.89 (3H, t, *J* = 8 Hz), 7.27 (1H, d, *J* = 16 Hz), 7.40 (3H, t, *J* = 8 Hz). **<sup>13</sup>C NMR:** (100 MHz, DMSO-d<sub>6</sub>) δ: 60.4, 119.5, 124.9, 132.6, 134.3, 144.1, 165.5, 172.2. **GC-MS (EI<sup>+</sup>) *m/z*:** [M]<sup>+</sup>177.10

### Synthesis of piperic amide

#### Synthesis of piperic acid from piperine

A literature reported procedure was followed for synthesis of piperic acid from piperine.<sup>6</sup>

To a cold solution of piperic acid in DCM at 0 °C, thionyl chloride was added slowly, the reaction mixture was stirred for 1 hour at room temperature and then refluxed for 3 hours. Excess thionyl chloride was distilled off. Without further purification the crude product was taken to next step.

To a cold solution (5 °C) of aq. ammonia, the prepared acid chloride in THF was added dropwise and stirred vigorously at RT for 3 h. The obtained solid was filtered, washed with water and dried.

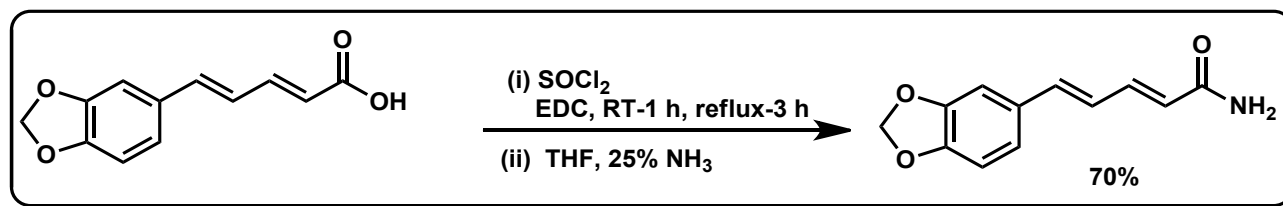

The general procedure stated above was followed. Piperic acid (500 mg, 2.29 mmol), thionyl

chloride (0.49 mL, 6.88 mmol), 25% of ammonia solution (3 mL 45.8 mmol). Pure product was obtained as brown solid in 348 mg (70% yield).

**Physical Characteristics:**

**Colour and appearance:** Brown Solid

**M.pt:** 189 °C – 191 °C

**Spectral data:**

**<sup>1</sup>H NMR:** (400 MHz, DMSO-d<sub>6</sub>) δ: 6.04 -6.09 (3H, m), 6.86- 6.91 (3H, m), 6.95- 7.01 (2H, m), 7.14 (1H, dd, *J* = 12 Hz, *J* = 4 Hz), 7.25 (1H, s), 7.48 (1H, s). **<sup>13</sup>C NMR:** (100 MHz, DMSO-d<sub>6</sub>) δ: 101.7, 106.1, 108.9, 123.0, 125.0, 125.7, 131.2, 138.3, 140.3, 148.1, 148.3, 167.5. **GC-MS (EI<sup>+</sup>) *m/z*:** [M]<sup>+</sup> 217.10.

*Synthesis of N-methyl benzamide*

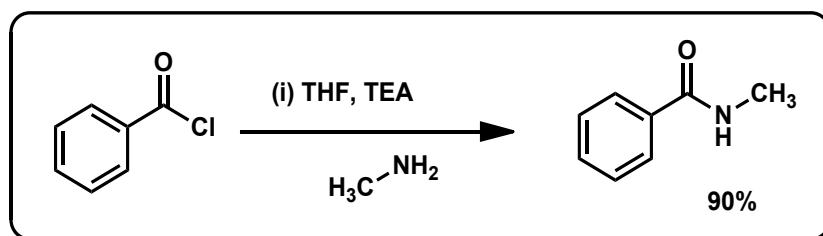

To a cold solution of *N*-methyl amine (166 mg, 5.35 mmol), triethylamine (541 mg, 5.35 mmol) in THF, benzoyl chloride (500 mg, 3.57 mmol) added dropwise and stirred vigorously at RT for 8 h. After completion, the reaction mixture was washed with 5% HCl solution, 5% NaHCO<sub>3</sub> solution and water. The organic layer was dried over anhyd. Na<sub>2</sub>SO<sub>4</sub> and concentrated under reduced pressure. Pure product was obtained after column chromatography as a half white solid in 443 mg (90% yield).

**Physical Characteristics:**

**Colour and appearance:** Half white solid

**M.pt:** 84°C – 87 °C (Lit. m.pt = 81 °C – 83 °C)<sup>7</sup>

**Spectral data:**

**<sup>1</sup>H NMR:** (400 MHz, DMSO-d<sub>6</sub>) δ: 2.76 (3H, d, *J* = 4 Hz), 7.40- 7.48 (3H, m), 7.81 (2H, d, *J* = 8 Hz), 8.40 (1H, s). **<sup>13</sup>C NMR:** (100 MHz, DMSO-d<sub>6</sub>) δ: 26.2, 127.0, 128.2, 131.0, 134.5, 166.6. **GC-MS (EI<sup>+</sup>) *m/z*:** [M]<sup>+</sup> 135.10.

**Table 1:** Reaction optimization for aryl amines

| 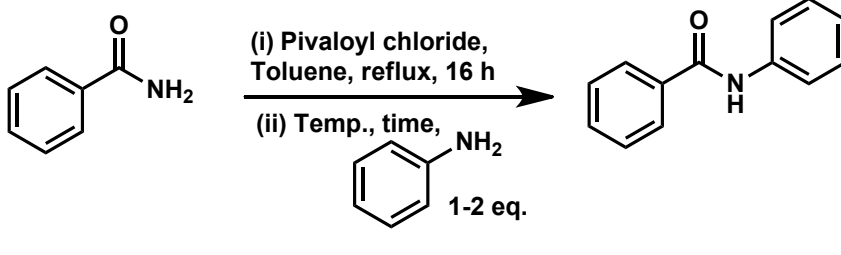 |                       |                  |          |             |
|------------------------------------------------------------------------------------|-----------------------|------------------|----------|-------------|
| S. No                                                                              | Equivalence (aniline) | Temperature (°C) | Time (h) | Yield (%)   |
| 1                                                                                  | 1                     | RT               | 24       | No reaction |
|                                                                                    |                       | 60               | 24       |             |
|                                                                                    |                       | 80               | 24       |             |
|                                                                                    |                       | Reflux           | 24       | Trace       |
| 2                                                                                  | 2                     | RT               | 24       | Trace       |
|                                                                                    |                       | 60               | 24       | Trace       |
|                                                                                    |                       | 80               | 24       | 32          |
|                                                                                    |                       | Reflux           | 1        | 97          |

**General procedure-A:** Transamidation of benzamide with various arylamines

To a stirred solution of benzamide (1 eq.), in toluene (5 mL) at room temperature, pivaloyl chloride (1 eq.), was added dropwise. After addition, the reaction mixture was refluxed for 16 h. The reaction mixture was cooled down to room temperature. Without further purification the crude product was taken to next step.

To the above synthesized imide in toluene, aryl amine (2 eq.), was added and refluxed. Progress of the reaction was monitored by TLC. Starting material consumed within 1- 8 h with all the tested amines. After completion, the reaction mixture was washed with 5% HCl solution, 5% NaHCO<sub>3</sub> solution and water. The organic layer was dried over anhyd. Na<sub>2</sub>SO<sub>4</sub> and concentrated under reduced pressure. Pure product was obtained after column chromatography.

**Table 2:** Transamidation of benzamide with aryl amines

| 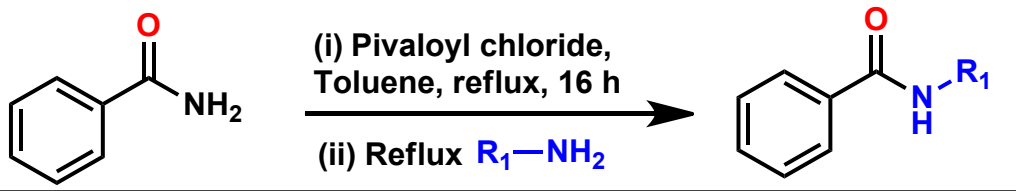 |                                                                                     |                                                                                     |           |          |
|------------------------------------------------------------------------------------|-------------------------------------------------------------------------------------|-------------------------------------------------------------------------------------|-----------|----------|
| S.No                                                                               | Amine                                                                               | Product                                                                             | Yield (%) | Time (h) |
| 1.                                                                                 |    |    | 97        | 1        |
| 2.                                                                                 |    |   | 90        | 1        |
| 3.                                                                                 |   |   | 80        | 7        |
| 4.                                                                                 |  |  | 79        | 2.5      |
| 5.                                                                                 |  |  | 77        | 3        |
| 6.                                                                                 |  |  | 87        | 1        |

|     |                                                                                     |                                                                                     |    |     |
|-----|-------------------------------------------------------------------------------------|-------------------------------------------------------------------------------------|----|-----|
| 7.  |    |    | 89 | 2   |
| 8.  |    |    | 80 | 2.5 |
| 9.  |    |    | 86 | 2   |
| 10. |   |   | 62 | 6   |
| 11. |  |  | 86 | 1.5 |
| 12. |  |  | 59 | 5   |
| 13. |  |  | 68 | 5   |

|     |                                                                                     |                                                                                     |    |   |
|-----|-------------------------------------------------------------------------------------|-------------------------------------------------------------------------------------|----|---|
| 14. | 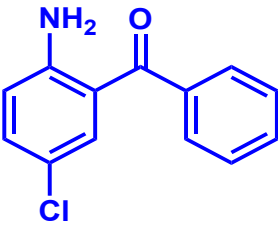   |   | 80 | 8 |
| 15. |    |    | 60 | 5 |
| 16. |    |    | 82 | 3 |
| 17. |   |   | 84 | 2 |
| 18. |  |  | 64 | 6 |

*Transamidation of benzamide with aniline*

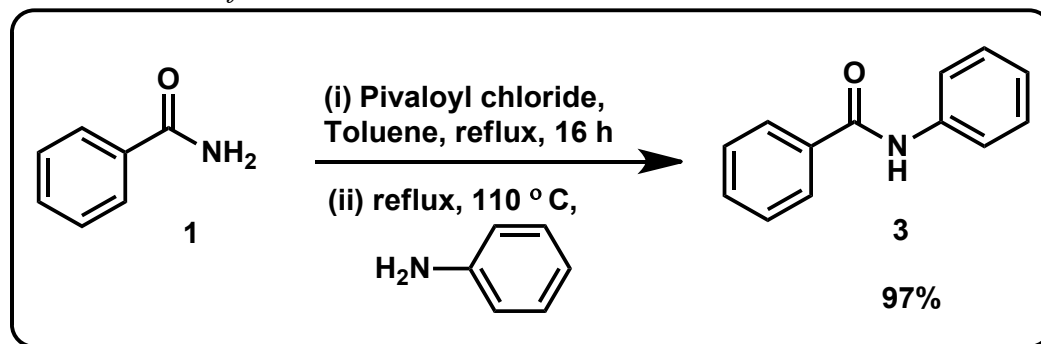

The general procedure-A stated above was followed. Benzamide (100 mg, 0.825 mmol), pivaloyl chloride (99 mg, 0.825mmol), aniline (153.6 mg, 1.65 mmol). Pure product was obtained after column chromatography (Hexane: EtOAc (80:20)) as pale brown solid in 157 mg (97% yield).

**Physical Characteristics:**

**Colour and appearance:** Pale brown solid

**M.pt:** 166 °C –167 °C (Lit. M.pt = 165 °C –167 °C)<sup>8</sup>

**Spectral data:**

**<sup>1</sup>H NMR:** (400 MHz, DMSO-d<sub>6</sub>) δ: 7.11 (1H, t, *J* = 8 Hz), 7.36 (2H, t, *J* = 4 Hz), 7.54-7.60 (3H, m), 7.79 (2H, d, *J* = 8 Hz), 7.96 (2H, d, *J* = 8 Hz), 10.26 (1H, s). **<sup>13</sup>C NMR:** (100 MHz, DMSO-d<sub>6</sub>) δ: 120.8, 124.1, 128.1, 128.8, 129.0, 132.0, 135.4, 139.6, 166.0. **GC-MS (EI<sup>+</sup>) *m/z*:** [M]<sup>+</sup> 197.10

*Transamidation of benzamide with 4-methyl aniline*

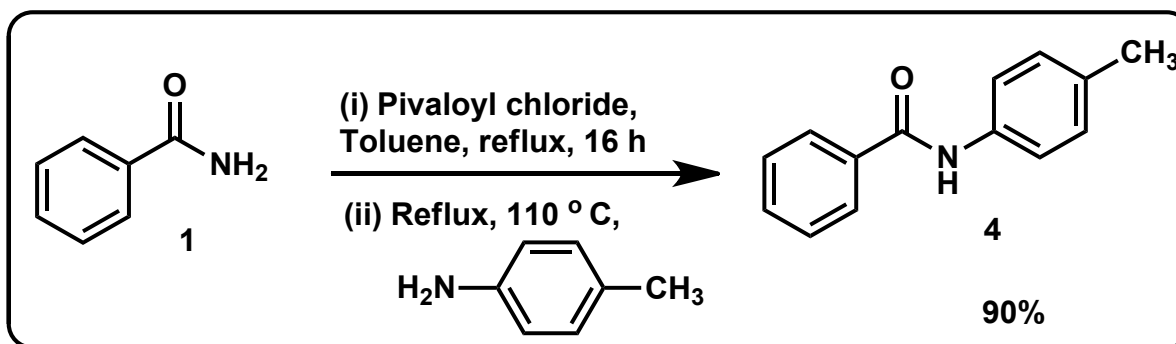

The general procedure-A stated above was followed. Benzamide (100 mg, 0.825 mmol), pivaloyl chloride (99 mg, 0.825mmol), 4-methyl aniline (176.5 mg, 1.65 mmol). Pure product was obtained after column chromatography (Hexane: EtOAc (80:20)) as half-white solid in 156 mg (90% yield).

**Physical Characteristics:**

**Colour and appearance:** Half-white solid

**M.pt:** 157 °C – 158 °C (Lit. M.pt = 158 °C)<sup>9</sup>

**Spectral data:**

**<sup>1</sup>H NMR** (400 MHz, CDCl<sub>3</sub>) δ: 2.33 (3H, s), 7.14 (2H, d, *J* = 12 Hz), 7.43 (2H, t, *J* = 8Hz), 7.50-7.53 (3H, m), 7.84 (2H, d, *J* = 8 Hz), 8.01 (1H, br, s) **<sup>13</sup>C NMR** (100 MHz, CDCl<sub>3</sub>) δ: 20.9, 120.4, 127.0, 128.7, 129.5, 131.7, 134.2, 135.0, 135.4, 165.8. **GC-MS (EI<sup>+</sup>) *m/z*:** [M]<sup>+</sup> 211.10

*Transamidation of benzamide with 2,6 dimethyl aniline*

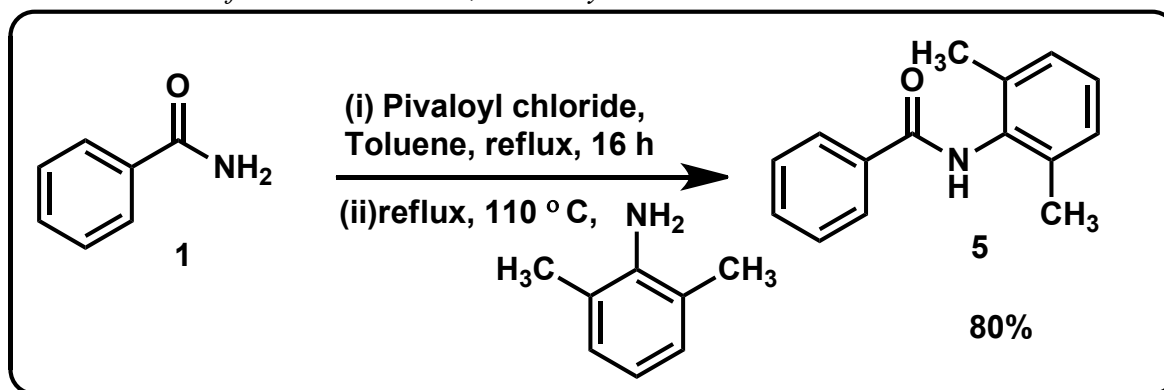

The general procedure-A stated above was followed. Benzamide (100 mg, 0.825 mmol), pivaloyl chloride (99 mg, 0.825mmol), 2,6 dimethylaniline (199.9 mg, 1.65 mmol). Pure product was obtained after column chromatography (Hexane: EtOAc (80:20)) as pale brown solid in 148 mg (80 % yield).

**Physical Characteristics:**

**Colour and appearance:** Pale brown solid

**m.pt:** 167 °C –169 °C (Lit. M.pt = 168 °C – 169 °C)<sup>10</sup>

**Spectral data:**

**<sup>1</sup>H NMR:** (400 MHz, DMSO-d<sub>6</sub>) δ: 2.20 (6H, s), 7.14 (3H, s), 7.52-7.62 (3H, m), 8.02 (2H, d, *J* = 8 Hz) 9.79 (1H, s). **<sup>13</sup>C NMR:** (100 MHz, DMSO-d<sub>6</sub>) δ: 18.5, 127.1, 127.9, 128.2, 128.9, 131.9, 134.8, 135.8, 136.1, 165.5. **GC-MS (EI<sup>+</sup>) *m/z*:** [M]<sup>+</sup> 225.10

*Transamidation of benzamide with 4-hydroxy aniline*

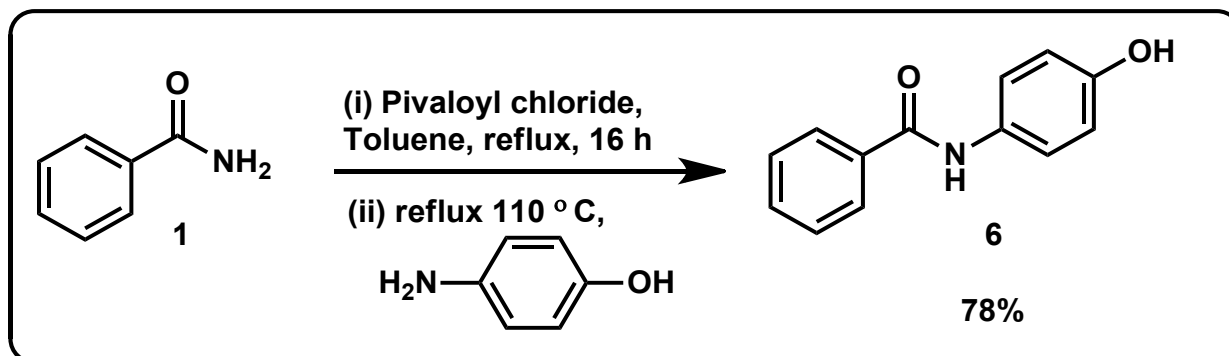

The general procedure-A stated above was followed. Benzamide (100 mg, 0.825 mmol), pivaloyl chloride (99 mg, 0.825mmol), 4-hydroxy aniline (179.8 mg, 1.65 mmol). Pure product was



obtained after column chromatography (Hexane: EtOAc (80:20)) as half-white solid in 137 mg (78% yield).

**Physical Characteristics:**

**Colour and appearance:** Half white solid

**M.pt:** 208 °C – 209 °C (Lit. M.pt = 207 °C –209 °C)<sup>11</sup>

**Spectral data:**

**<sup>1</sup>H NMR** (400 MHz, DMSO-d<sub>6</sub>) δ: 6.80 (2H, d, *J* = 8 Hz), 7.54 -7.62 (5H, m), 7.98 (2H, d, *J* = 4 Hz), 9.32 (1H, br, s), 10.07 (1H, s). **<sup>13</sup>C NMR** (100 MHz, DMSO-d<sub>6</sub>) δ: 120.1, 127.5, 132.7, 133.5, 135.9, 136.4, 140.3, 158.9, 170.1. **GC-MS (EI<sup>+</sup>) *m/z*:** [M]<sup>+</sup> 213.15

*Transamidation of benzamide with 2-hydroxy aniline*

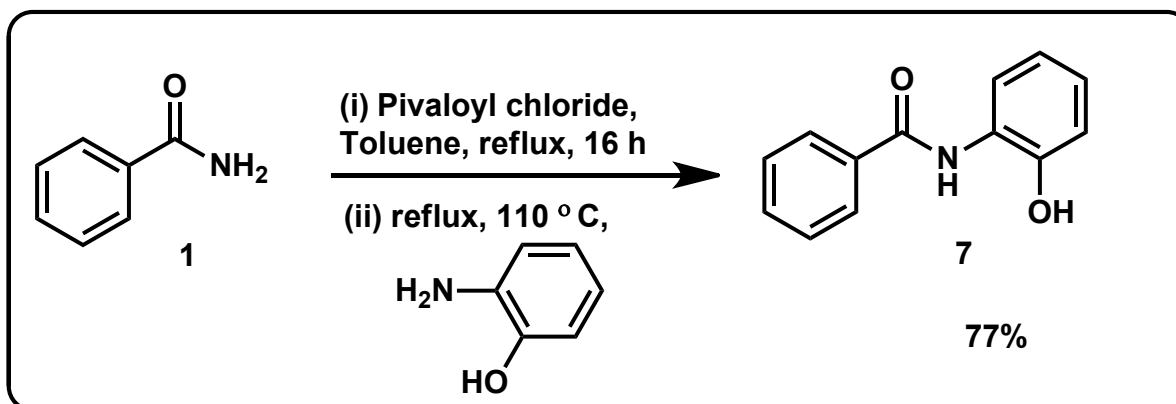

The general procedure-A stated above was followed. Benzamide (100 mg, 0.825 mmol), pivaloyl chloride (99 mg, 0.825mmol), 2-hydroxy aniline (180.0 mg, 1.65 mmol). Pure product was obtained after column chromatography (Hexane: EtOAc (80:20)) as brown solid in 135 mg (77% yield).

**Physical Characteristics:**

**Colour and appearance:** Brown solid

**M.pt:** 166 °C – 167 °C (Lit. M.pt = 167 °C)<sup>12</sup>

**Spectral data:**

**<sup>1</sup>H NMR** (400 MHz, DMSO-d<sub>6</sub>) δ: 6.90 (1H, t, *J* = 8 Hz), 6.97- 7.00 (1H, m), 7.10 (1H, t, *J* = 8Hz), 7.57- 7.64 (2H, m), 7.65-7.68 (1H, m), 7.74 (1H, d, *J* = 8 Hz), 8.03 (2H, d, *J* = 8Hz), 9.57 (1H, s), 9.81 (1H, s). **<sup>13</sup>C NMR** (100 MHz, DMSO-d<sub>6</sub>) δ: 116.4, 119.5, 124.6, 126.1, 126.3, 127.9, 129.0, 132.1, 134.8, 149.8, 165.7. **GC-MS (EI<sup>+</sup>) *m/z*:** [M]<sup>+</sup> 213.10

*Transamidation of benzamide with 4-methoxy aniline*

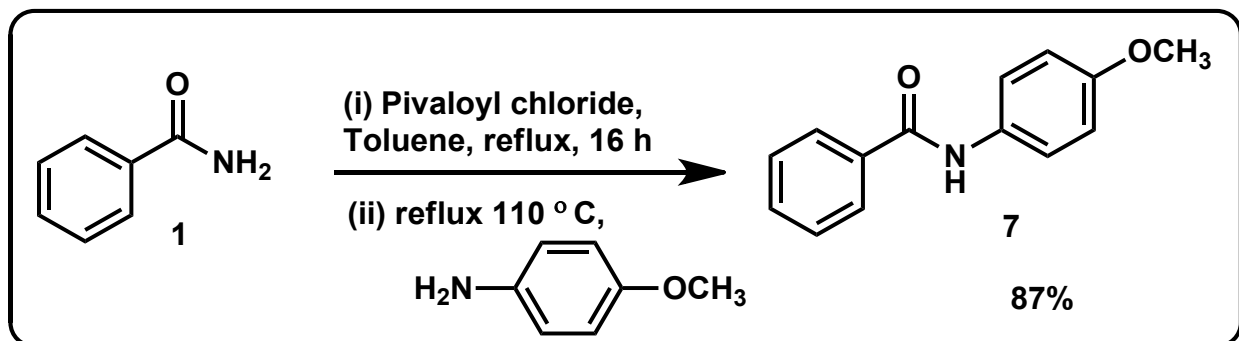

The general procedure-A state above was followed for transamidation. Benzamide (100 mg, 0.825 mmol), pivaloyl chloride (99 mg, 0.825mmol), 4-methoxy aniline (203.1mg, 1.65 mmol). Pure product was obtained after column chromatography (Hexane: EtOAc (80:20)) light brown solid in 163 mg (87% yield).

**Physical Characteristics:**

**Colour and appearance:** Light brown solid

**M.pt:** 155 °C – 156.5 °C (Lit. M.pt = 155 °C – 156 °C)<sup>8</sup>

**Spectral data:**

<sup>1</sup>H NMR (400 MHz, CDCl<sub>3</sub>) δ: 3.81 (3H, s), 6.90 (2H, d, *J* = 12 Hz), 7.44-7.55 (5H, m,) 7.85 (3H, d, *J* = 4 Hz). <sup>13</sup>C NMR (100 MHz, CDCl<sub>3</sub>) δ: 55.5, 114.2, 122.2, 127.0, 128.7, 131.0, 131.7, 135.0, 156.6, 165.7. GC-MS (EI<sup>+</sup>) *m/z*: [M]<sup>+</sup> 227.10

*Transamidation of benzamide with 4- fluoro aniline*

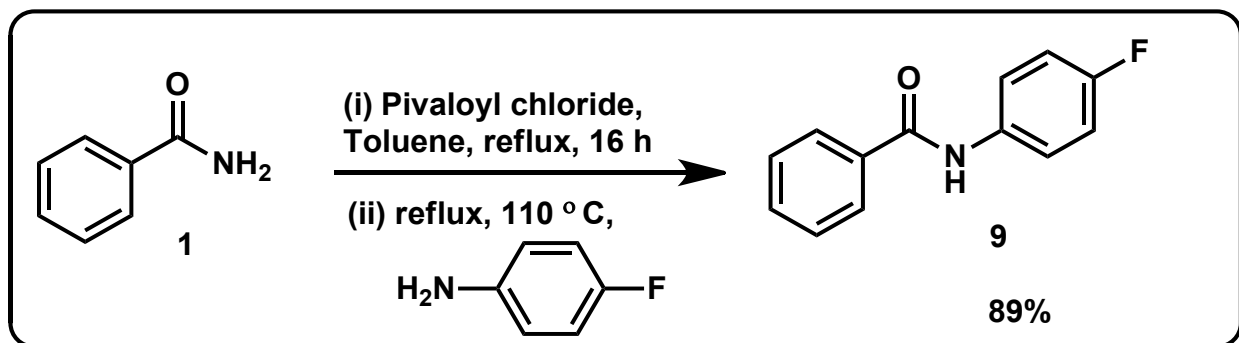

The general procedure-A stated above was followed. Benzamide (100 mg, 0.825 mmol), pivaloyl chloride (99 mg, 0.825mmol), 4-fluoro aniline (183.3mg, 1.65 mmol). Pure product was obtained after column chromatography (Hexane: EtOAc (80:20)) as white solid in 157 mg (89 % yield).

**Physical Characteristics:**

**Colour and appearance:** White solid

**M.pt:** 175 °C – 177 °C (Lit. M.pt = 175 °C – 176 °C)<sup>13</sup>

**Spectral data:**

**<sup>1</sup>H NMR** (400 MHz, DMSO-d<sub>6</sub>) δ: 7.20 (2H, t, *J* = 8 Hz), 7.52-7.60 (3H, m), 7.78-7.81 (2H, m), 7.96 (2H, d, *J* = 4 Hz), 10.31 (1H, s) **<sup>13</sup>C NMR** (100 MHz, DMSO-d<sub>6</sub>) δ: 115.5, 115.7, 122.6, 122.7, 128.0, 128.8, 132.0, 135.2, 135.9, 136.0, 157.5, 159.6, 165.9. **GC-MS (EI<sup>+</sup>) *m/z*:** [M]<sup>+</sup> 215.10

*Transamidation of benzamide with 4-chloro aniline*

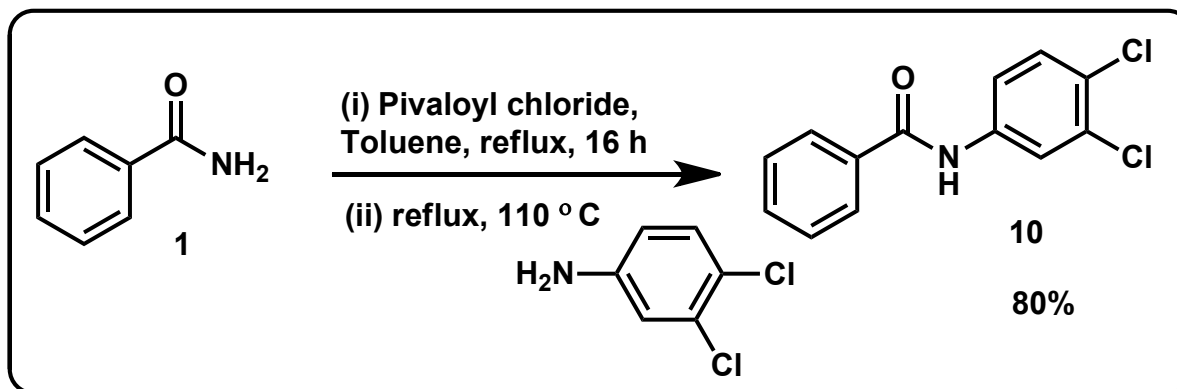

The general procedure-A stated above was followed. Benzamide (100 mg, 0.825 mmol), pivaloyl chloride (99 mg, 0.825mmol), 4-chloro aniline (267.3mg, 1.65 mmol). Pure product was obtained after column chromatography (Hexane: EtOAc (80:20)) as pale-yellow solid in 175 mg (80% yield).

**Physical Characteristics:**

**Colour and appearance:** Pale-yellow solid

**M.pt.** 145 °C - 147 °C (Lit. M.pt.145 °C - 146 °C)<sup>14</sup>

**Spectral data:**

**<sup>1</sup>H NMR** (400 MHz, DMSO-d<sub>6</sub>) δ: 7.53-7.57 (2H, m), 7.60-7.64 (2H, m), 7.77 (1H, d, *J* = 8 Hz), 7.95-7.97 (2H, m), 8.17 (1H, br, s), 10.50 (1H, s). **<sup>13</sup>C NMR** (100 MHz, DMSO-d<sub>6</sub>) δ: 120.6, 121.8, 125.5, 128.1, 128.9, 131.0, 131.3, 132.4, 134.8, 139.8, 166.3. **GC-MS (EI<sup>+</sup>) *m/z*:** [M]<sup>+</sup> 266.05.

*Transamidation of benzamide with 4-Bromo aniline*

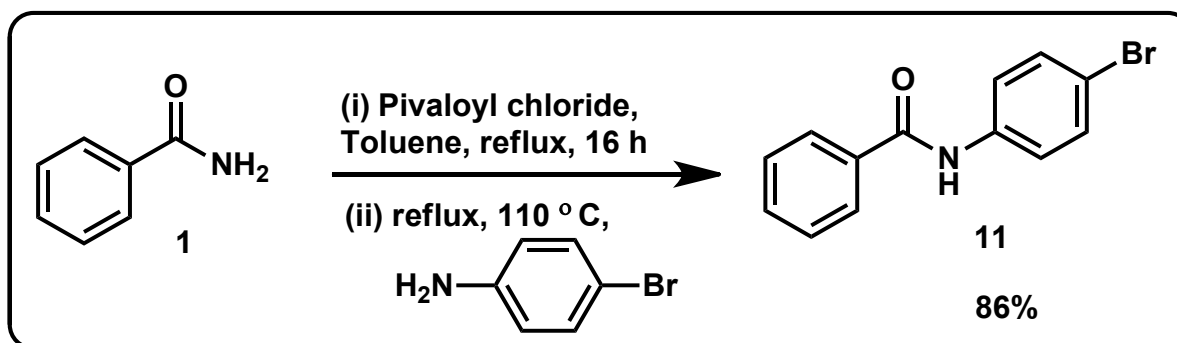

The general procedure-A stated above was followed. Benzamide (100 mg, 0.825 mmol), pivaloyl chloride (99 mg, 0.825mmol), 4-bromo aniline (283.8 mg, 1.65 mmol). Pure product was obtained after column chromatography (Hexane: EtOAc (80:20)) as half-white solid in 195 mg (86% yield).

**Physical Characteristics:**

**Colour and appearance:** Half-white solid

**M.pt:** 202 °C – 204 °C (Lit. M.pt = 203 °C – 204 °C)<sup>13</sup>

**Spectral data:**

<sup>1</sup>H NMR (400 MHz, CDCl<sub>3</sub>) δ: 7.47-7.51 (4H, m), 7.54-7.59 (3H, m), 7.81 (1H, br, s), 7.85-7.87 (2H, m). <sup>13</sup>C NMR (100 MHz, CDCl<sub>3</sub>) δ: 117.1, 121.7, 127.0, 128.9, 132.1, 134.6, 137.0, 165.6. GC-MS (EI<sup>+</sup>) *m/z*: [M-H]<sup>+</sup> 275.05

*Transamidation of benzamide with p-aminobenzonitrile*

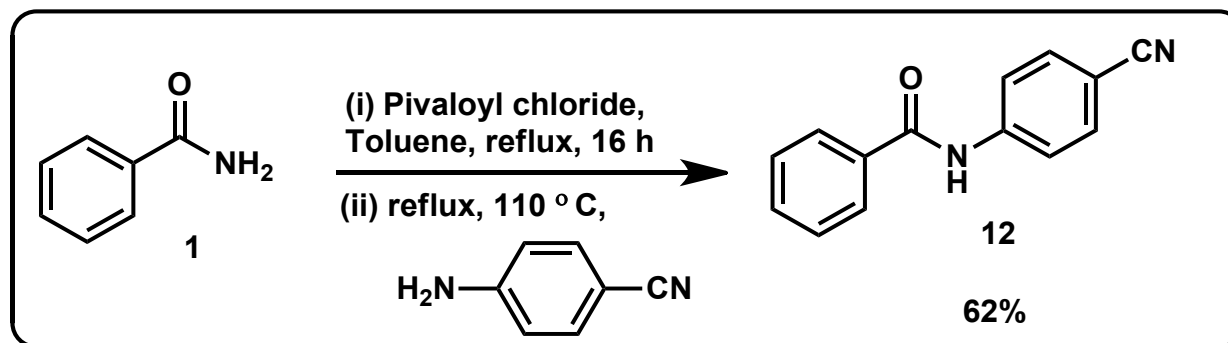

The general procedure-A stated above was followed. Benzamide (100 mg, 0.825 mmol), pivaloyl chloride (99 mg, 0.825mmol), *p*-aminobenzonitrile (194.7mg, 1.65 mmol). Pure product was obtained after column chromatography (Hexane: EtOAc (80:20)) as half-white solid in 115 mg (62% yield).

**Physical Characteristics:**

**Colour and appearance:** Half white solid

**M.pt:** 167 °C –169 °C (Lit. M.pt = 165 °C – 167 °C)<sup>15</sup>

**Spectral data:**

**<sup>1</sup>H NMR:** (400 MHz, DMSO-d<sub>6</sub>) δ: 7.54- 7.63 (3H, m), 7.82 (2H, d, *J* = 8 Hz), 7.95-8.02 (4H, m), 10.66 (1H, s). **<sup>13</sup>C NMR:** (100 MHz, DMSO-d<sub>6</sub>) δ: 105.8, 119.5, 120.6, 128.3, 128.9, 132.5, 133.5, 134.8, 143.9, 166.6. **GC-MS (EI<sup>+</sup>) *m/z*:** [M]<sup>+</sup> 222.10

*Transamidation of benzamide with 4-amino benzoic acid*

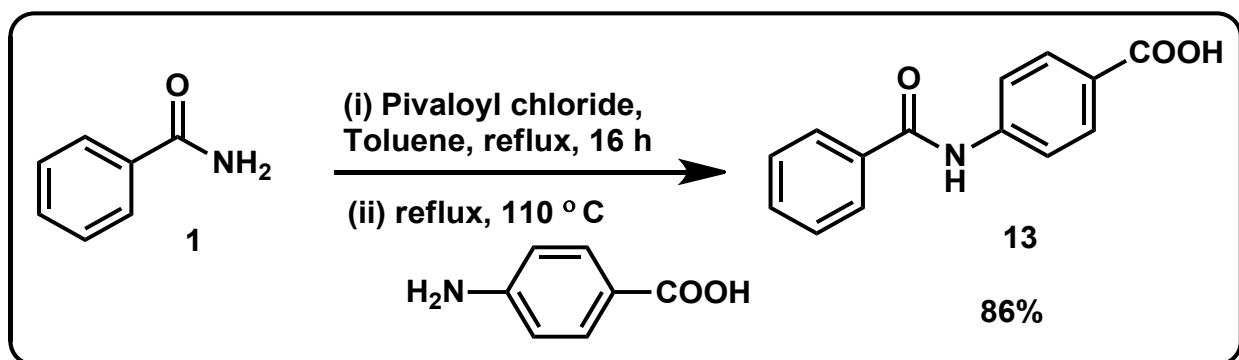

The general procedure-A stated above was followed. Benzamide (100 mg, 0.825 mmol), pivaloyl chloride (99 mg, 0.825mmol), 4-amino benzoic acid (226.2mg, 1.65 mmol). Pure product was obtained after column chromatography (Hexane: EtOAc (80:20)) as white solid in 171 mg (86% yield).

**Physical Characteristics:**

**Colour and appearance:** White solid

**Spectral data:**

**<sup>1</sup>H NMR** (400 MHz, DMSO-d<sub>6</sub>) δ: 7.53-7.57 (2H, m), 7.60-7.64 (1H, m), 7.92-7.98 (6H, m), 10.54 (1H, s), 12.74 (1H, br, s). **<sup>13</sup>C NMR** (100 MHz, DMSO-d<sub>6</sub>) δ: 119.9, 125.9, 128.2, 128.9, 130.7, 132.3, 135.2, 143.7, 166.4, 167.4. **HRMS (ESI-MS) *m/z*:** Calculated for C<sub>14</sub>H<sub>12</sub>NO<sub>3</sub> [M+H]<sup>+</sup> 242.0817, found: 242.0825.

*Transamidation of benzamide with 4-Nitro aniline*

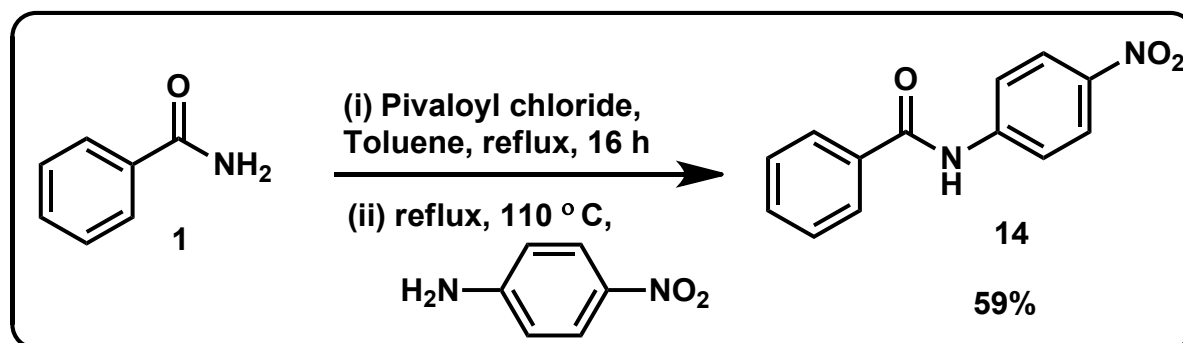

The general procedure-A stated above was followed. Benzamide (100 mg, 0.825 mmol), pivaloyl chloride (99 mg, 0.825mmol), 4-nitro aniline (227.8mg, 1.65 mmol). Pure product was obtained after column chromatography (Hexane: EtOAc (80:20)) as yellow solid in 117 mg (59% yield).

**Physical Characteristics:**

**Colour and appearance:** Yellow solid

**M.pt:** 202 °C –203 °C (Lit. M.pt = 201 °C –202 °C)<sup>15</sup>

**Spectral data:**

<sup>1</sup>H NMR (400 MHz, DMSO-d<sub>6</sub>) δ: 7.60 -7.62 (2H, m), 7.64-7.69 (1H, m), 8.04 (2H, d, *J* = 8 Hz), 8.13 (2H, d, *J* = 12 Hz), 8.32 (2H, d, *J* = 12 Hz), 10.87 (1H, s). <sup>13</sup>C NMR (100 MHz, DMSO-d<sub>6</sub>) δ: 125.0, 130.0, 133.1, 133.7, 137.4, 139.4, 147.7, 150.7, 171.5. GC-MS (EI<sup>+</sup>) *m/z*: [M]<sup>+</sup> 242.10

*Transamidation of benzamide with 4-amino-acetophenone*

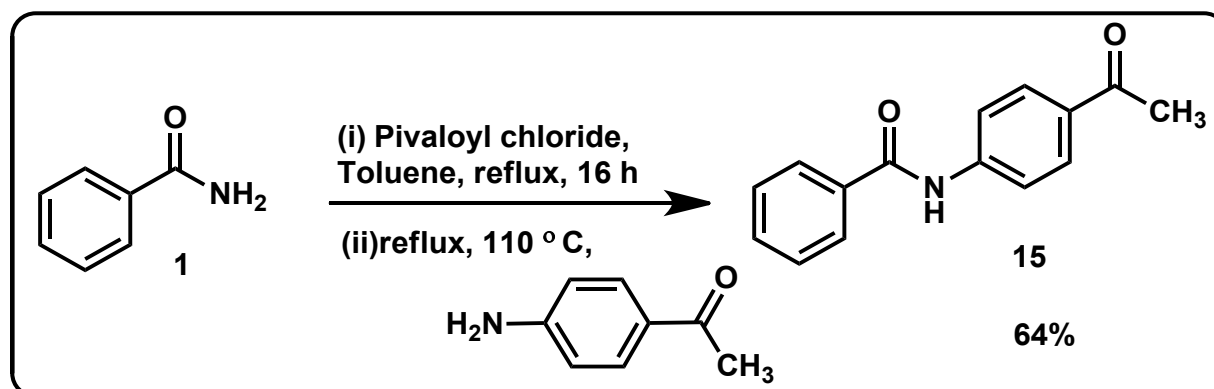

The general procedure-A stated above was followed. Benzamide (100 mg, 0.825 mmol), pivaloyl chloride (99 mg, 0.825mmol), 4-amino-acetophenone (222.9 mg, 1.65 mmol). Pure product was

obtained after column chromatography (Hexane: EtOAc (80:20)) as white solid in 126 mg (64% yield).

**Physical Characteristics:**

**Colour and appearance:** White solid

**m.pt:** 203 °C – 205 °C (Lit. M.pt = 200 °C) <sup>16</sup>

**Spectral data:**

**<sup>1</sup>H NMR:** (400 MHz, DMSO-*d*<sub>6</sub>) δ: 2.55 (3H, s), 7.55 (2H, t, *J* = 8 Hz), 7.61- 7.64 (1H, m), 7.94- 7.99 (6H, m), 10.57 (1H, s). **<sup>13</sup>C NMR:** (100 MHz, DMSO-*d*<sub>6</sub>) δ: 26.9, 119.9, 128.2, 128.9, 129.7, 132.3, 132.4, 135.0, 144.0, 166.5, 197.1. **GC-MS (EI<sup>+</sup>) *m/z*:** [M]<sup>+</sup> 239.05

*Transamidation of benzamide with 2-amino-5-chloro benzophenone*

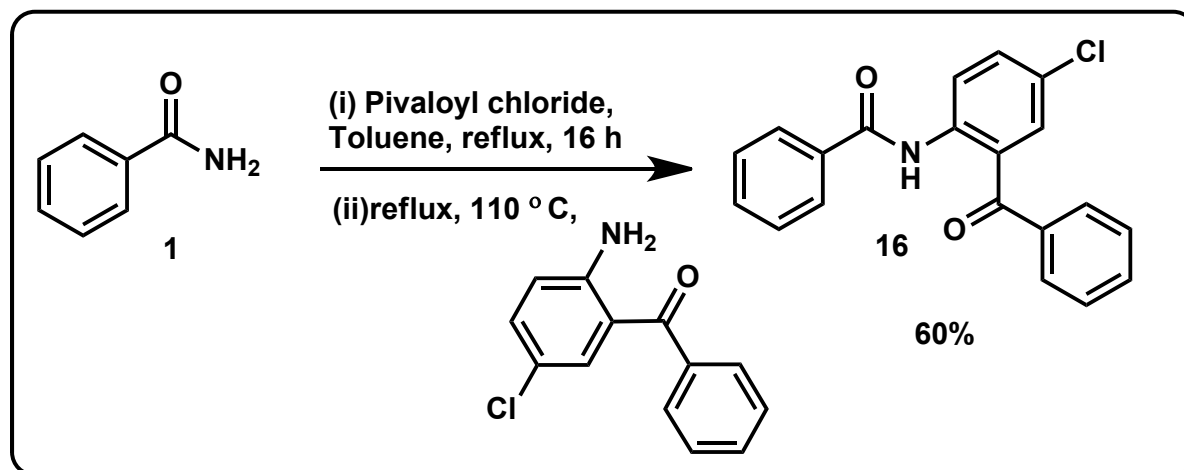

The general procedure-A stated above was followed. Benzamide (100 mg, 0.825 mmol), pivaloyl chloride (99 mg, 0.825mmol), 2-amino-5-chloro benzophenone (382.2 mg, 1.65 mmol). Pure product was obtained after column chromatography (Hexane: EtOAc (80:20)) as yellow solid in 166 mg (60% yield).

**Physical Characteristics:**

**Colour and appearance:** Yellow solid

**m.pt:** 112 °C – 114 °C

**<sup>1</sup>H NMR:** (400 MHz, CDCl<sub>3</sub>) δ: 7.42- 7.58 (8H, m), 7.65 (2H, d, *J* = 8 Hz), 7.96 (2H, d, *J* = 8 Hz), 8.80 (1H, d, *J* = 8 Hz), 11.70 (1H, s). **<sup>13</sup>C NMR:** (100 MHz, CDCl<sub>3</sub>) δ: 123.0, 124.4, 127.3, 127.4, 128.6, 128.9, 132.2, 132.9, 133.1, 134.2, 134.3, 138.0, 139.6, 165.7, 199.0. **GC-MS (EI<sup>+</sup>) *m/z*:** [M]<sup>+</sup> 335.00

*Transamidation of benzamide with 2-amino-benzamide*

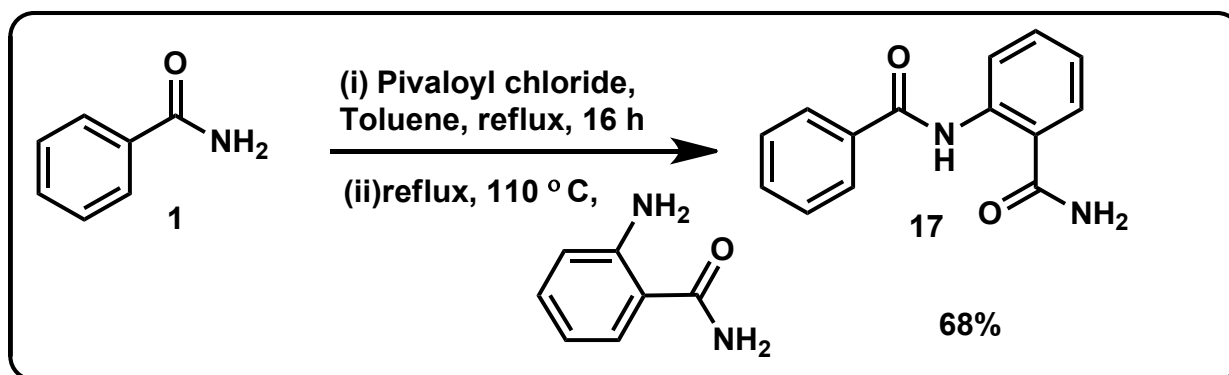

The general procedure-A state above was followed for transamidation. Benzamide (100 mg, 0.825 mmol), pivaloyl chloride (99 mg, 0.825mmol), 2-amino-benzamide (224.6 mg, 1.65 mmol). Pure product was obtained after column chromatography (Hexane: EtOAc (80:20)) as white solid in 134 mg (68% yield).

**Physical Characteristics:**

**Colour and appearance:** White solid

**m.pt:** 215 °C –217 °C (Lit. M.pt = 218 °C – 219 °C)<sup>17</sup>

**Spectral data:**

**<sup>1</sup>H NMR:** (400 MHz, DMSO-d<sub>6</sub>) δ: 7.19 (1H, t, *J* = 8 Hz), 7.56-7.66 (4H, m), 7.86 -7.96 (4H, m), 8.44 (1H, s), 8.71(1H, d, *J* = 8 Hz), 12.95 (1H, s). **<sup>13</sup>C NMR:** (100 MHz, DMSO-d<sub>6</sub>) δ: 119.6, 120.5, 123.1, 127.4, 129.2, 129.4, 132.5, 133.0, 135.0, 140.5, 164.9, 171.6. **HRMS (ESI-MS)** *m/z*: Calculated for C<sub>14</sub>H<sub>12</sub>N<sub>2</sub>O<sub>2</sub>Na [M+Na]<sup>+</sup> 263.0796, found: 263.0824.

*Transamidation of benzamide with α- naphthyl amine*

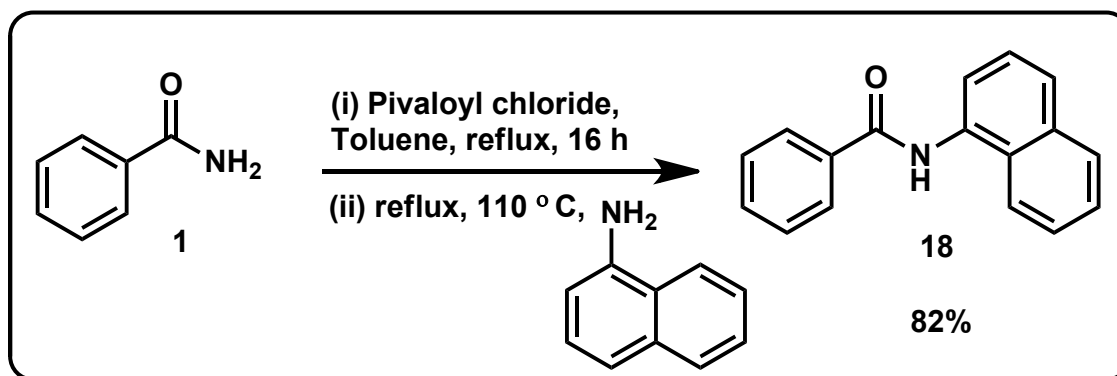

The general procedure-A stated above was followed. Benzamide (100 mg, 0.825 mmol), pivaloyl chloride (99 mg, 0.825mmol), α- naphthyl amine (236.2 mg, 1.65 mmol). Pure product was



obtained after column chromatography (Hexane: EtOAc (80:20)) as pale-purple solid in 167 mg (82% yield).

**Physical Characteristics:**

**Colour and appearance:** Pale-purple solid

**M.pt:** 171 °C – 172 °C (Lit. M.pt = 170 °C – 171 °C)<sup>14</sup>

**Spectral data:**

**<sup>1</sup>H NMR:** (400 MHz, DMSO-d<sub>6</sub>) δ: 7.53- 7.65 (7 H, m), 7.87 (1H, d, *J* = 8 Hz), 7.98- 8.02 (2H, m), 8.12 (2H, d, *J* = 8 Hz), 10.46 (1H, s). **<sup>13</sup>C NMR:** (100 MHz, DMSO-d<sub>6</sub>) δ: 123.8, 124.4, 126.0, 126.4, 126.5, 126.7, 128.5, 128.9, 129.7, 132.1, 134.2, 134.3, 134.9, 166.6. **GC-MS (EI<sup>+</sup>)** *m/z*: [M]<sup>+</sup> 247. 15.

*Transamidation of benzamide with 2-amino thiazole*

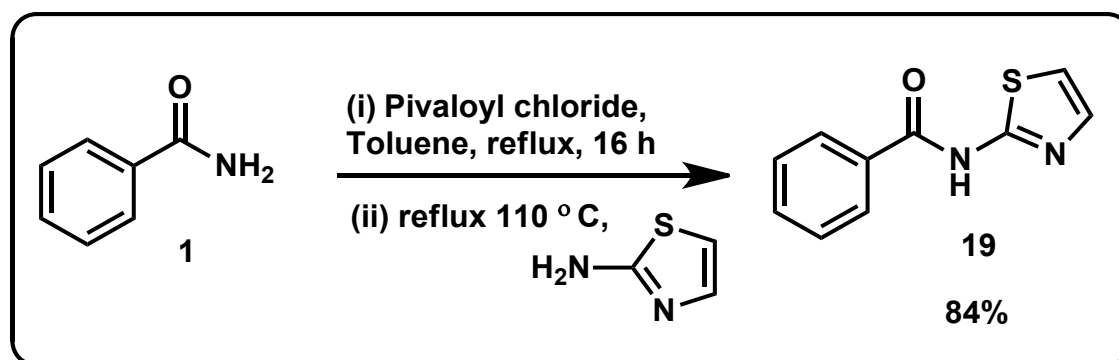

The general procedure-A stated above was followed. Benzamide (100 mg, 0.825 mmol), pivaloyl chloride (99 mg, 0.825mmol), 2-amino thiazole (165.1 mg, 1.65 mmol). Pure product was obtained after column chromatography (Hexane: EtOAc (80:20)) as brown solid in 141 mg (84% yield).

**Physical Characteristics:**

**Colour and appearance:** Brown solid

**M.pt:** 140 °C – 142 °C (Lit. M.pt = 140 °C – 141 °C)<sup>18</sup>

**Spectral data:**

**<sup>1</sup>H NMR** (400 MHz, DMSO-d<sub>6</sub>) δ: 7.29 (1H, d, *J* = 4 Hz), 7.53-7.57 (3H, m), 7.62-7.66 (1H, m), 8.10 (2H, d, *J* = 8 Hz), 12.63 (1H, br, s). **<sup>13</sup>C NMR** (100 MHz, DMSO-d<sub>6</sub>) δ: 114.3, 128.6, 129.0, 132.6, 133.0, 138.0, 159.2, 165.5. **GC-MS (EI<sup>+</sup>)** *m/z*: [M]<sup>+</sup> 204.05

### Transamidation of benzamide with *N*-methyl aniline

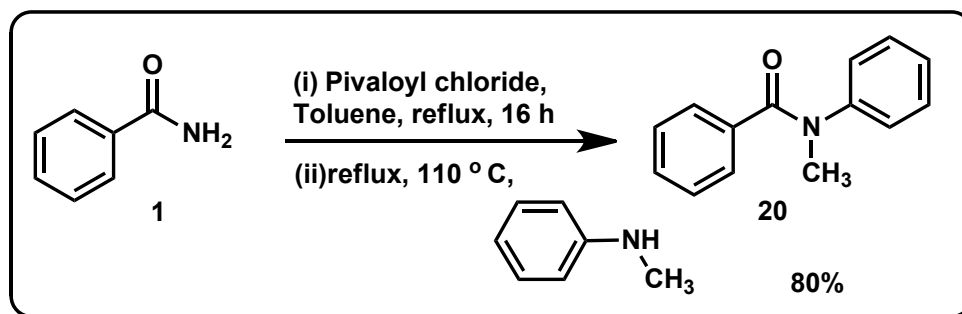

The general procedure-A stated above was followed. Benzamide (100 mg, 0.825 mmol), pivaloyl chloride (99 mg, 0.825 mmol), *N*-methyl aniline (176.7 mg, 1.65 mmol). Pure product was obtained after column chromatography (Hexane: EtOAc (80:20)) as colourless liquid in 139 mg (80% yield).

#### **Physical Characteristics:**

**Colour and appearance:** Colourless liquid

#### **Spectral data:**

**<sup>1</sup>H NMR:** (400 MHz, CDCl<sub>3</sub>) δ: 3.42 (3H, s), 6.97 (2H, d, *J* = 8 Hz), 7.02- 7.09 (3H, m), 7.13, (3H, t, *J* = 8 Hz), 7.26 (2H, d, *J* = 8 Hz). **<sup>13</sup>C NMR:** (100 MHz, CDCl<sub>3</sub>) δ: 38.3, 126.4, 126.8, 127.6, 128.6, 129.1, 129.5, 135.9, 144.8, 170.5. **GC-MS (EI<sup>+</sup>) *m/z*:** [M]<sup>+</sup> 211.10

#### **General procedure-B:** Transamidation of various amides with 4-methoxy aniline

To a stirred solution of various amides (1 eq.), in toluene (5 mL) at room temperature, pivaloyl chloride (1 eq.), was added dropwise. After addition the reaction mixture was refluxed for 16 h. The reaction mixture was cooled down to room temperature. Without further purification the crude product was taken to next step.

To the above synthesized imide in toluene, 4-methoxy aniline (2 eq.), was added and refluxed. Progress of the reaction was monitored by TLC. Starting material consumed in 1 h - 4 h with 4-methoxy aniline. After completion, the reaction mixture was washed with 5% HCl solution, 5% NaHCO<sub>3</sub> solution, water. The organic layer was dried over anhyd. Na<sub>2</sub>SO<sub>4</sub> and concentrated under reduced pressure. Pure product was obtained after column chromatography.

**Table 3:** Transamidation of various amides with 4-methoxy aniline

| S.No                                                                                                                  | Amide                                                                               | Product                                                                              | Yield % | Time h |
|-----------------------------------------------------------------------------------------------------------------------|-------------------------------------------------------------------------------------|--------------------------------------------------------------------------------------|---------|--------|
| <p style="text-align: center;">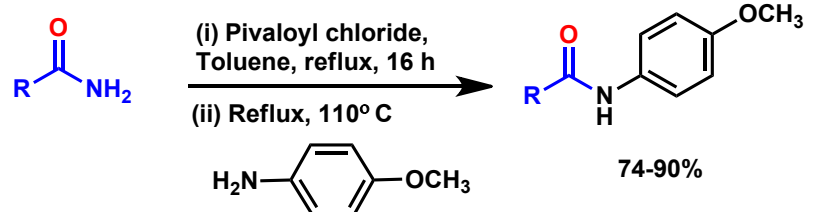</p> |                                                                                     |                                                                                      |         |        |
| 1.                                                                                                                    |    |    | 76      | 2      |
| 2.                                                                                                                    |    |    | 82      | 2      |
| 3.                                                                                                                    |   |   | 90      | 1      |
| 4.                                                                                                                    |  |  | 74      | 4      |
| 5.                                                                                                                    |  |  | 76      | 2      |
| 6.                                                                                                                    |  |  | 82      | 2      |

*Transamidation of acetamide with 4-methoxy aniline*

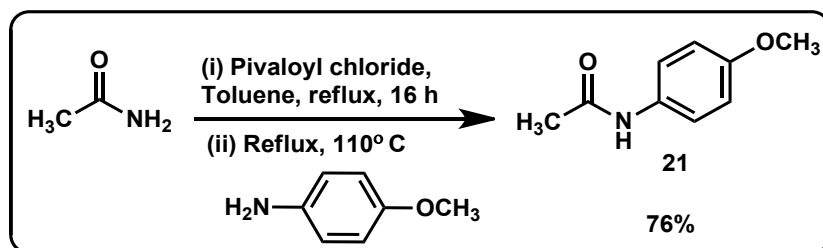

The general procedure-B stated above was followed. Acetamide (100 mg, 1.69 mmol), pivaloyl chloride (203 mg, 1.69mmol), 4-methoxy aniline (416 mg, 3.38 mmol). Pure product was obtained after column chromatography (Hexane: EtOAc (80:20)) as half-white solid in 212 mg (76% yield).

**Physical Characteristics:**

**Colour and appearance:** Half- white solid

**M.pt:** 128 °C – 130 °C (Lit. m.pt = 126 °C – 128 °C)<sup>9</sup>

**Spectral data:**

**<sup>1</sup>H NMR:** (400 MHz, CDCl<sub>3</sub>) δ: 2.05 (3H, s), 3.69 (3H, s), 6.74 (2H, d, *J* = 12 Hz), 7.32 (2H, d, *J* = 12 Hz), 8.08 (1H, s). **<sup>13</sup>C NMR:** (100 MHz, CDCl<sub>3</sub>) δ: 24.0, 55.4, 114.0, 122.0, 131.2, 156.3, 168.8. **GC-MS (EI<sup>+</sup>) *m/z*:** [M]<sup>+</sup> 165.10

*Transamidation of 4-chloro benzamide with 4-methoxy aniline*

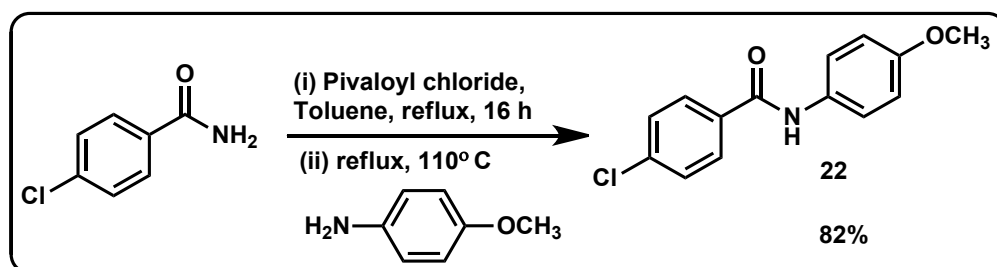

The general procedure-B stated above was followed. 4-chlorobenzamide (100 mg, 0.64 mmol), pivaloyl chloride (77 mg, 0.64mmol), 4-methoxy aniline (157.6 mg, 01.28 mmol). Pure product was obtained after column chromatography (Hexane: EtOAc (80:20)) as half-white solid in 136 mg (82% yield).

**Physical Characteristics:**

**Colour and appearance:** Half- white Solid

**M.pt:** 205 °C – 206 °C (Lit. m.pt = 209 °C – 210 °C)<sup>19</sup>

### Spectral data:

**<sup>1</sup>H NMR:** (400 MHz, DMSO-*d*<sub>6</sub>) δ: 3.75 (3H, s), 6.93 (2H, d, *J* = 12 Hz), 7.59 (2H, d, *J* = 12 Hz), 7.66 (2H, d, *J* = 12 Hz), 7.97 (2H, d, *J* = 12 Hz), 10.20 (1H, s). **<sup>13</sup>C NMR:** (100 MHz, DMSO-*d*<sub>6</sub>) δ: 55.6, 114.2, 122.5, 128.8, 129.9, 132.4, 134.1, 136.6, 156.1, 164.4. **GC-MS (EI<sup>+</sup>)** *m/z*: [M]<sup>+</sup> 261.05.

### *Transamidation of 4-nitro benzamide with 4-methoxy aniline*

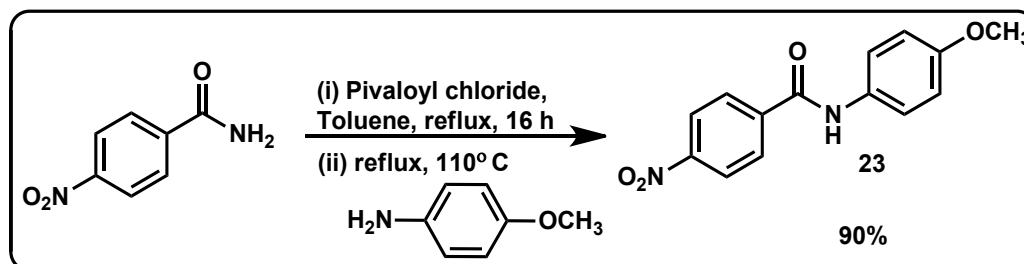

The general procedure-B stated above was followed. 4-Nitrobenzamide (100 mg, 0.60 mmol), pivaloyl chloride (72 mg, 0.60mmol), 4-methoxy aniline (147.8 mg, 1.20 mmol). Pure product was obtained after column chromatography (Hexane: EtOAc (80:20)) as green solid in 147 mg (90% yield).

### Physical Characteristics:

**Colour and appearance:** Green solid

**M.pt:** 194 °C – 196 °C (Lit. m.pt = 196 °C – 197 °C)<sup>20</sup>

### Spectral data:

**<sup>1</sup>H NMR:** (400 MHz, DMSO-*d*<sub>6</sub>) δ: 3.76 (3H, s), 6.96 (2H, d, *J* = 8 Hz), 7.77 (2H, d, *J* = 12 Hz), 8.17 (2H, d, *J* = 12 Hz), 8.37 (2H, d, *J* = 8 Hz), 10.46 (1H, s). **<sup>13</sup>C NMR:** (100 MHz, DMSO-*d*<sub>6</sub>) δ: 55.6, 114.3, 122.5, 124.0, 129.5, 132.1, 141.1, 149.5, 156.3, 163.8. **GC-MS (EI<sup>+</sup>)** *m/z*: [M]<sup>+</sup> 271.10

### *Transamidation of 4-methoxybenzamide with 4-methoxy aniline*

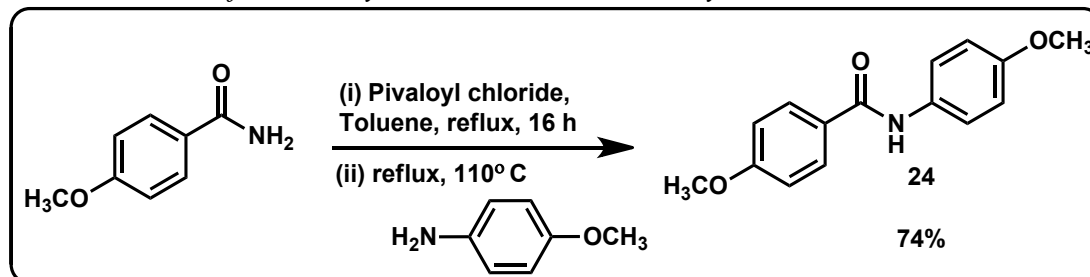

The general procedure-B stated above was followed. 4-Methoxybenzamide (100 mg, 0.66 mmol), pivaloyl chloride (79.5 mg, 0.66mmol), 4-methoxy aniline (162.6 mg, 1.32 mmol). Pure product was obtained after column chromatography (Hexane: EtOAc (80:20)) as half-white solid in 125 mg (74% yield).

**Physical Characteristics:**

**Colour and appearance:** Half white solid

**M.pt:** 199 °C – 200 °C (Lit. m.pt = 201 °C – 203 °C)<sup>21</sup>

**Spectral data:**

**<sup>1</sup>H NMR:** (400 MHz, DMSO-d<sub>6</sub>) δ: 3.74 (3H, s), 3.84 (3H, s), 6.92 (2H, d, *J* = 8 Hz), 7.05 (2H, d, *J* = 8 Hz), 7.66 (2H, d, *J* = 8 Hz), 7.95 (2H, d, *J* = 8 Hz), 9.97 (1H, s). **<sup>13</sup>C NMR:** (100 MHz, DMSO-d<sub>6</sub>) δ: 55.6, 55.8, 114.0, 114.1, 122.4, 127.5, 129.9, 132.8, 155.8, 162.2, 164.9.

**GC-MS (EI<sup>+</sup>) *m/z*:** [M]<sup>+</sup> 257.00

*Transamidation of cinnamic amide with 4-methoxy aniline*

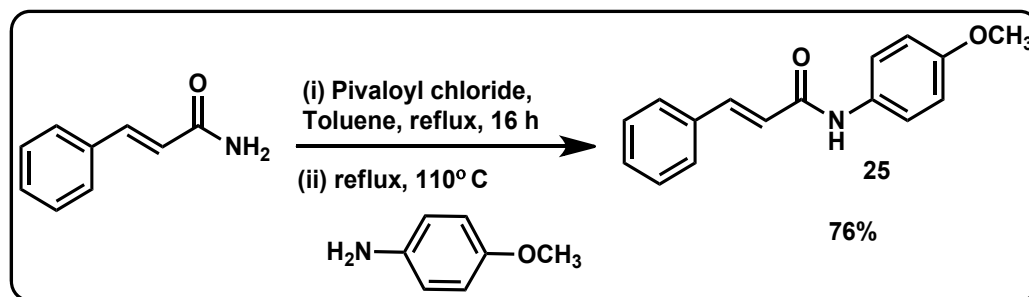

The general procedure-B stated above was followed. Cinnamic amide (100 mg, 0.67 mmol), pivaloyl chloride (80.7 mg, 0.67mmol) 4-methoxy aniline (165.0 mg, 1.34 mmol). Pure product was obtained after column chromatography (Hexane: EtOAc (80:20)) as light brown solid in 128 mg (76% yield).

**Physical Characteristics:**

**Colour and appearance:** Light brown solid

**M.pt:** 158 °C – 160 °C (Lit. m.pt = 156 °C – 157 °C)<sup>22</sup>

**Spectral data:**

**<sup>1</sup>H NMR:** (400 MHz, CDCl<sub>3</sub>) δ: 3.77 (3H, s), 6.64 (1H, d, *J* = 12 Hz), 6.85 (2H, d, *J* = 8 Hz), 7.33 (3H, d, *J* = 8 Hz), 7.45 (2H, d, *J* = 4 Hz), 7.57 (2H, d, *J* = 8 Hz), 7.73 (1H, d, *J* = 12 Hz),

8.17 (1H, s).  $^{13}\text{C}$  NMR: (100 MHz,  $\text{CDCl}_3$ )  $\delta$ : 55.4, 114.2, 121.1, 122.0, 127.9, 128.8, 129.8, 131.3, 134.7, 141.8, 156.5, 164.2. GC-MS (EI $^+$ )  $m/z$ :  $[\text{M}]^+$  253.15

*Transamidation of piperic amide with 4-methoxy aniline*

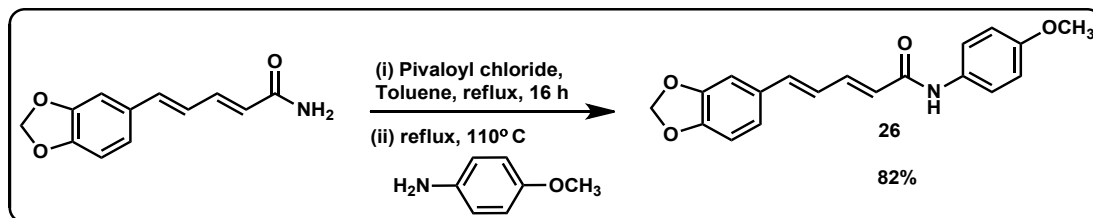

The general procedure-B stated above was followed. Piperic amide (100 mg, 0.46 mmol), pivaloyl chloride (55 mg, 0.46 mmol), 4-methoxy aniline (113.3 mg, 0.92 mmol). Pure product was obtained after column chromatography (Hexane: EtOAc (80:20)) as pale-yellow solid in 128 mg (82% yield).

**Physical Characteristics:**

**Colour and appearance:** Pale yellow solid

**M.pt:** 200 °C – 201 °C

**Spectral data:**

$^1\text{H}$  NMR: (400 MHz,  $\text{DMSO-d}_6$ )  $\delta$ : 3.67 (3H, s), 5.99 (2H, s), 6.21 (1H, d,  $J = 16$  Hz), 6.82-6.98 (6H, m), 7.23 (2H, t,  $J = 12$  Hz), 7.54 (2H, d,  $J = 8$  Hz), 9.92 (1H, s).  $^{13}\text{C}$  NMR: (100 MHz,  $\text{DMSO-d}_6$ )  $\delta$ : 60.3, 106.5, 110.9, 113.6, 119.1, 125.8, 128.0, 129.7, 130.3, 136.0, 137.7, 143.7, 145.7, 153.1, 160.4, 168.6. HRMS (ESI-MS)  $m/z$ : Calculated for  $\text{C}_{19}\text{H}_{18}\text{NO}_4$   $[\text{M}+\text{H}]^+$  324.1235, found: 324.1246.

**General procedure C:** Transamidation of *N*-methyl-*N*-pivaloylbenzamide with 4-methoxy aniline

To the *N*-methyl-*N*-pivaloylbenzamide in toluene, 4-methoxy aniline (2 eq.), was added and refluxed. Progress of the reaction was monitored by TLC. Starting material consumed in 1h - 1.5h. After completion, the reaction mixture was washed with 5% HCl solution, 5%  $\text{NaHCO}_3$  solution, water. The organic layer was dried over anhyd.  $\text{Na}_2\text{SO}_4$  and concentrated under reduced pressure. Pure product was obtained after column chromatography.

**Table 4:** Transamidation of secondary amides with 4-methoxy aniline

| S.No | Amide                                                                             | Product                                                                           | Yield (%) | Time (h) |
|------|-----------------------------------------------------------------------------------|-----------------------------------------------------------------------------------|-----------|----------|
| 1.   | 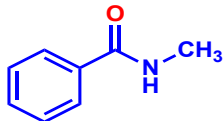 |  | 85        | 1        |

*Transamidation of N-methyl benzamide with 4-methoxy aniline*

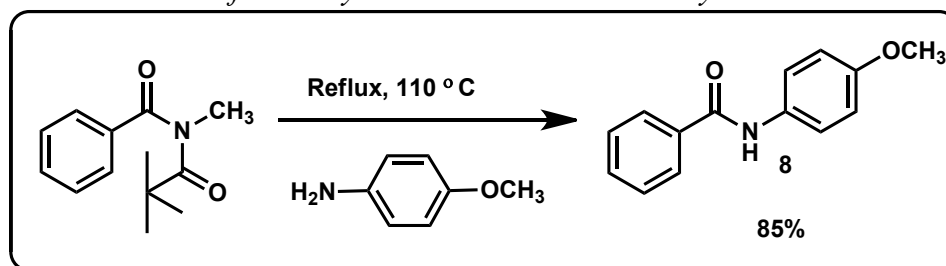

The general procedure-C stated above was followed. *N*-methyl-*N*-pivaloylbenzamide (100 mg, 0.45 mmol), 4-methoxy aniline (110 mg, 0.90 mmol). Pure product was obtained after column chromatography half white solid in 142 mg (85% yield).

*Synthesis of 4-methyl N-pivaloyl benzamide*

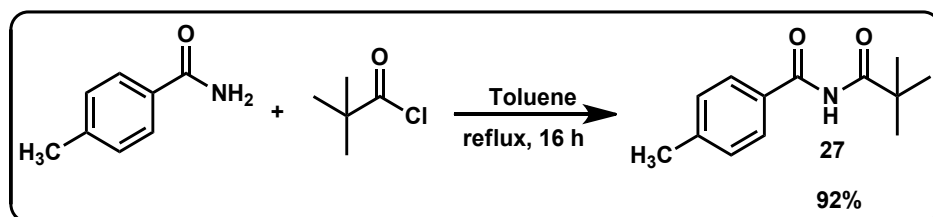

To a stirred solution of 4- methyl benzamide (250 g, 1.84 mmol), in 10 mL of toluene at room temperature, pivaloyl chloride (222 mg, 1.84 mmol) was added dropwise. After addition, the reaction mixture was refluxed for 16 h. Progress of the reaction was monitored by TLC [hexane-EtOAc (7:3)]. After completion, the reaction mixture was washed with 5% NaHCO<sub>3</sub> solution and water. The organic layer was dried over anhyd. Na<sub>2</sub>SO<sub>4</sub> and concentrated under reduced



pressure. Pure product was obtained after column chromatography as white solid 371 mg (85% yield).

**Spectral data:**

**Physical Characteristics:**

**Colour and appearance:** White solid

**<sup>1</sup>H NMR:** (400 MHz, DMSO-d<sub>6</sub>) δ: 1.22 (9H, s), 2.38 (3H, s), 7.31 (2H, d, *J* = 8 Hz), 7.62 (2H, d, *J* = 8 Hz), 10.29 (1H, s).

**<sup>13</sup>C NMR:** (100 MHz, DMSO-d<sub>6</sub>) δ: 21.5, 26.8, 129.0, 129.3, 132.1, 143.1, 168.2, 177.6.

*Synthesis of N-methyl N-pivaloyl benzamide*

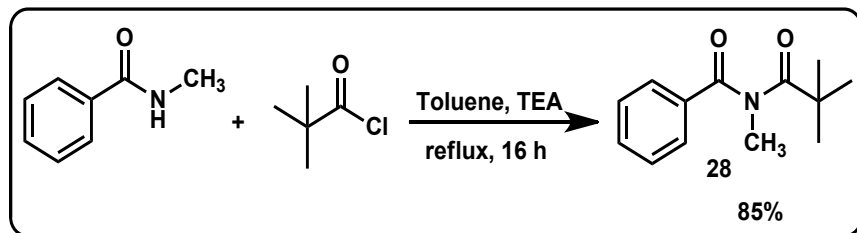

To a stirred solution of *N*-methyl benzamide (250 g, 1.84 mmol), triethylamine (371mg, 3.68 mmol) in 10 mL of toluene at room temperature, pivaloyl chloride (222 mg, 1.84 mmol) was added dropwise. After addition, the reaction mixture was heated upto 80 C for 24 h. Progress of the reaction was monitored by TLC [hexane-EtOAc (8:2)]. After completion, the reaction mixture was washed with with 5% HCl solution, 5% NaHCO<sub>3</sub> solution and water. The organic layer was dried over anhyd. Na<sub>2</sub>SO<sub>4</sub> and concentrated under reduced pressure. Pure product was obtained after column chromatography as white solid 342 mg (85% yield).

**Colour and appearance:** Half-White solid

**Spectral data:**

**<sup>1</sup>H NMR:** (400 MHz, DMSO-d<sub>6</sub>) δ: 1.26 (9H, s), 3.08 (3H, s), 7.51 (2H, t, *J* = 8 Hz), 7.58 – 7.62 (1H, m), 7.67 (2H, t, *J* = 4 Hz).

**<sup>13</sup>C NMR:** (100 MHz, DMSO-d<sub>6</sub>) δ: 28.4, 35.0, 42.5, 129.0, 129.2, 132.7, 134.8, 174.9, 186.1.

## Competitive study

*N*-pivaloyl activated secondary amide Vs tertiary amide

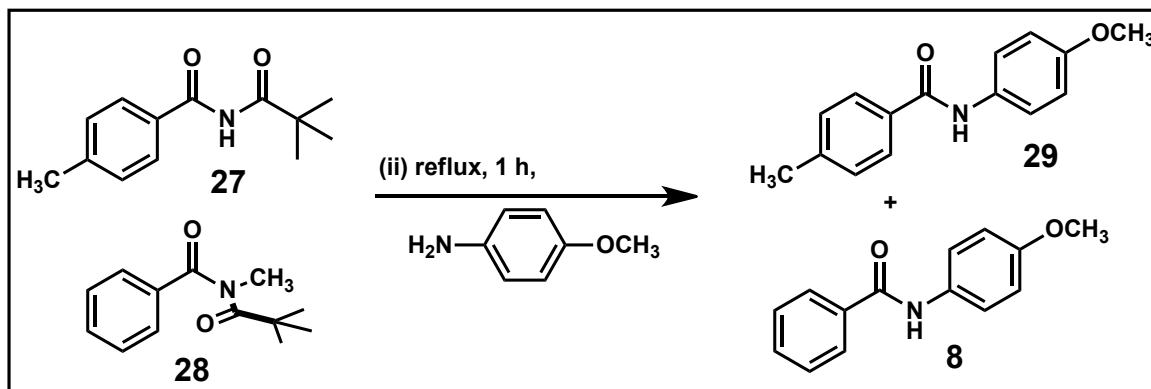

To a stirred solution of 4-methyl benzamide (50 mg, 0.228 mmol, 0.5 eq.), and *N*-methyl benzamide (50 mg, 0.228 mmol, 0.5 eq.) in toluene (3 mL). To the above mixture p-anisidine (56.3 mg, 0.456 mmol, 2 eq.) was added, the reaction mixture was refluxed for 1 h. After completion, the reaction mixture was washed with 5% HCl solution to remove excess amine and a small filtration column was performed to remove the by-products. The resulted crude reaction mixture was characterized by <sup>1</sup>H NMR.

### <sup>1</sup>H NMR Spectral data of the selectivity reaction I

**29- <sup>1</sup>H NMR:** (400 MHz, DMSO-d<sub>6</sub>) δ: 2.38 (3H, s), 3.74 (3H, s), 6.92 (2H, d, *J* = 4 Hz), 7.32 (2H, d, *J* = 8 Hz), 7.66 (2H, d, *J* = 4 Hz), 7.86 (2H, d, *J* = 8 Hz), 10.05 (1H, s).

**8- <sup>1</sup>H NMR:** (400 MHz, DMSO-d<sub>6</sub>) δ: 3.75 (2.6 H, s), 6.94 (1.6 H, d, *J* = 4 Hz), 7.50 – 7.60 (2.4 H, m), 7.69 (1.6 H, d, *J* = 4 Hz), 7.94 (1.6 H, d, *J* = 4 Hz), 10.14 (0.7 H, s).

**GC-MS spectra of competitive reaction between primary Vs secondary amide against anisidine**

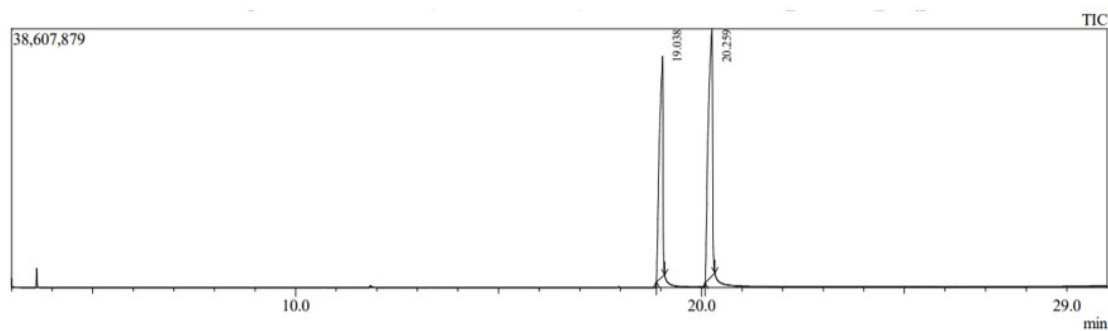

Peak Report TIC

| Peak# | R.Time | I.Time | F.Time | Area      | Area% | Height   | Height% | A/H  | Mark | Name |
|-------|--------|--------|--------|-----------|-------|----------|---------|------|------|------|
| 1     | 19.038 | 18.890 | 19.095 | 198057233 | 42.46 | 32864509 | 47.15   | 6.03 |      |      |
| 2     | 20.259 | 20.090 | 20.330 | 268424058 | 57.54 | 36838961 | 52.85   | 7.29 |      |      |

Library

<< Target >>

Line#:1 R.Time:19.040(Scan#:3209) MassPeaks:142  
 RawMode:Averaged 19.035-19.045(3208-3210) BasePeak:105.15(7696208)  
 BG Mode:Calc. from Peak Group 1 - Event 1 Scan

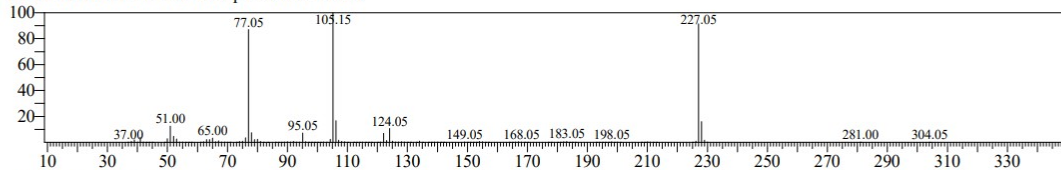

Hit#:1 Entry:99092 Library:NIST17.lib  
 SI:87 Formula:C14H13NO2 CAS:7472-54-0 MolWeight:227 RetIndex:2056  
 CompName:p-Benzamisidine

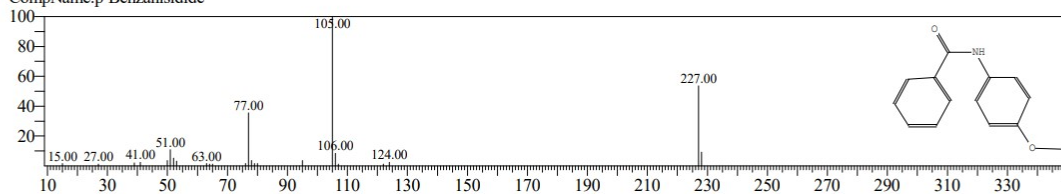

<< Target >>

Line#:2 R.Time:20.260(Scan#:3453) MassPeaks:165  
 RawMode:Averaged 20.255-20.265(3452-3454) BasePeak:119.25(7723085)  
 BG Mode:Calc. from Peak Group 1 - Event 1 Scan

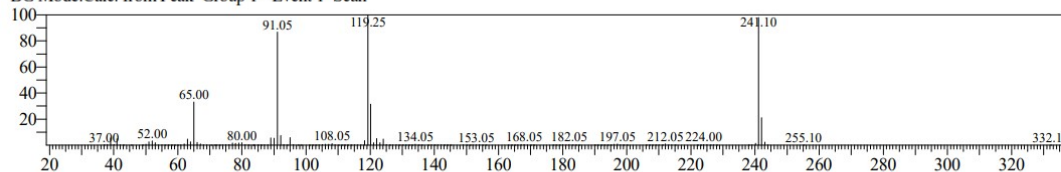

Hit#:1 Entry:113337 Library:NIST17.lib  
 SI:82 Formula:C15H15NO2 CAS:0-00-0 MolWeight:241 RetIndex:2169  
 CompName:Benamide, N-(4-methoxyphenyl)-3-methyl-

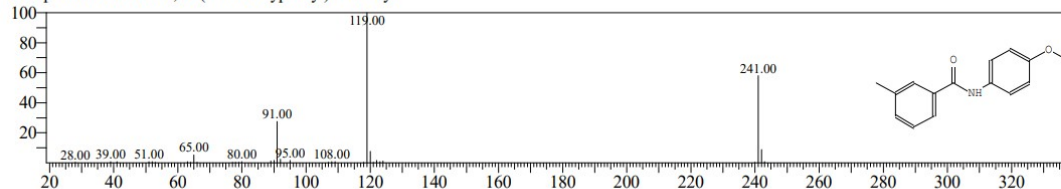

**Figure S2: Chromatogram and mass spectra of competitive study.**

### Stability of *N*-pivaloyl benzamide

- (i) **General procedure for stability studies:** To solution of *N*-pivaloyl benzamide (0.12 mmol, 1.0 eq.) in CH<sub>3</sub>CN (10 mL) water or acid as indicated was added at room temperature, and the reaction was stirred vigorously at a given temperature. After the indicated time, progress of the reaction was monitored by TLC [hexane-EtOAc (7:3)].
- (ii) **General procedure for solvent stability studies.** The *N*-pivaloyl benzamide (0.12 mmol, 1.0 eq.) was dissolved in an DMSO (5mL), and the solution was stirred vigorously at a given temperature. After the indicated time, progress of the reaction was monitored by TLC [hexane-EtOAc (7:3)].

**Table 5:** Stability of *N*-pivaloyl benzamide under various conditions

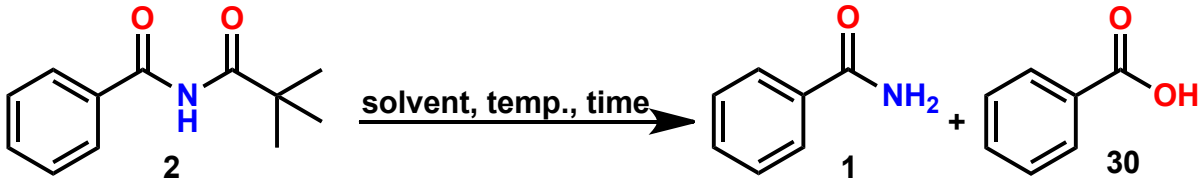

The reaction scheme shows the hydrolysis of *N*-pivaloyl benzamide (2) to benzamide (1) and pivalic acid (30). The reaction is labeled "solvent, temp., time".

| S.No | Solvent (eq.)            | temp (°C)   | time (h) | Yield (%) |
|------|--------------------------|-------------|----------|-----------|
| 1.   | H <sub>2</sub> O (5 eq.) | RT, 80, 100 | 24       | 0         |
| 2.   | con.HCl (2 eq.)          | RT          | 24       | 0         |
| 3.   | con.HCl (2 eq.)          | a) 80       | 3        | 70        |
|      |                          | b) 100      | 1        | 95        |
| 4.   | DMSO (excess)            | RT, 80, 100 | 24       | 0         |

## Reference

- 1 C. Mei, Y. Hu and W. Lu, *Synthesis*, 2018, **50**, 2999–3005.
- 2 D. D. Sanz Sharley and J. M. J. Williams, *Tetrahedron Letters*, 2017, **58**, 4090–4093.
- 3 M. Rezaei, K. Amani and K. Darvishi, *Catalysis Communications*, 2017, **91**, 38–42.
- 4 A. Poeschl and D. M. Mountford, *Org. Biomol. Chem.*, 2014, **12**, 7150–7158.
- 5 S. Sobhani, Z. M. Falatoni, S. Asadi and M. Honarmand, *Catal Lett*, 2016, **146**, 255–268.
- 6 R. Azadi and Z. Motamedpoor, *LOC*, 2018, **15**, 801–804.
- 7 Y. Wang, Z. Wu, Q. Li, B. Zhu and L. Yu, *Catal. Sci. Technol.*, 2017, **7**, 3747–3757.
- 8 C. A. D. Caiuby, M. P. de Jesus and A. C. B. Burtoloso, *J. Org. Chem.*, 2020, **85**, 7433–7445.
- 9 C. Li, M. Wang, X. Lu, L. Zhang, J. Jiang and L. Zhang, *ACS Sustainable Chem. Eng.*, 2020, **8**, 4353–4361.
- 10 A. Mishra, S. Singh and V. Srivastava, *Asian Journal of Organic Chemistry*, 2018, **7**, 1600–1604.
- 11 J.-E. Won, H.-K. Kim, J.-J. Kim, H.-S. Yim, M.-J. Kim, S.-B. Kang, H.-A. Chung, S.-G. Lee and Y.-J. Yoon, *Tetrahedron*, 2007, **63**, 12720–12730.
- 12 P. K. Sahu, P. K. Sahu, R. Gupta, M. Messali, S. M. Almutairi, P. L. Sahu and D. D. Agarwal, *ACS Omega*, 2018, **3**, 18976–18983.
- 13 S. A. Rzhavskiy, A. A. Agheshina, G. A. Chesnokov, P. S. Gribanov, M. A. Topchiiy, M. S. Nechaev and A. F. Asachenko, *RSC Adv.*, 2019, **9**, 1536–1540.
- 14 J.-S. Li, Y. Xue, P.-Y. Li, Z.-W. Li, C.-H. Lu, W.-D. Liu, H.-L. Pang, D.-H. Liu, M.-S. Lin, B.-B. Luo and W. Jiang, *Res Chem Intermed*, 2015, **41**, 2235–2247.
- 15 R. Otsuka, K. Maruhashi and T. Ohwada, *Synthesis*, 2018, **50**, 2041–2057.
- 16 S. Das, S. Ray, A. B. Ghosh, P. K. Samanta, S. Samanta, B. Adhikary and P. Biswas, *Applied Organometallic Chemistry*, 2018, **32**, e4199.
- 17 P. C. S. Costa, M. R. O. Barsottini, M. L. L. Vieira, B. A. Pires, J. S. Evangelista, A. C. M. Zeri, A. F. Z. Nascimento, J. S. Silva, M. F. Carazzolle, G. A. G. Pereira, M. L. Sforça, P. C. M. L. Miranda and S. A. Rocco, *Journal of Molecular Structure*, 2020, **1208**, 127903.
- 18 M. Gergely and L. Kollár, *Tetrahedron*, 2018, **74**, 2030–2040.
- 19 W. K. Su, Y. Zhang, J. J. Li and P. Li, *Organic Preparations and Procedures International*, 2008, **40**, 543–550.
- 20 B. Nammalwar, N. P. Muddala, F. M. Watts and R. A. Bunce, *Tetrahedron*, 2015, **71**, 9101–9111.
- 21 Y. Gao, J. Liu, Z. Li, T. Guo, S. Xu, H. Zhu, F. Wei, S. Chen, H. Gebru and K. Guo, *J. Org. Chem.*, 2018, **83**, 2040–2049.
- 22 A. D. Kosal, E. E. Wilson and B. L. Ashfeld, *Angewandte Chemie International Edition*, 2012, **51**, 12036–12040.

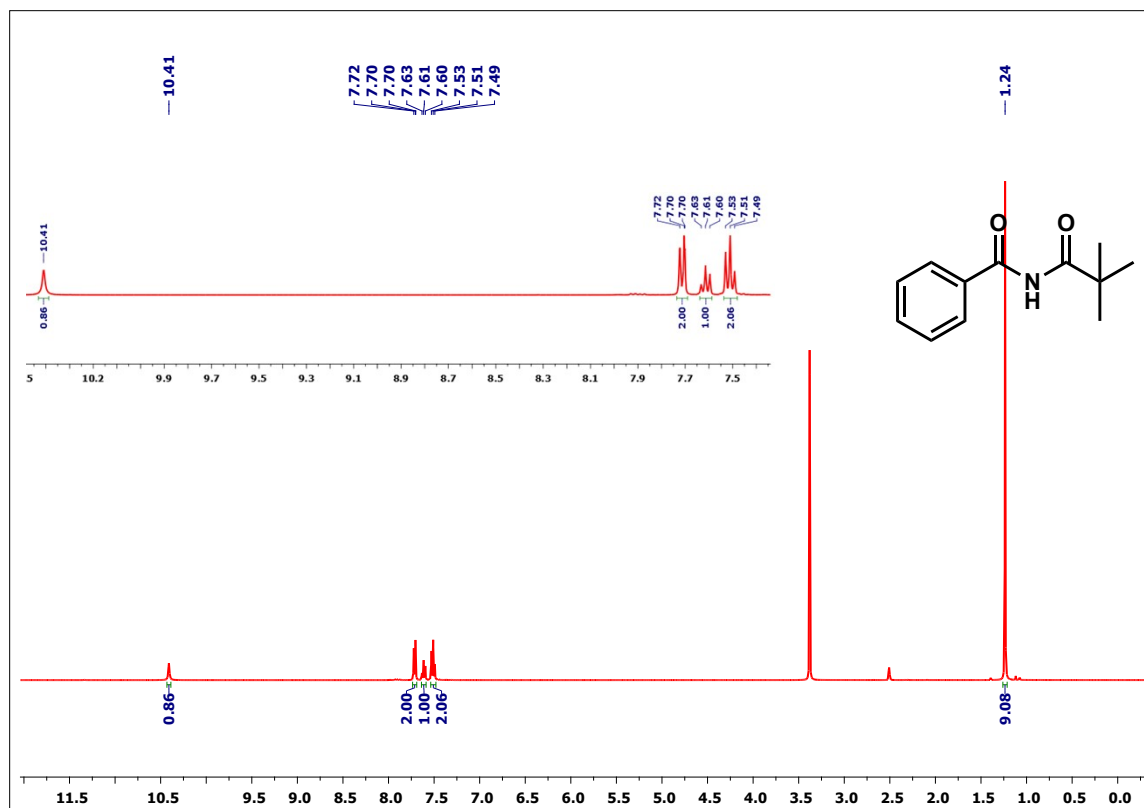

Figure S3: 400 MHz  $^1\text{H}$  NMR spectrum of *N*-pivaloyl benzamide **1** in  $\text{DMSO-d}_6$

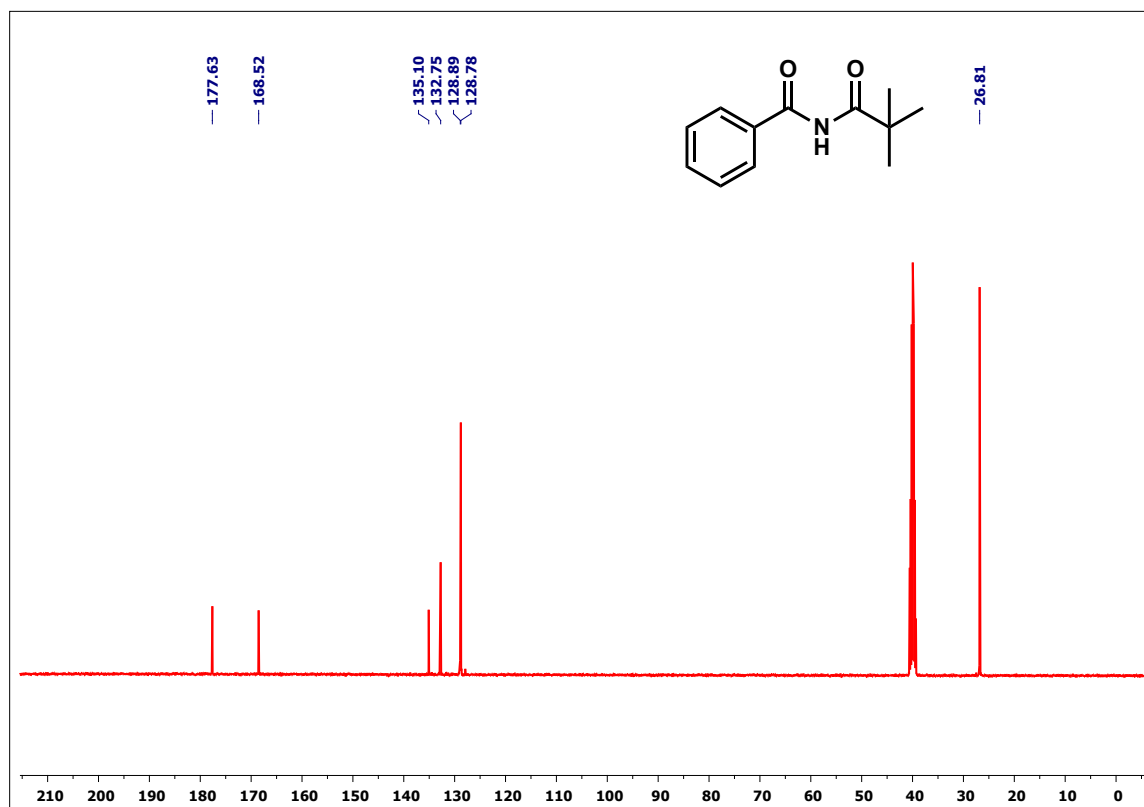

Figure S4: 100 MHz  $^{13}\text{C}$  NMR spectrum of *N*-pivaloyl benzamide **1** in  $\text{DMSO-d}_6$

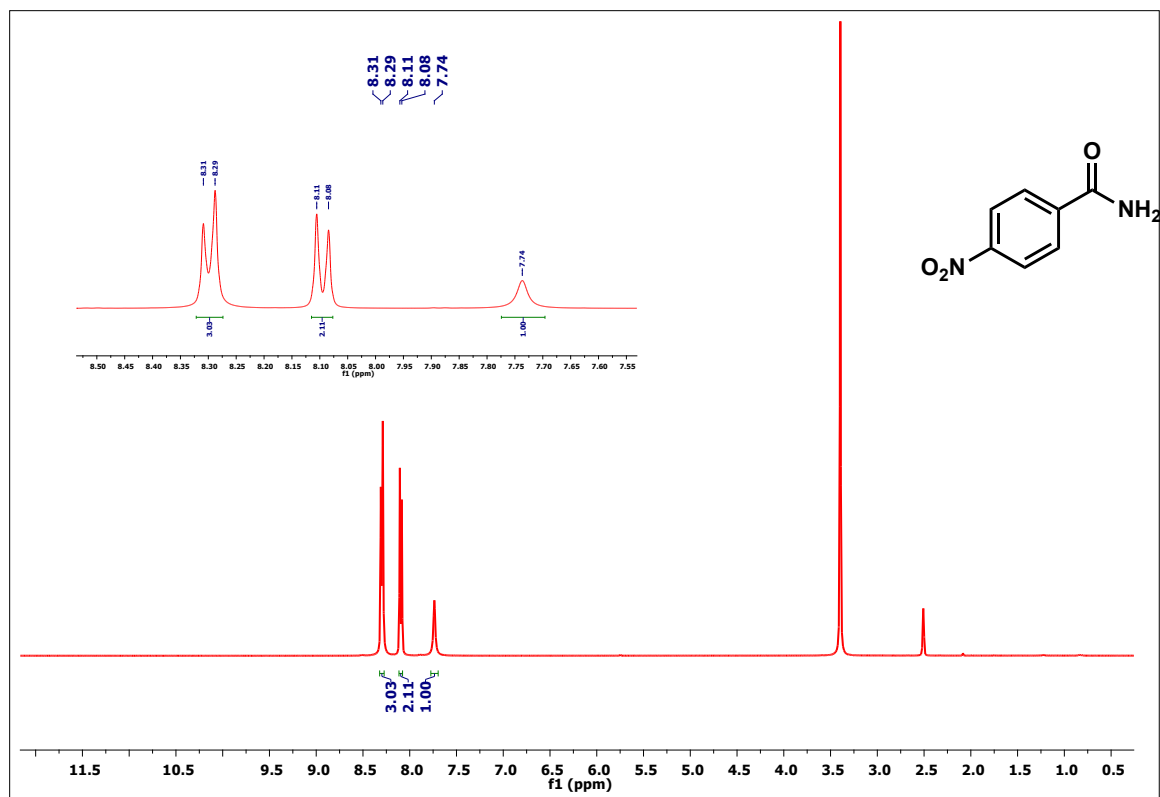

Figure S5: 400 MHz  $^1\text{H}$  NMR spectrum of 4-nitro benzamide in  $\text{DMSO-d}_6$

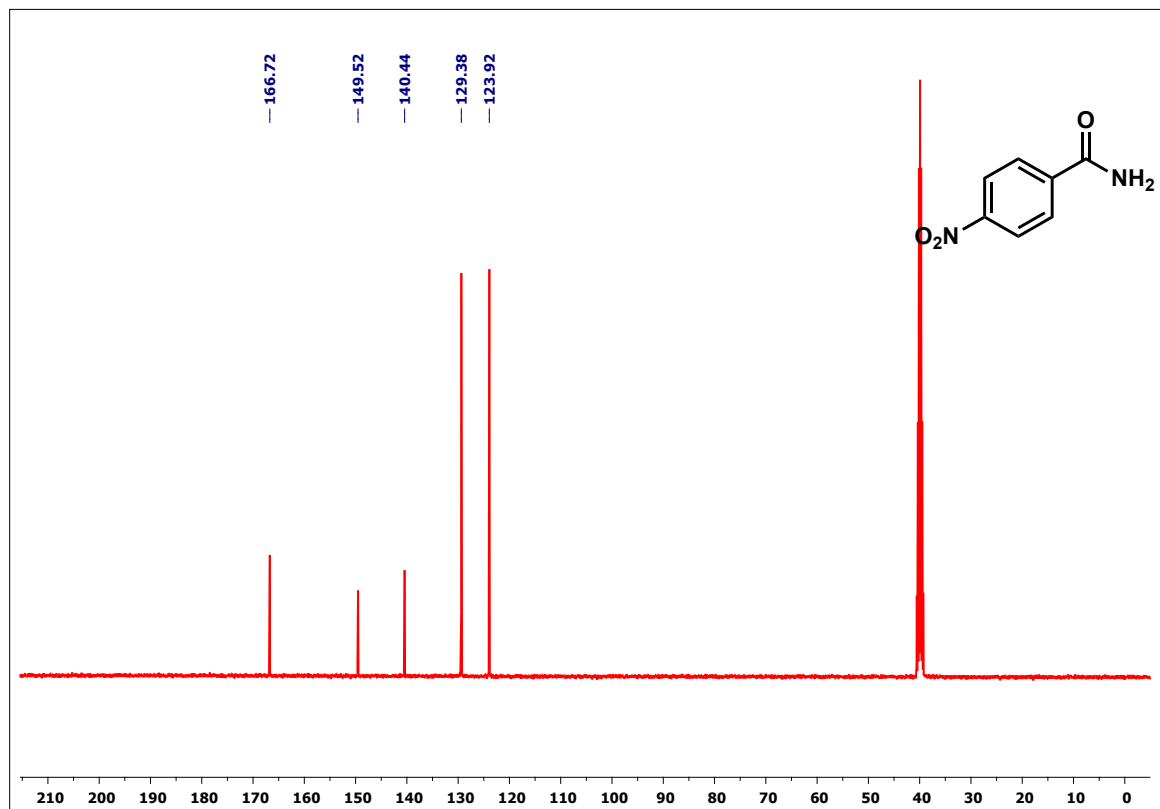

Figure S6: 100 MHz  $^{13}\text{C}$  NMR spectrum of 4-nitro benzamide in  $\text{DMSO-d}_6$

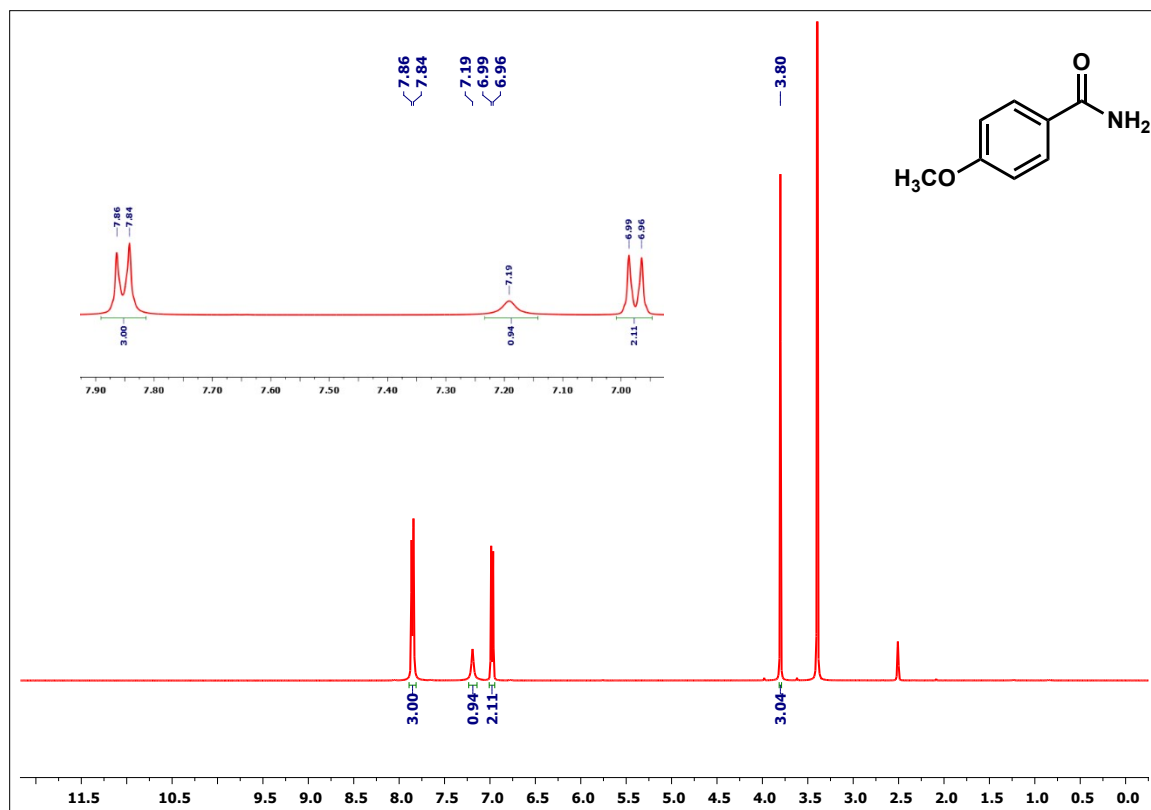

Figure S7: 400 MHz  $^1\text{H}$  NMR spectrum of 4-methoxy benzamide in  $\text{DMSO-d}_6$

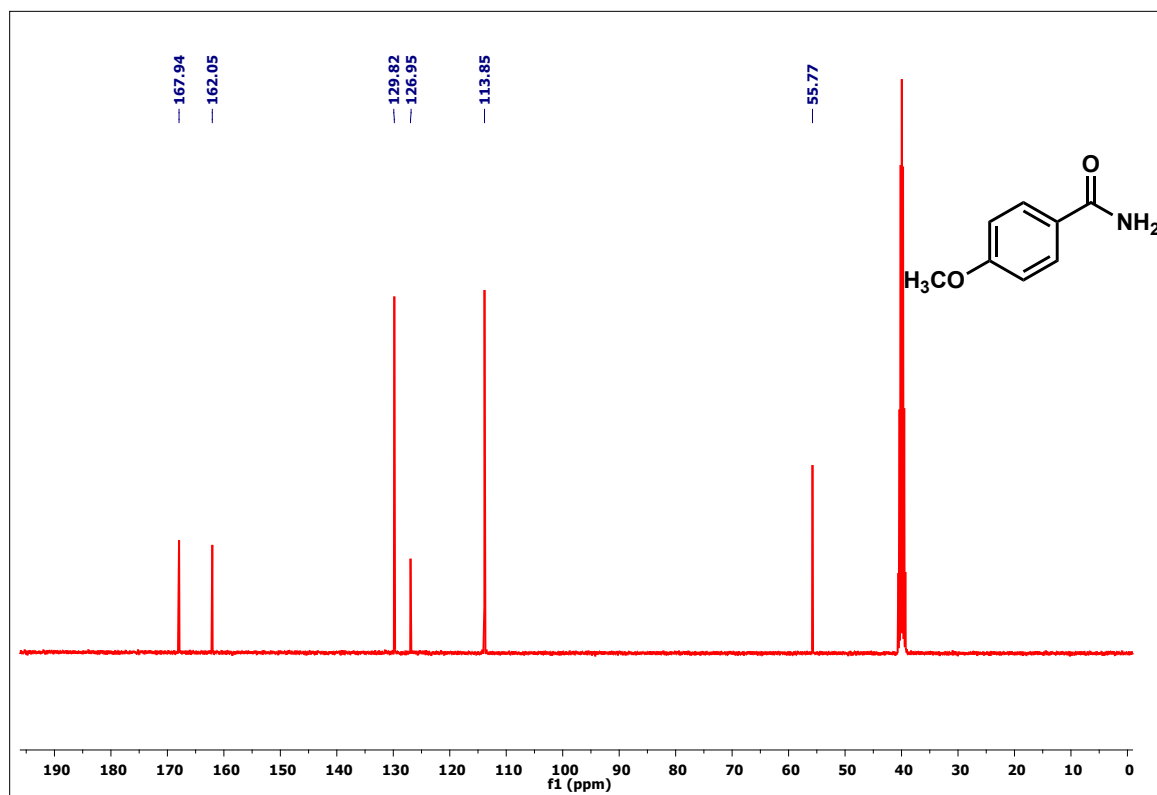

Figure S8: 100 MHz  $^{13}\text{C}$  NMR spectrum of 4-methoxy benzamide in  $\text{DMSO-d}_6$



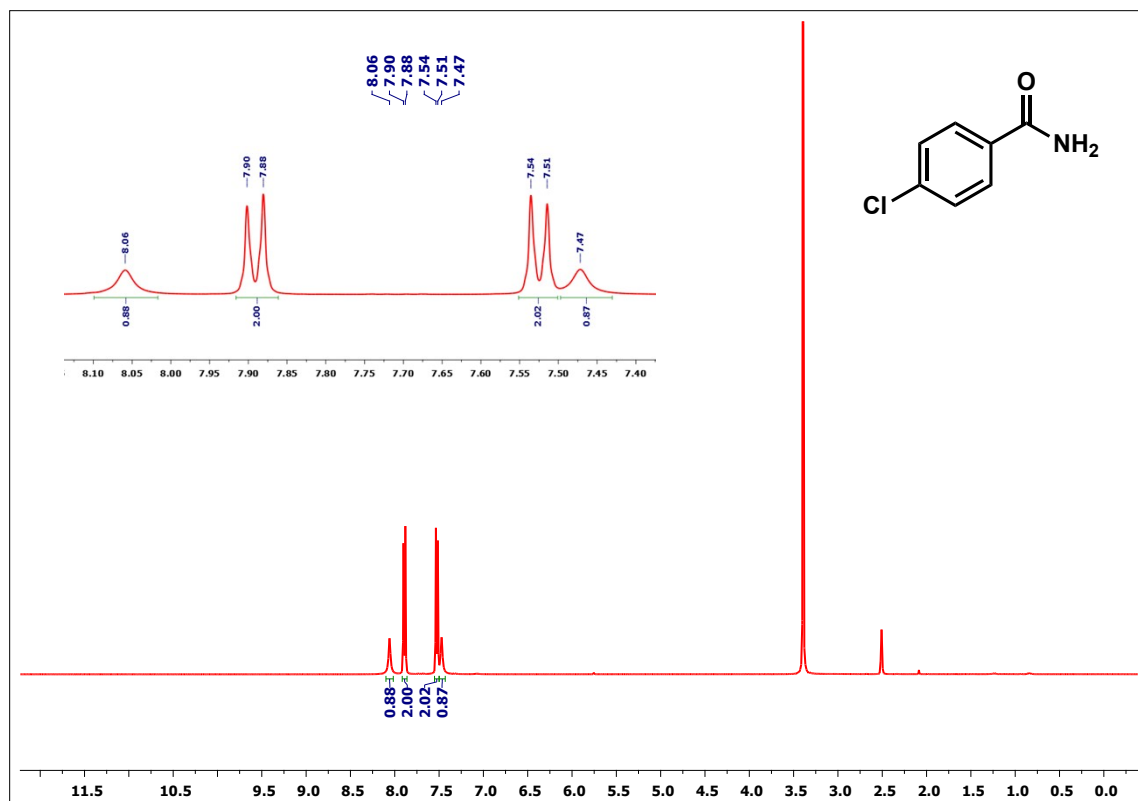

Figure S9: 400 MHz  $^1\text{H}$  NMR spectrum of 4-chloro benzamide in  $\text{DMSO-d}_6$

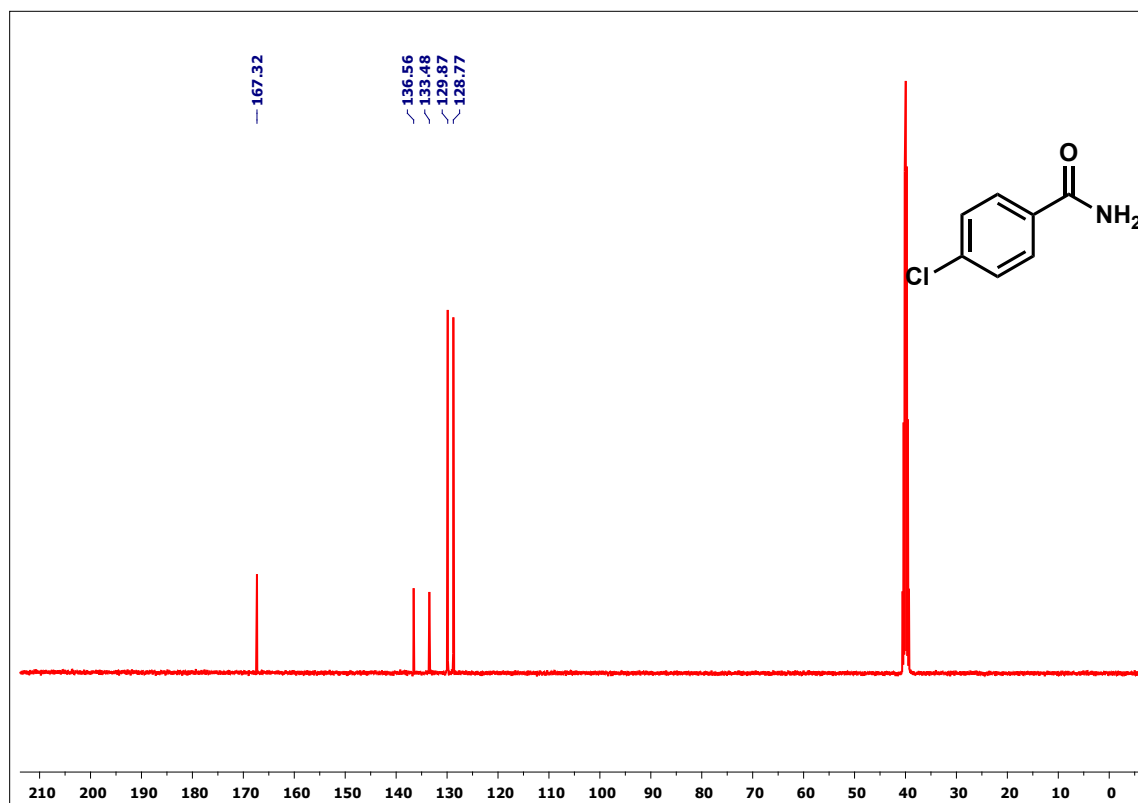

Figure S10: 100 MHz  $^{13}\text{C}$  NMR spectrum of 4-chloro benzamide in  $\text{DMSO-d}_6$

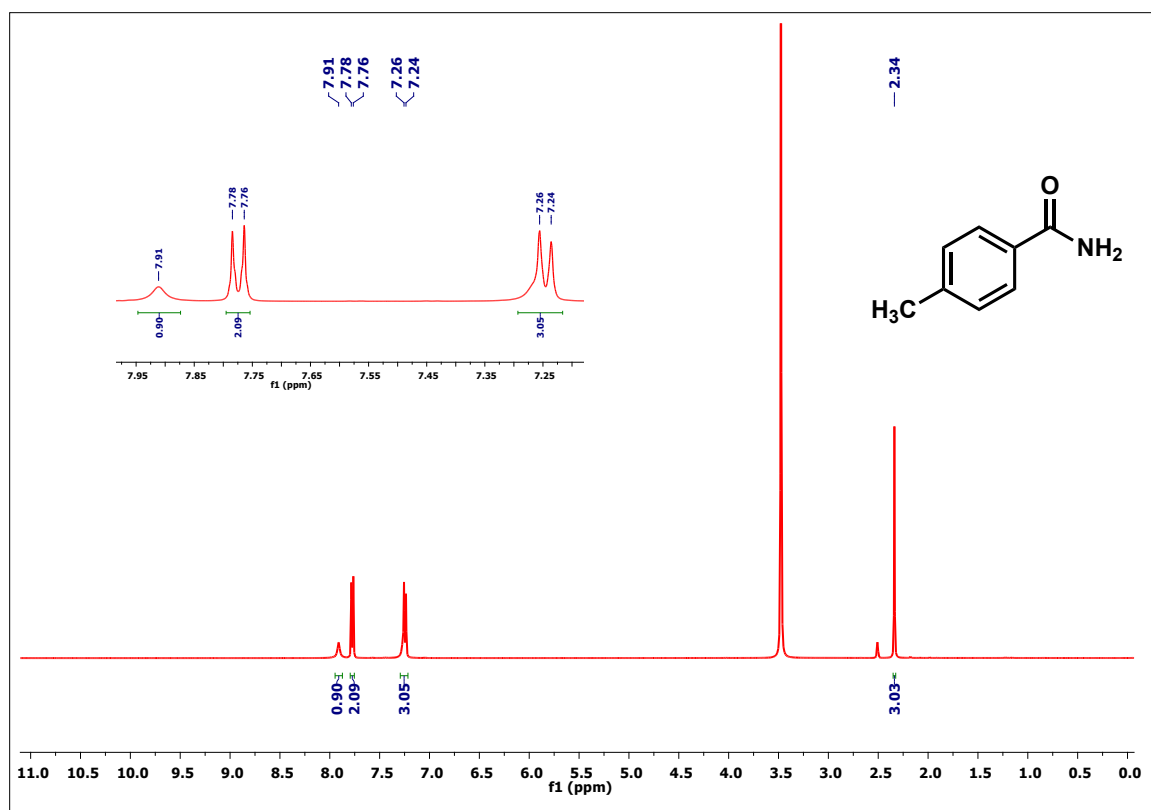

**Figure S11:** 400 MHz  $^1\text{H}$  NMR spectrum of 4-methyl benzamide in  $\text{DMSO-d}_6$

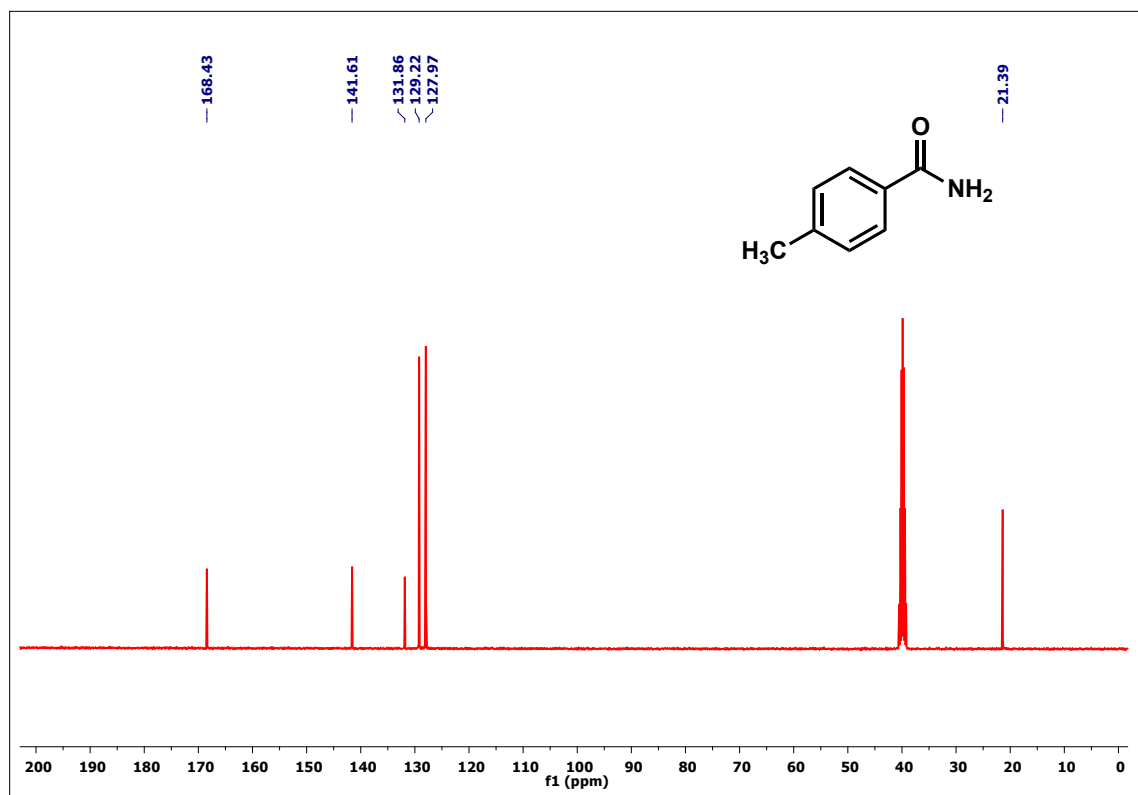

**Figure S12:** 100 MHz  $^{13}\text{C}$  NMR spectrum of 4-methyl benzamide in  $\text{DMSO-d}_6$

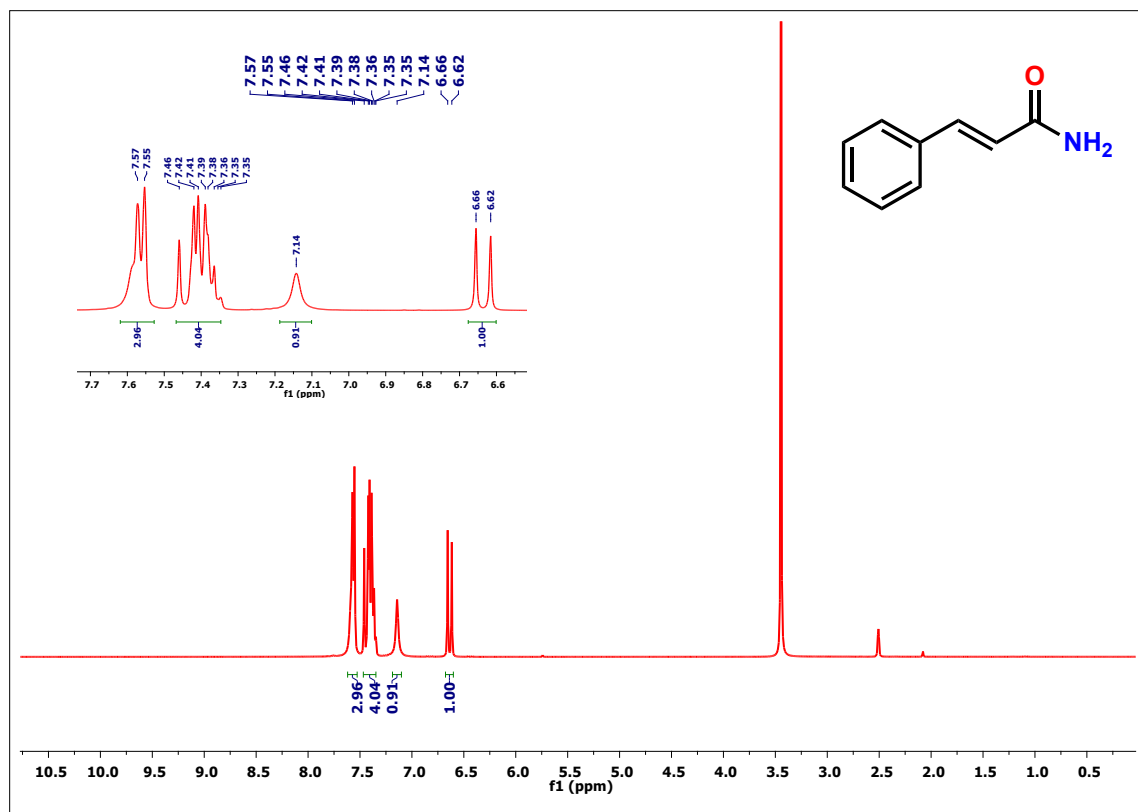

Figure S13: 400 MHz  $^1\text{H}$  NMR spectrum of cinnamamide in  $\text{DMSO-d}_6$

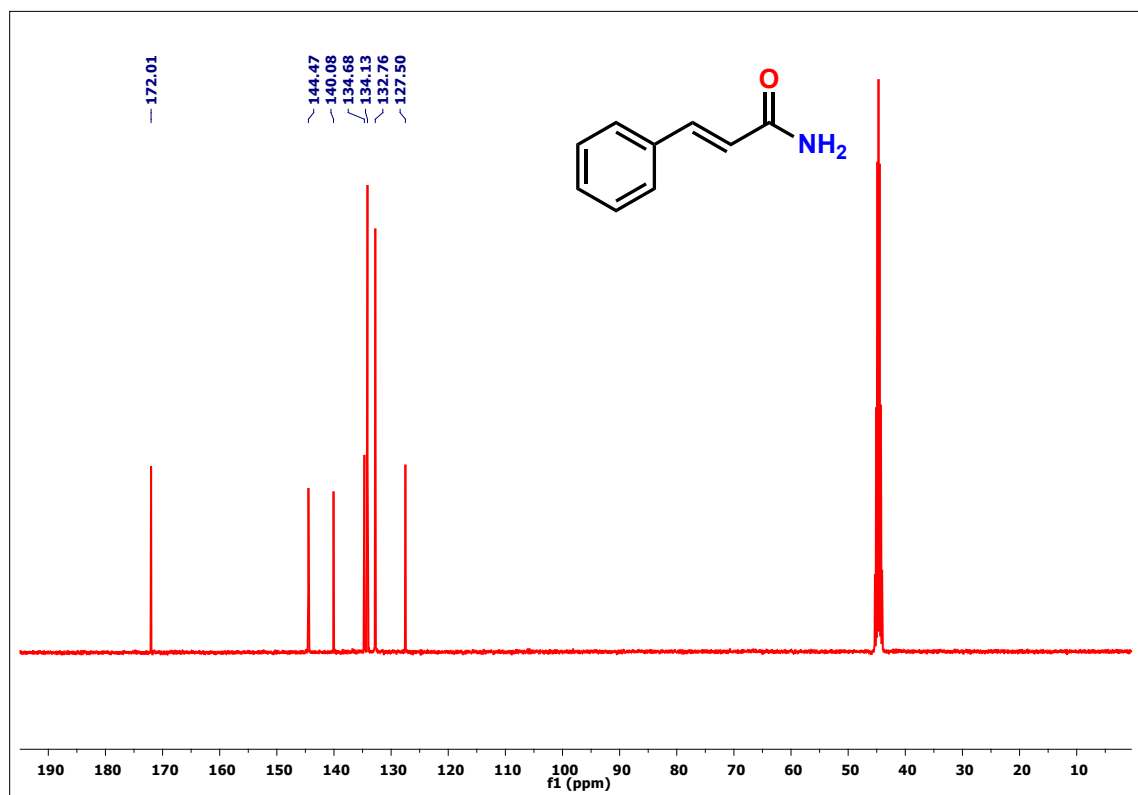

Figure S14: 100 MHz  $^{13}\text{C}$  NMR spectrum of cinnamamide in  $\text{DMSO-d}_6$

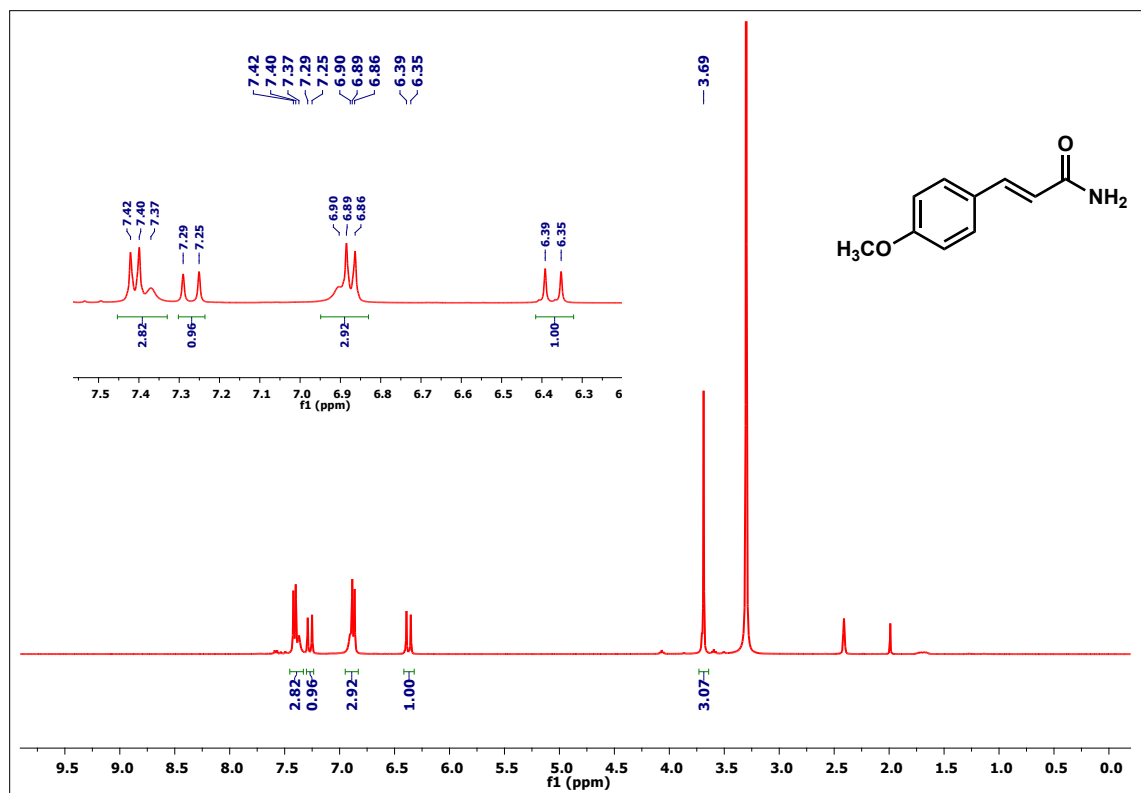

Figure S15: 400 MHz  $^1\text{H}$  NMR spectrum of 4-methoxy cinnamamide in  $\text{DMSO-d}_6$

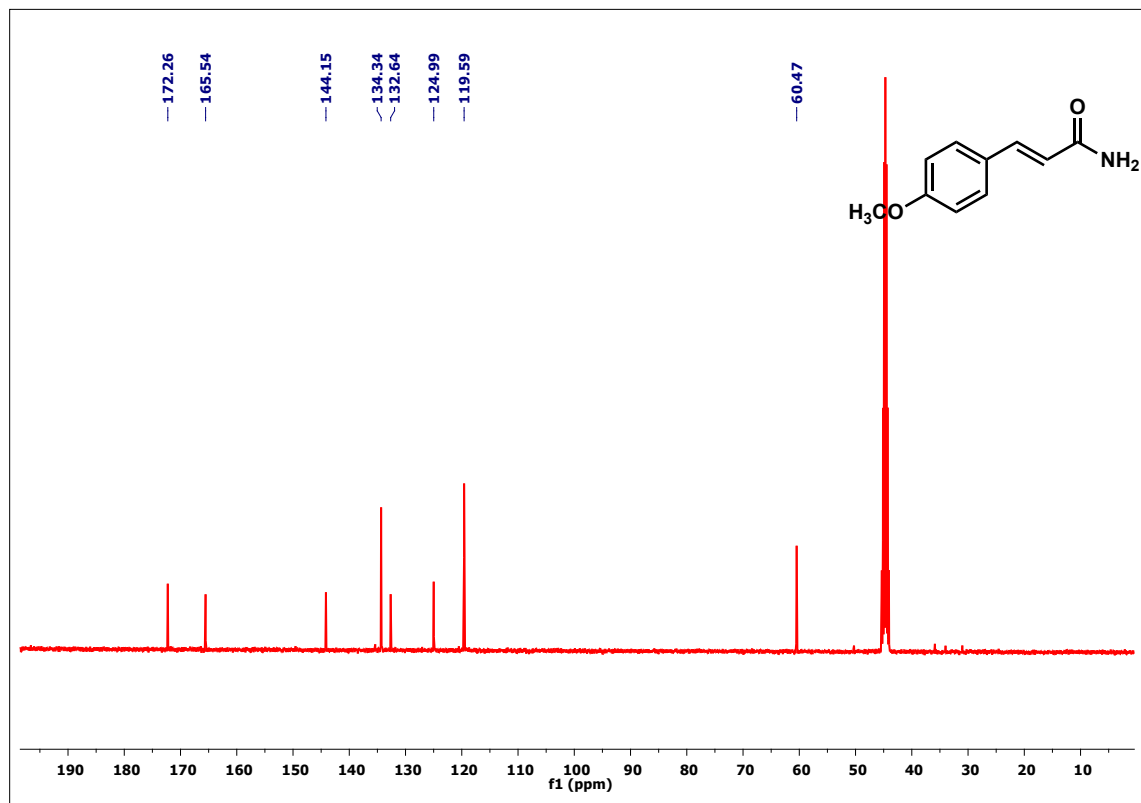

Figure S16: 100 MHz  $^{13}\text{C}$  NMR spectrum of 4-methoxy cinnamamide in  $\text{DMSO-d}_6$

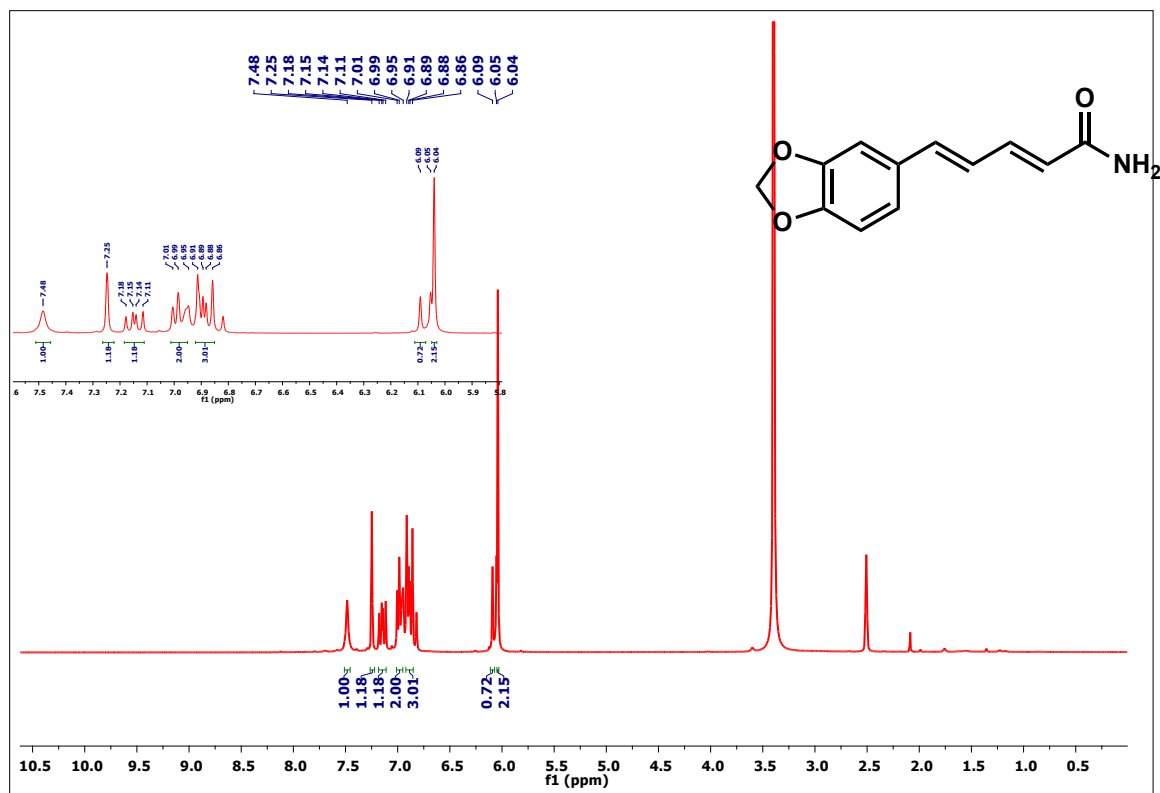

Figure S17: 400 MHz  $^1\text{H}$  NMR spectrum of pipericamide in  $\text{DMSO-d}_6$

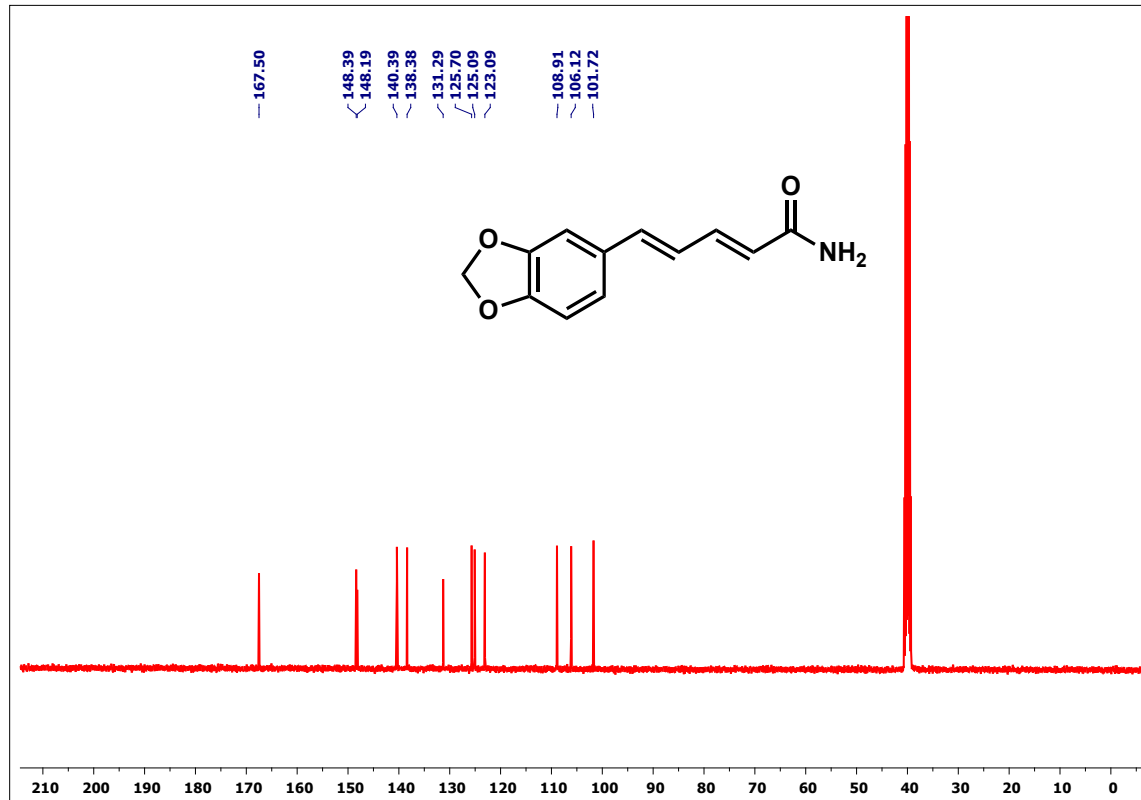

Figure S18: 100 MHz  $^{13}\text{C}$  NMR spectrum of pipericamide in  $\text{DMSO-d}_6$

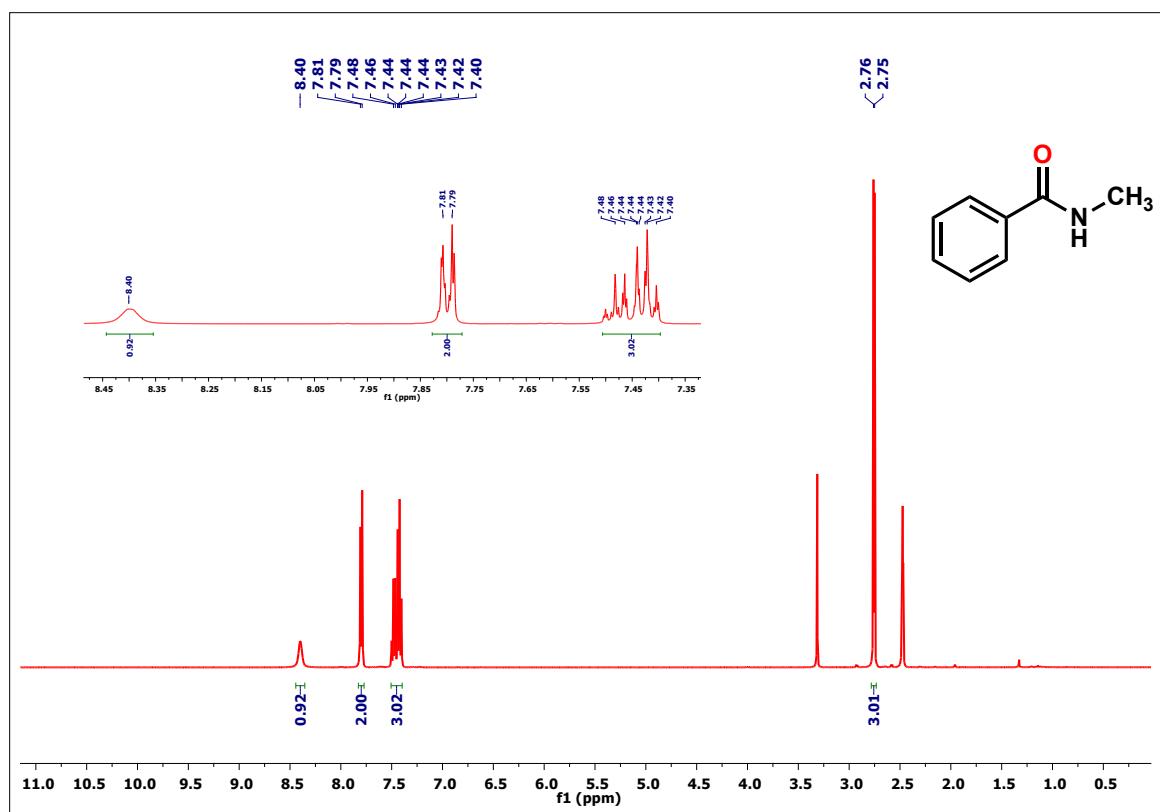

Figure S19: 400 MHz  $^1\text{H}$  NMR spectrum of *N*-methyl benzamide in  $\text{DMSO-d}_6$

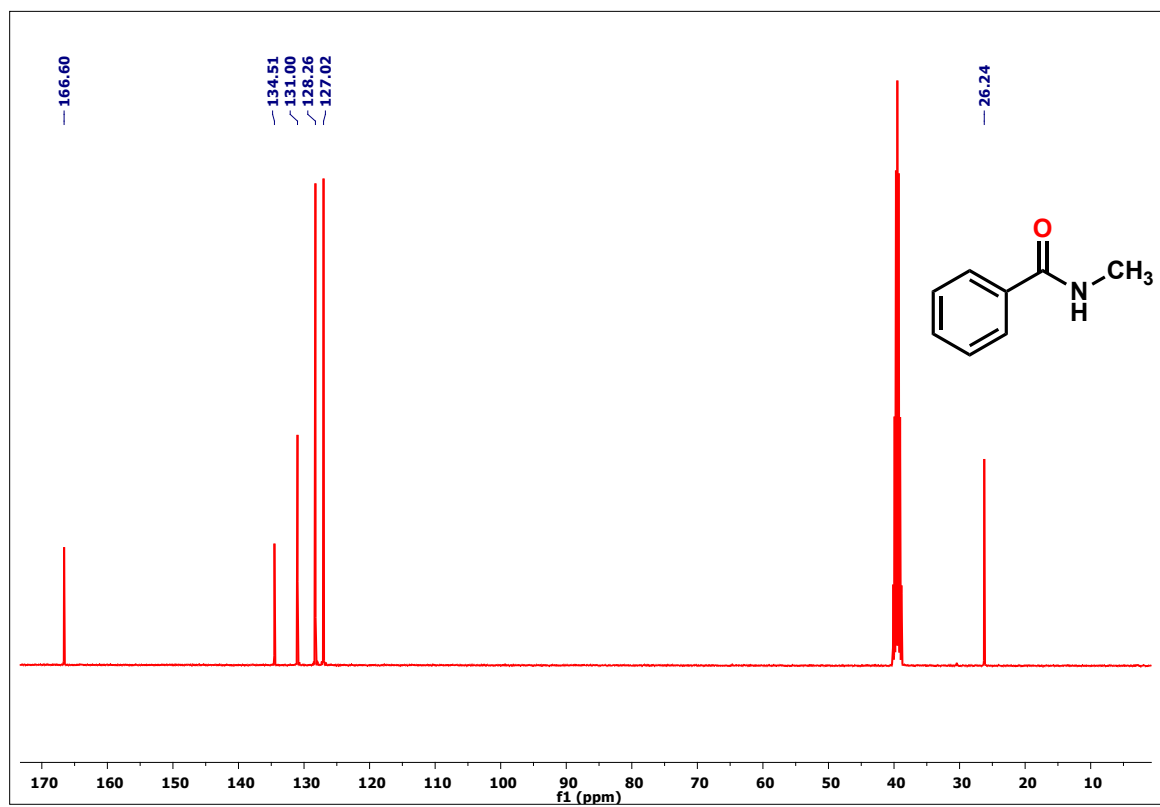

Figure S20: 100 MHz  $^{13}\text{C}$  NMR spectrum of *N*-methyl benzamide in  $\text{DMSO-d}_6$

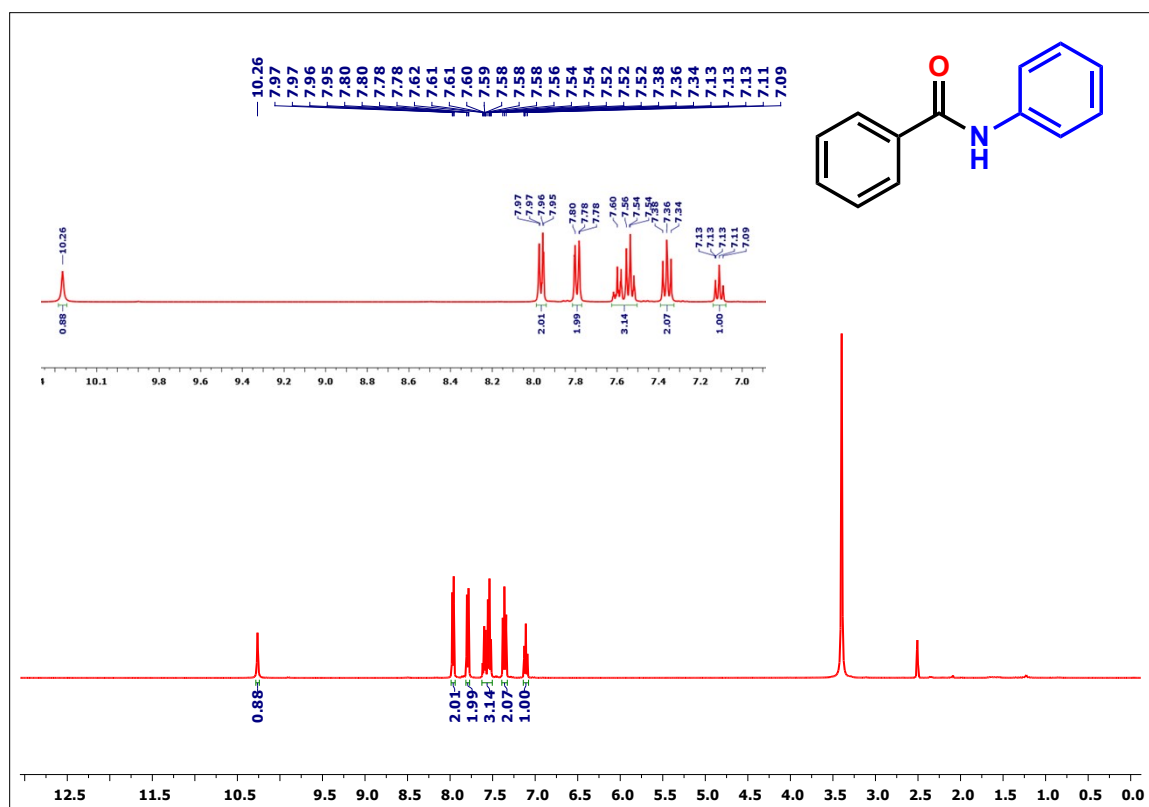

Figure S21: 400 MHz <sup>1</sup>H NMR spectrum of 3 in DMSO-d<sub>6</sub>

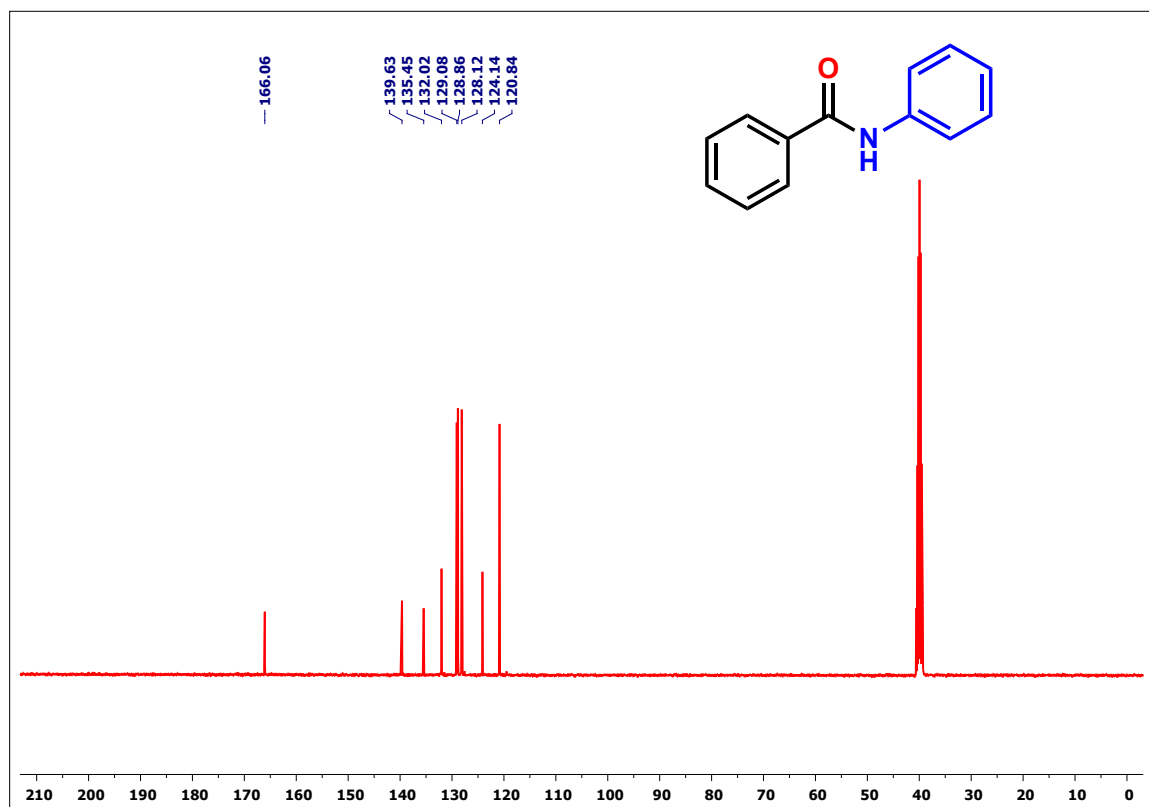

Figure S22: 100 MHz <sup>13</sup>C NMR spectrum of 3 in DMSO-d<sub>6</sub>

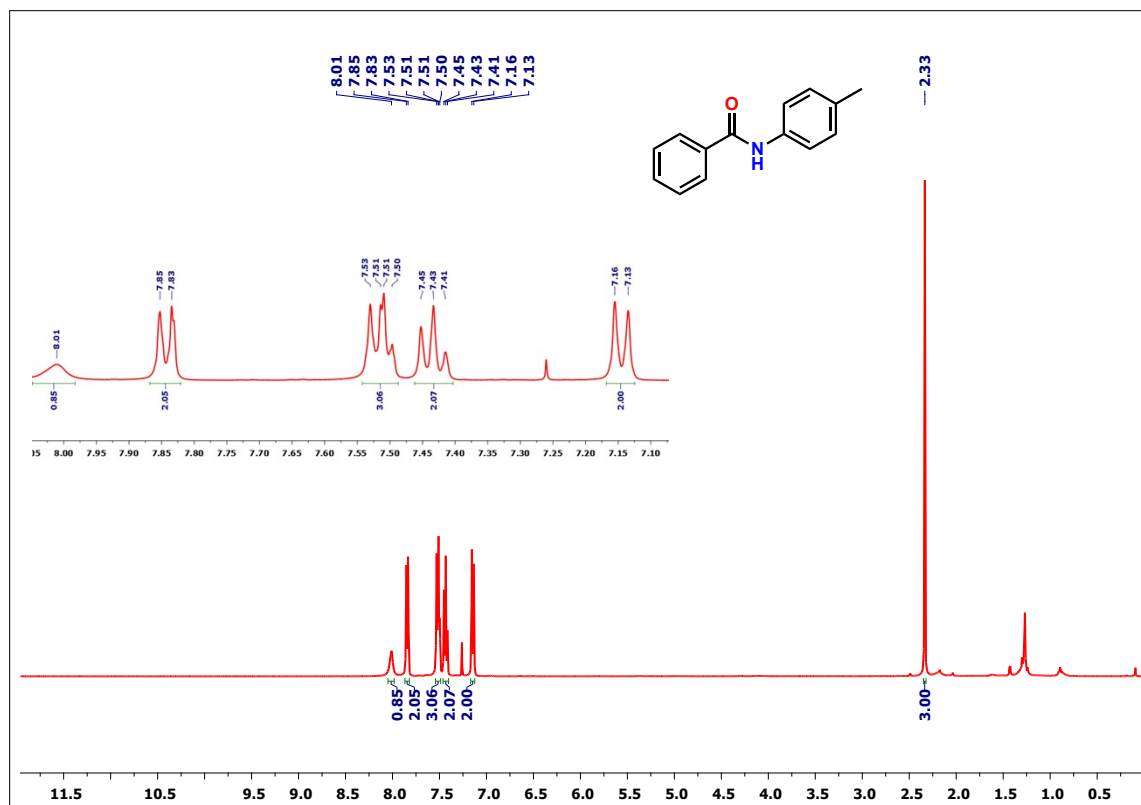

Figure S23: 400 MHz  $^1\text{H}$  NMR spectrum of **4** in  $\text{DMSO-d}_6$

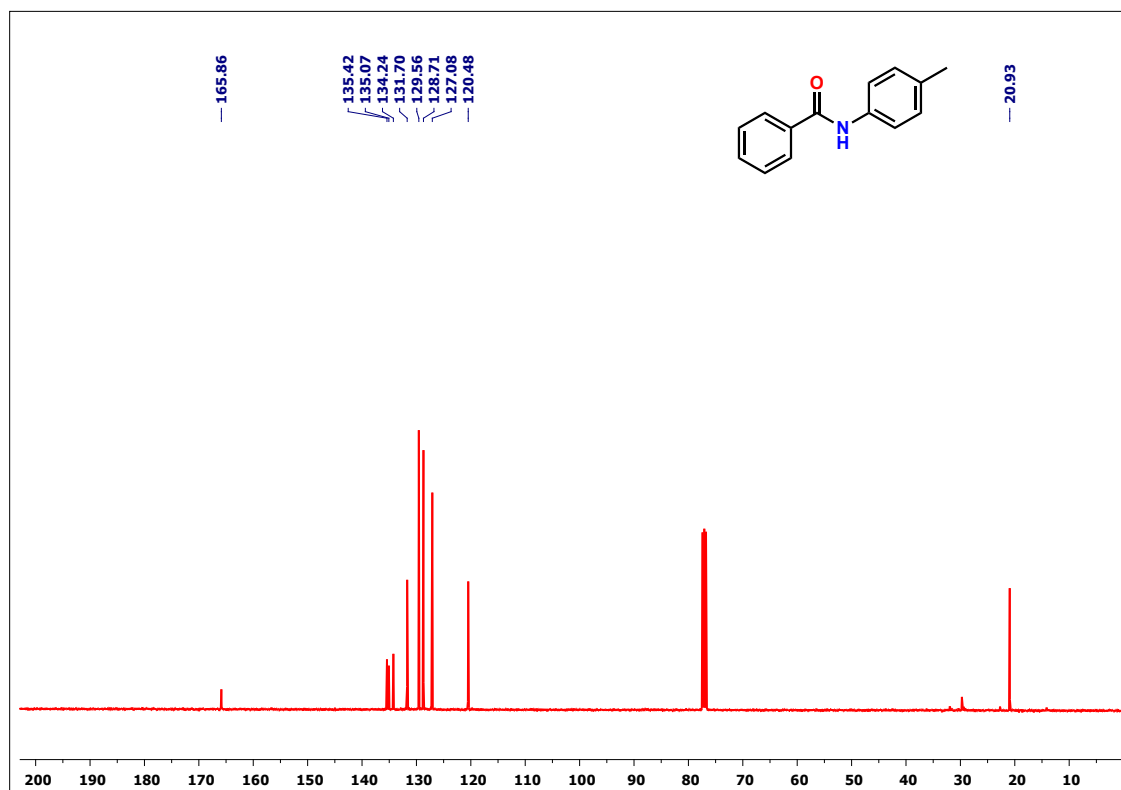

Figure S24: 100 MHz  $^{13}\text{C}$  NMR spectrum of **4** in  $\text{DMSO-d}_6$



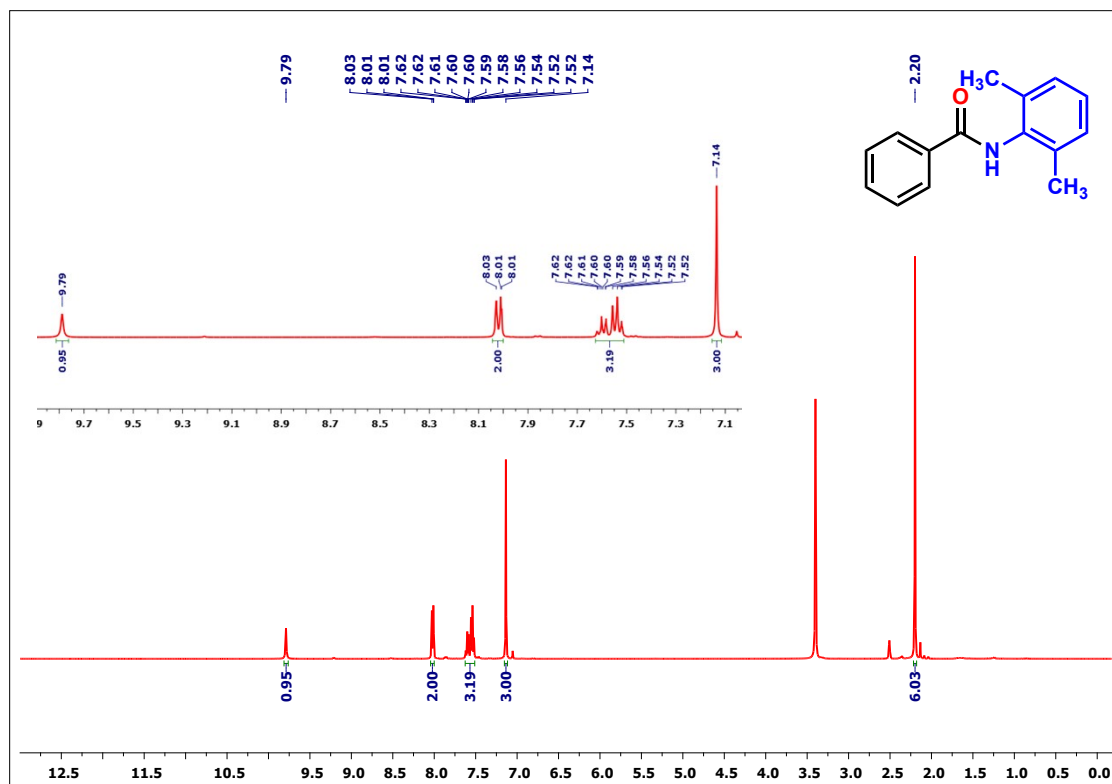

Figure S25: 400 MHz <sup>1</sup>H NMR spectrum of **5** in DMSO-d<sub>6</sub>

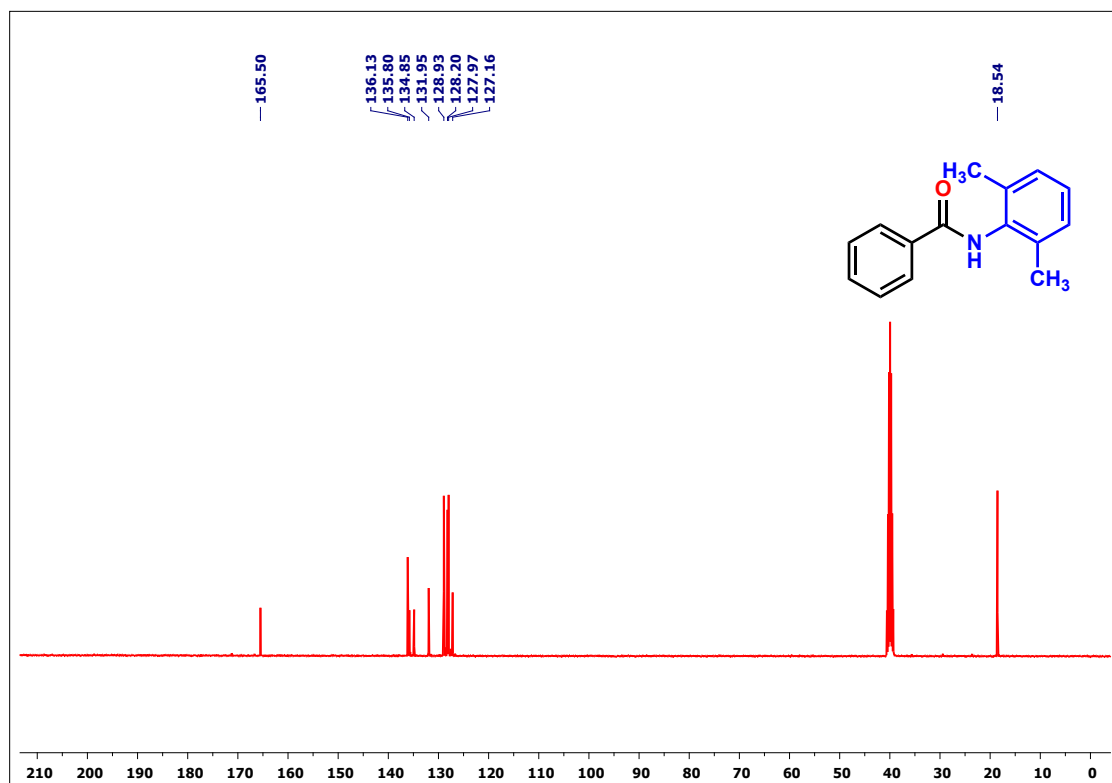

Figure S26: 100 MHz <sup>13</sup>C NMR spectrum of **5** in DMSO-d<sub>6</sub>

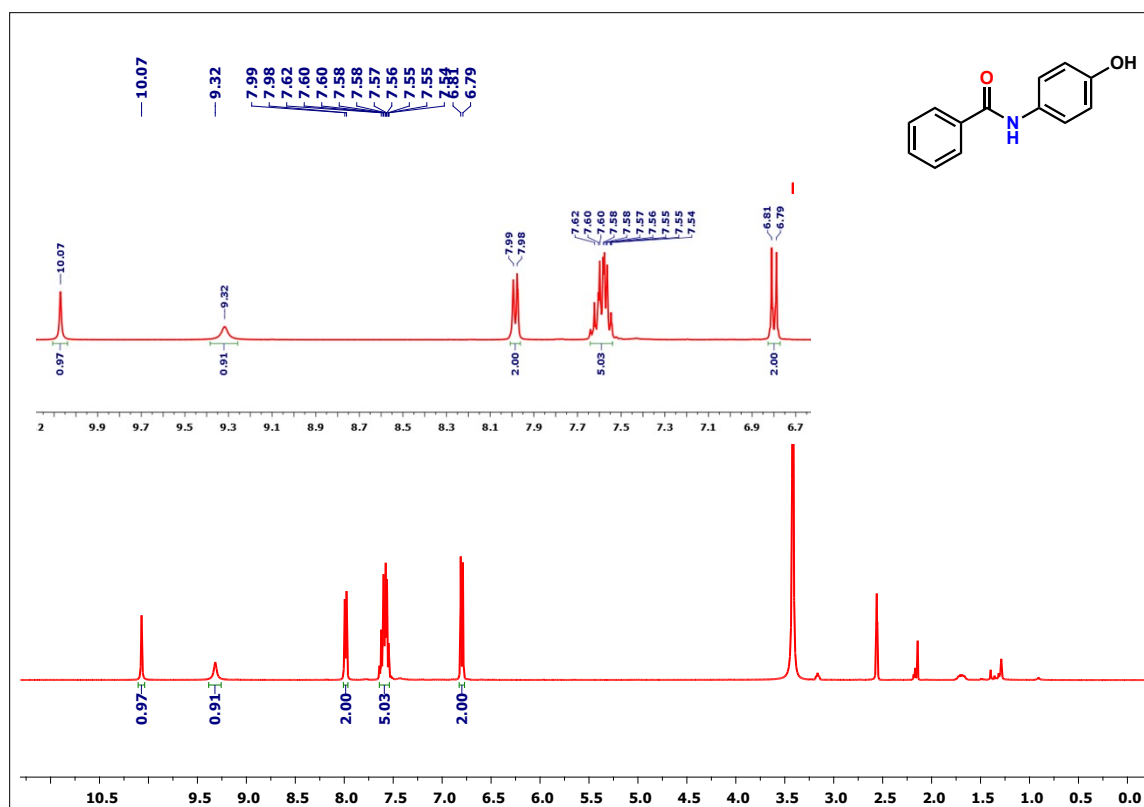

Figure S27: 400 MHz <sup>1</sup>H NMR spectrum of **6** in DMSO-d<sub>6</sub>

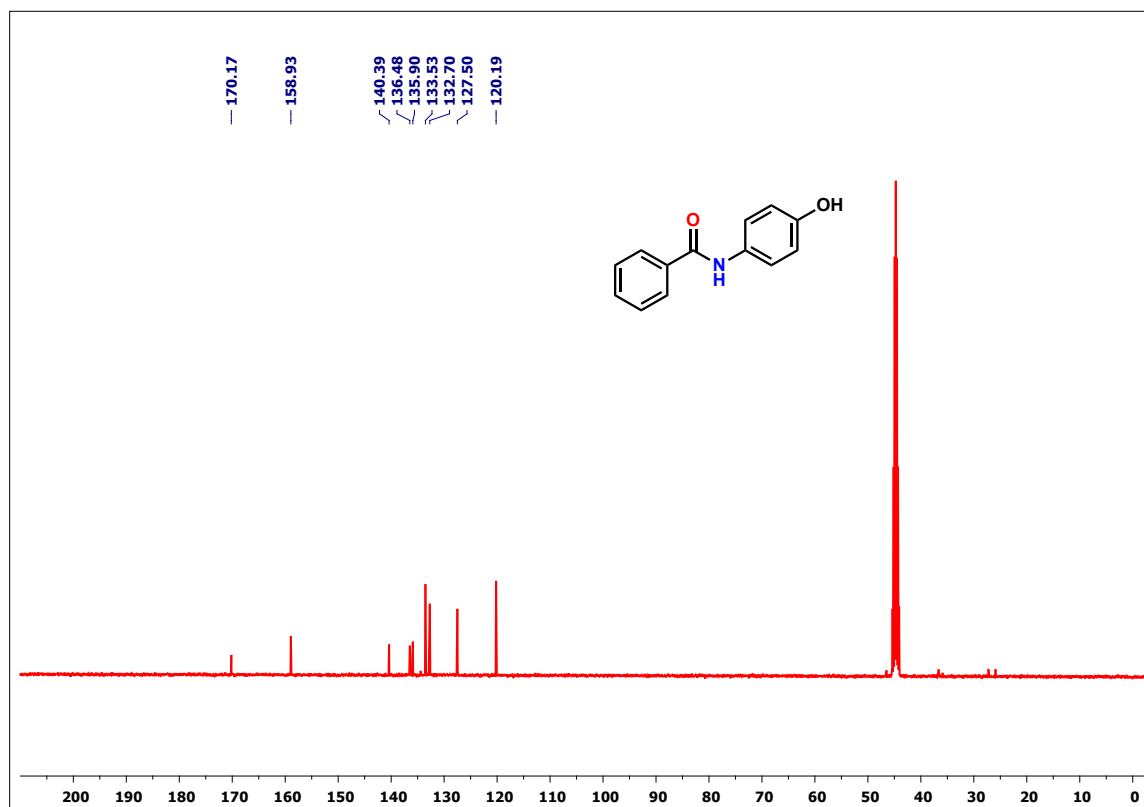

Figure S28: 100 MHz <sup>13</sup>C NMR spectrum of **6** in DMSO-d<sub>6</sub>

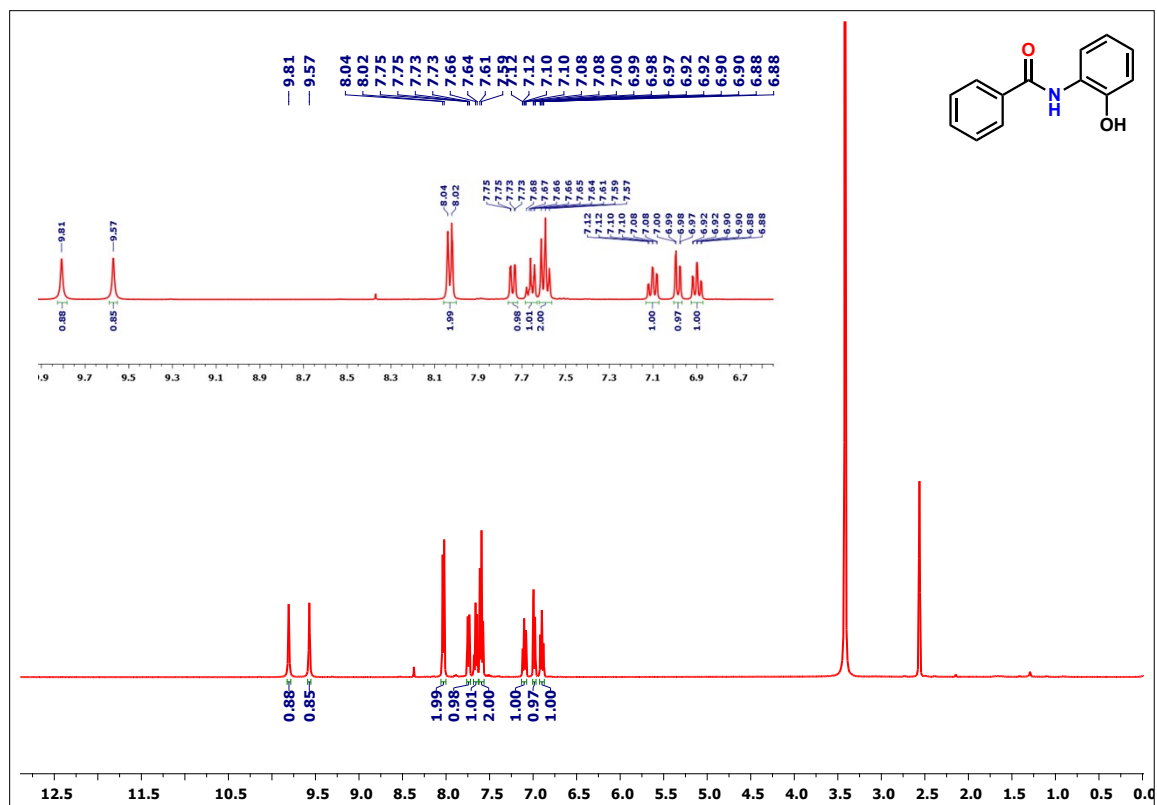

Figure S29: 400 MHz  $^1\text{H}$  NMR spectrum of 7 in  $\text{DMSO-d}_6$

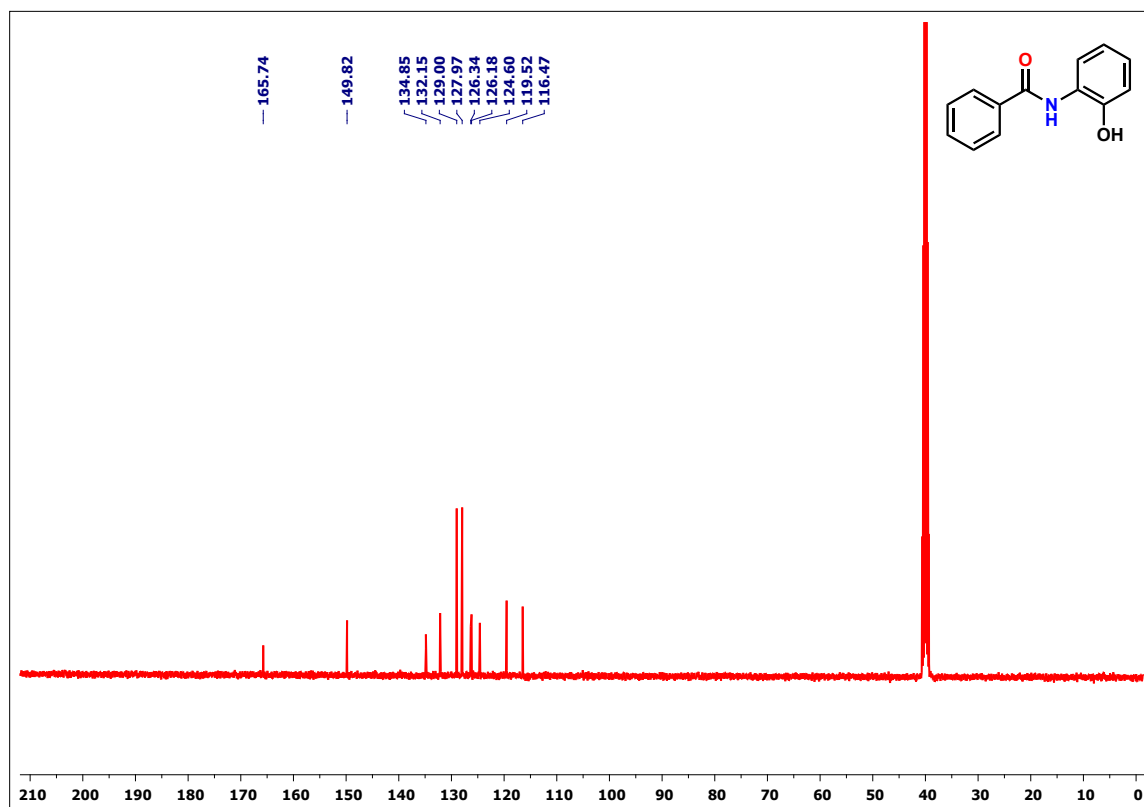

Figure S30: 100 MHz  $^{13}\text{C}$  NMR spectrum of 7 in  $\text{DMSO-d}_6$

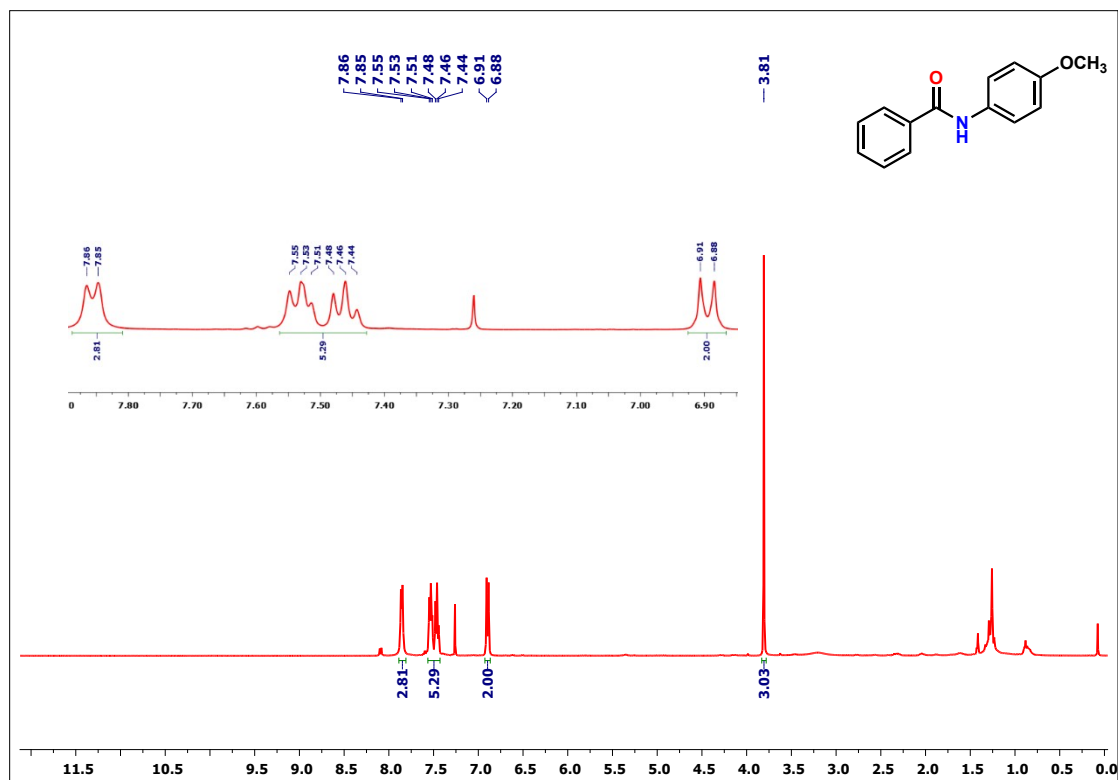

Figure S31: 400 MHz <sup>1</sup>H NMR spectrum of 8 in DMSO-d<sub>6</sub>

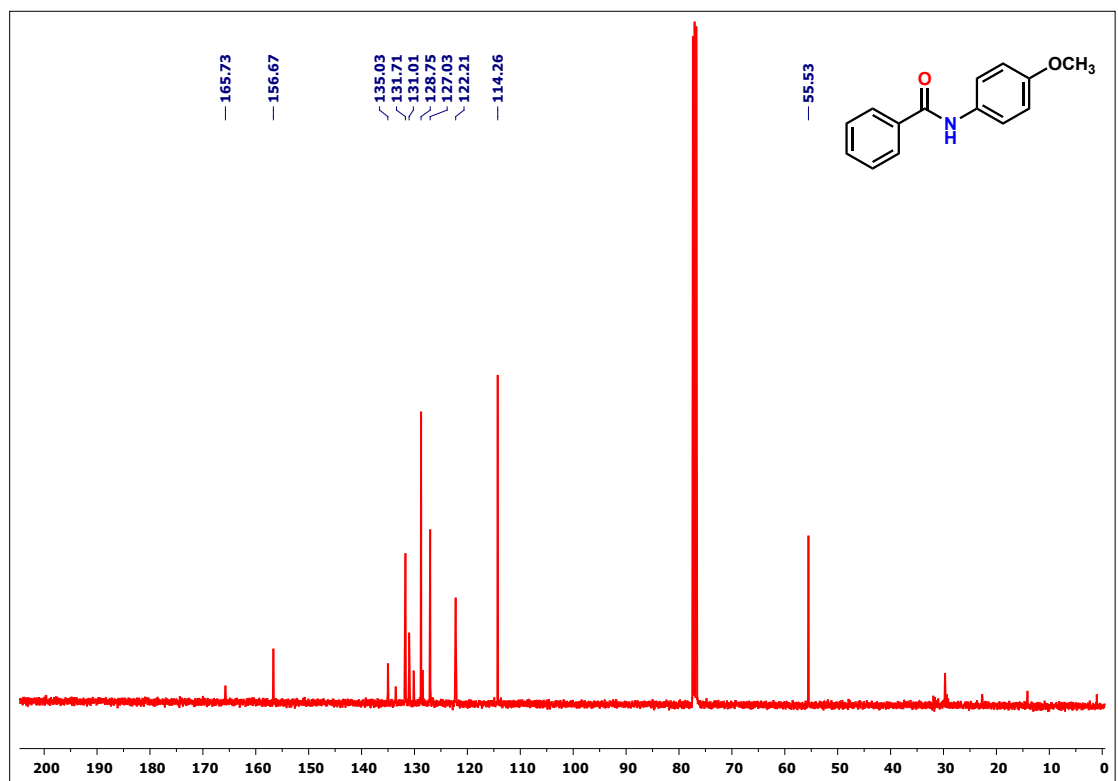

Figure S32: 100 MHz <sup>13</sup>C NMR spectrum of 8 in DMSO-d<sub>6</sub>

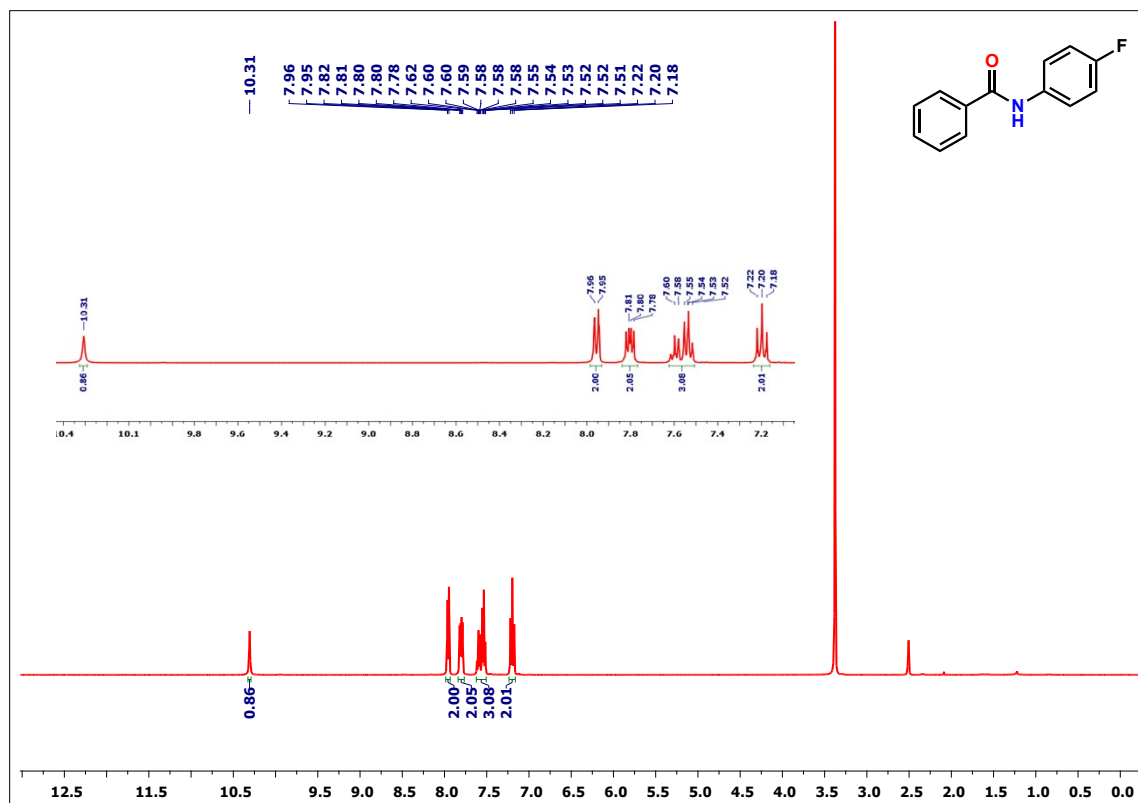

Figure S33: 400 MHz <sup>1</sup>H NMR spectrum of 9 in DMSO-d<sub>6</sub>

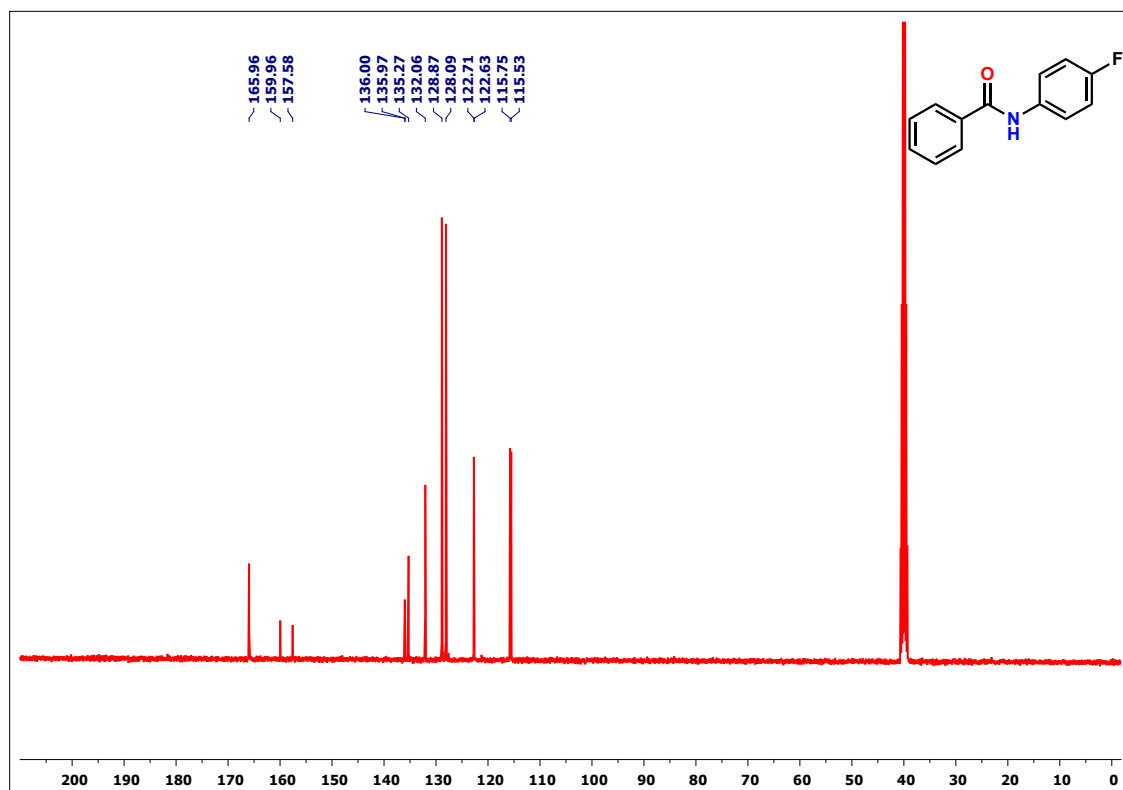

Figure S34: 100 MHz <sup>13</sup>C NMR spectrum of 9 in DMSO-d<sub>6</sub>



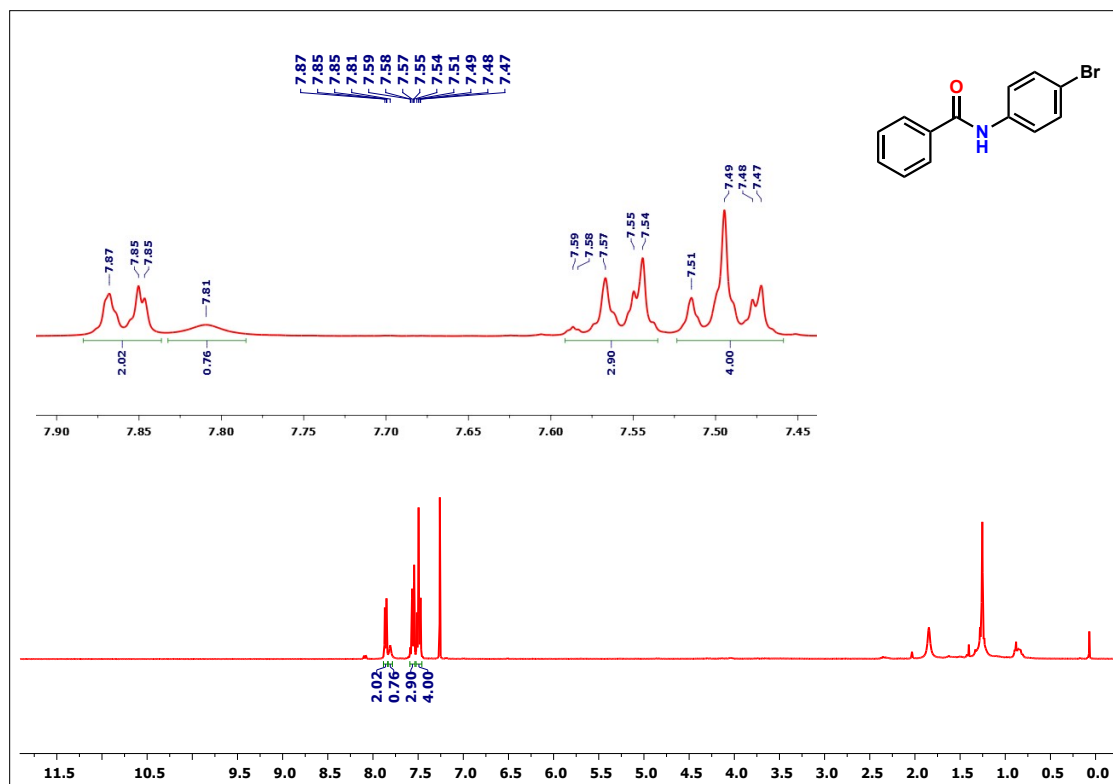

**Figure S37: 400 MHz  $^1\text{H}$  NMR spectrum of **11** in  $\text{DMSO-d}_6$**

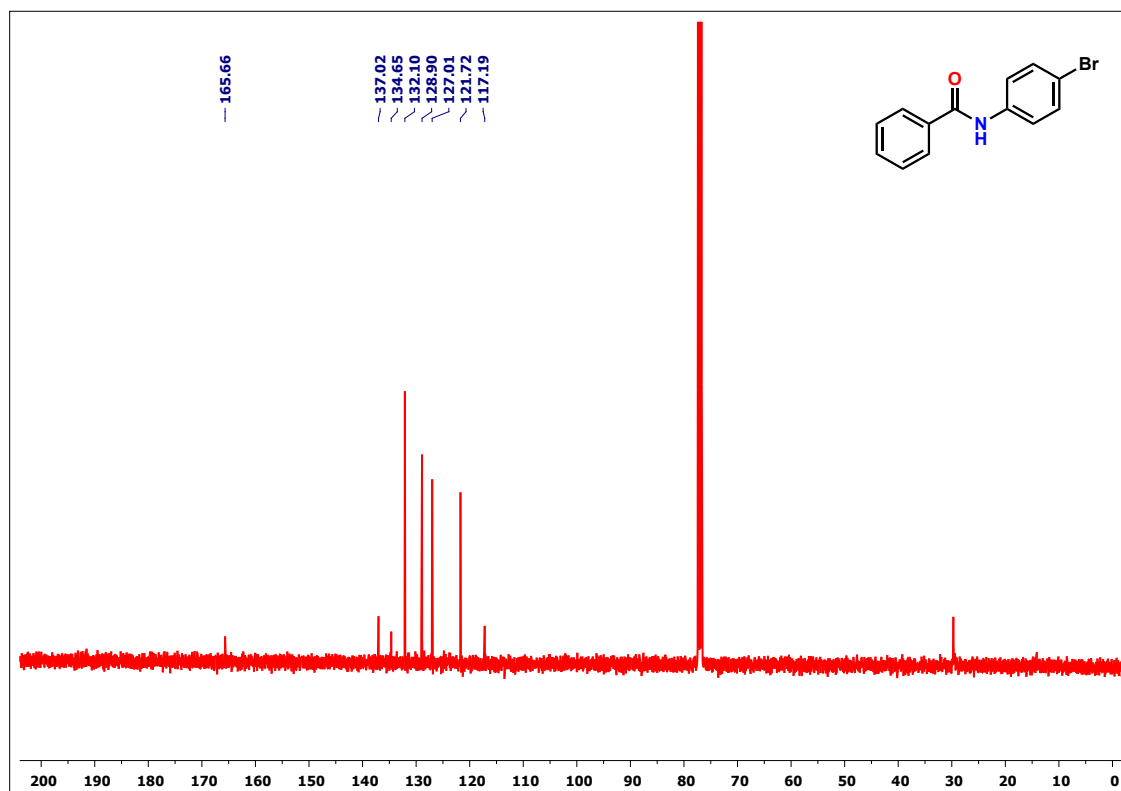

**Figure S38: 100 MHz  $^{13}\text{C}$  NMR spectrum of **11** in  $\text{DMSO-d}_6$**

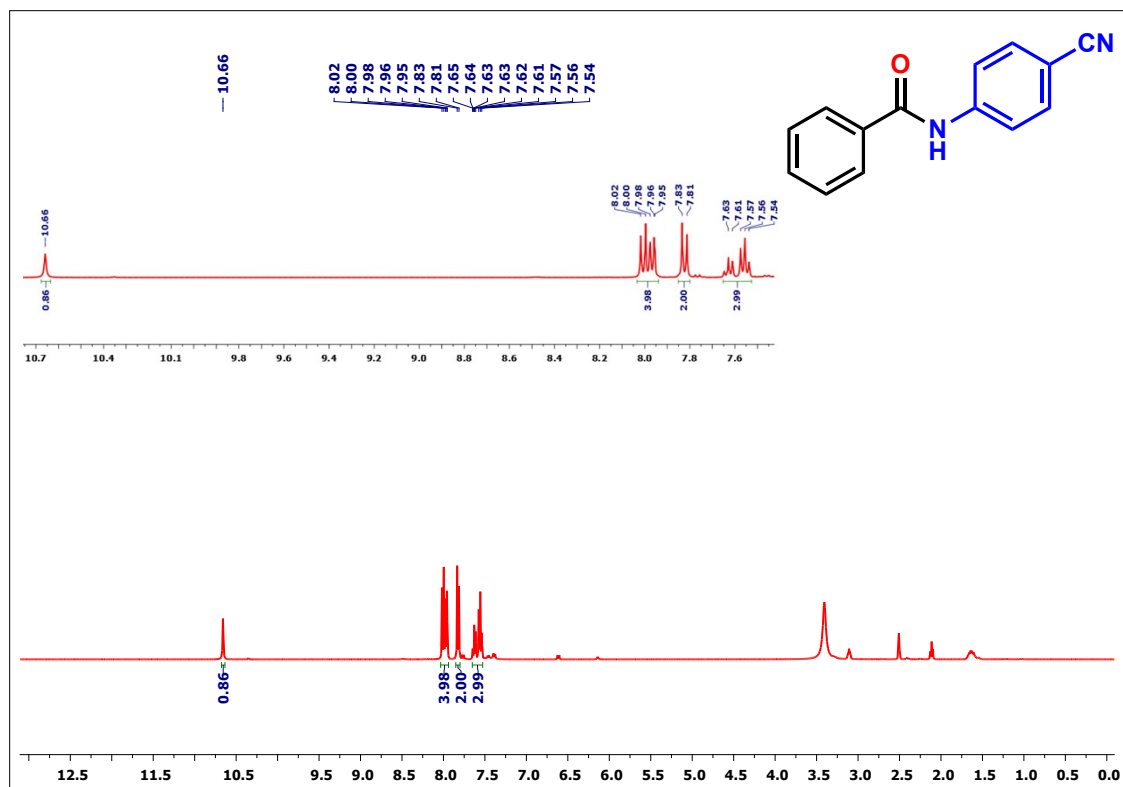

Figure S39: 400 MHz <sup>1</sup>H NMR spectrum of **12** in DMSO-d<sub>6</sub>

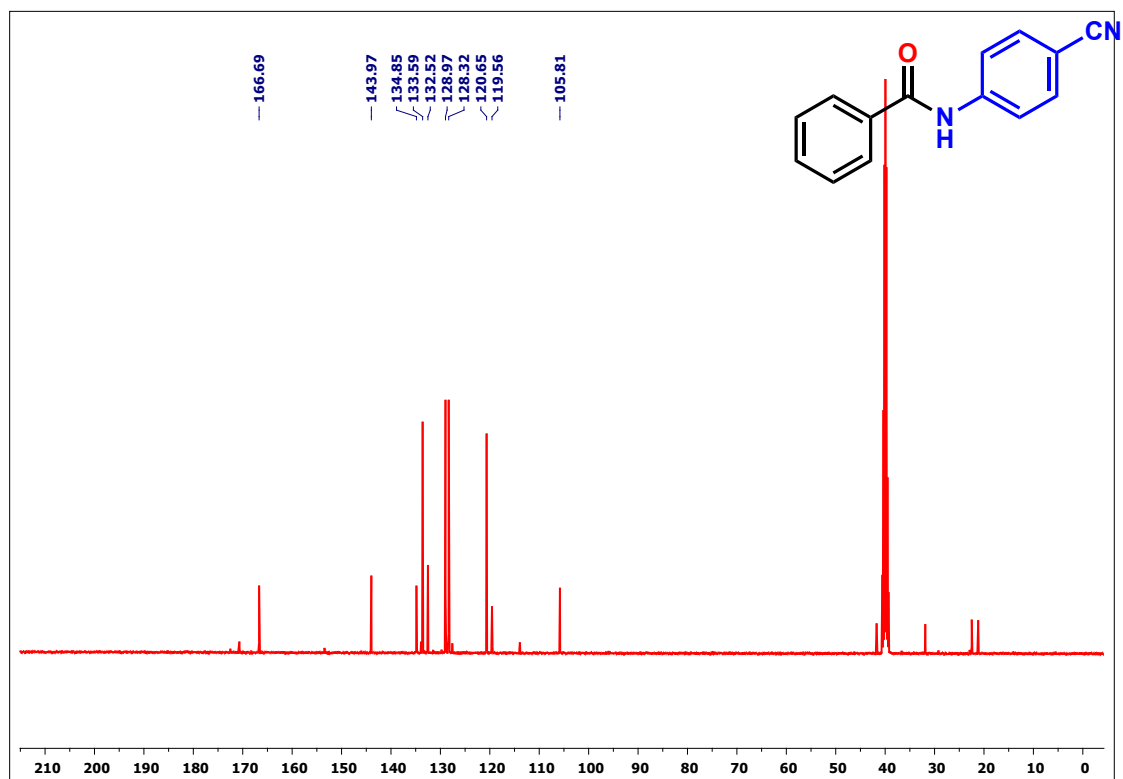

Figure S40: 100 MHz <sup>13</sup>C NMR spectrum of **12** in DMSO-d<sub>6</sub>





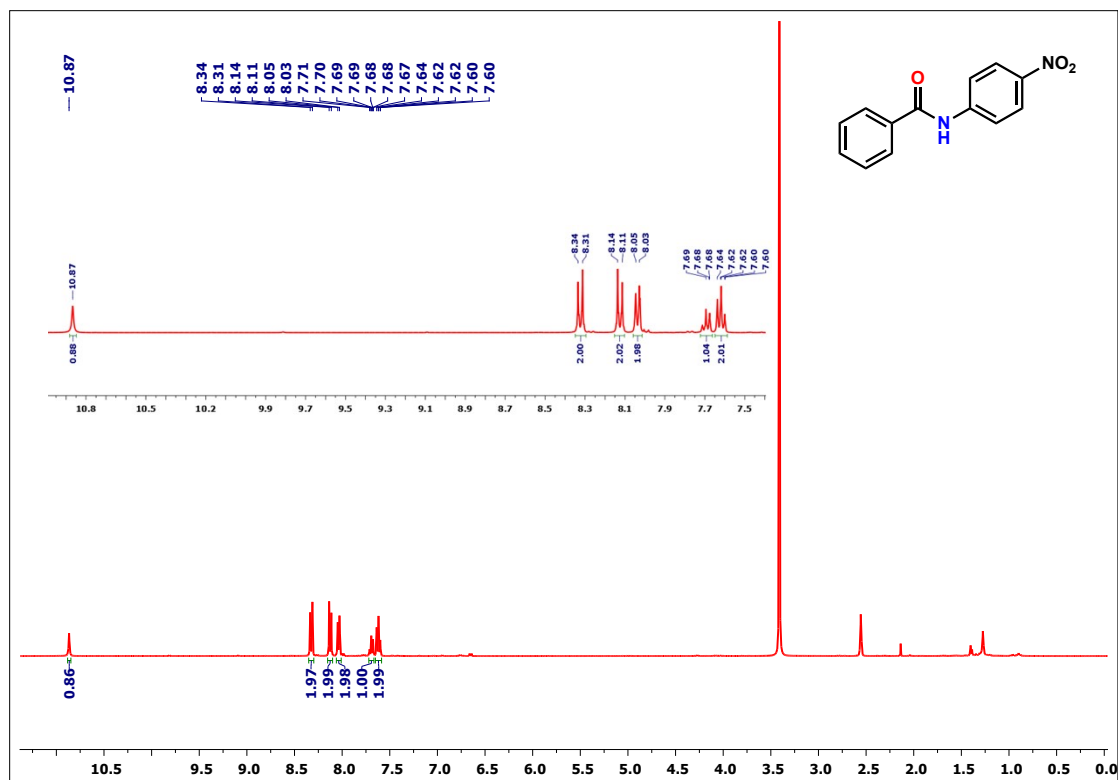

Figure S43: 400 MHz  $^1\text{H}$  NMR spectrum of **14** in  $\text{DMSO-d}_6$

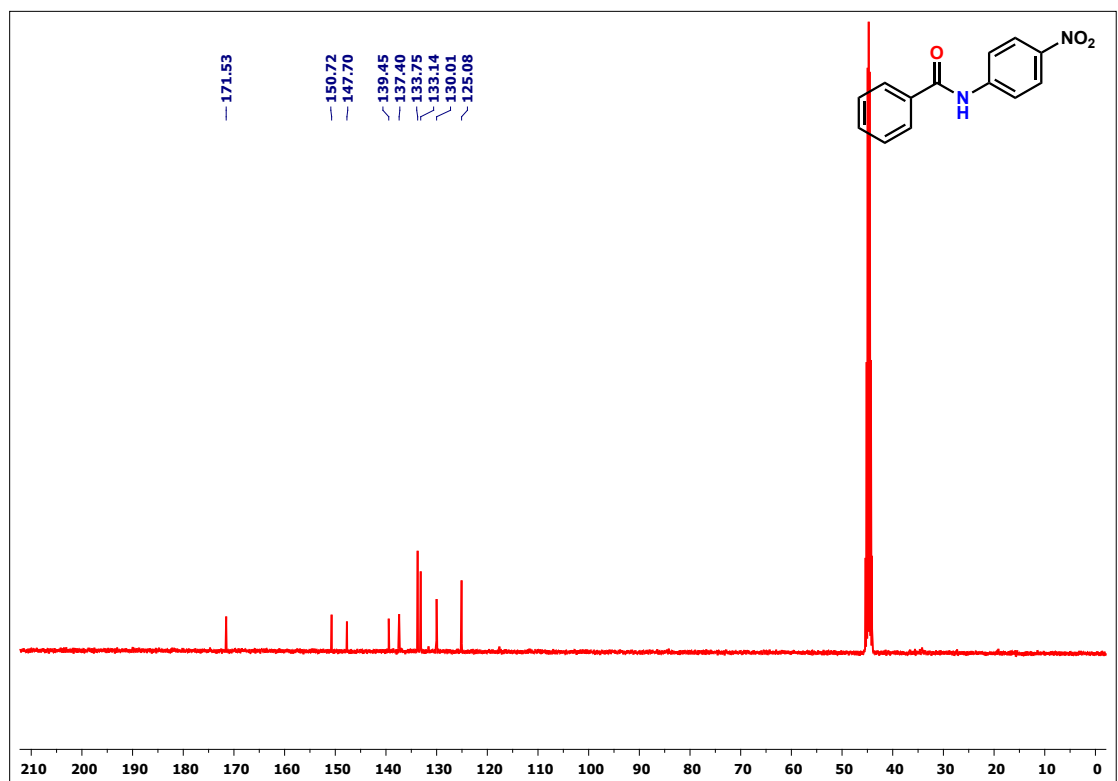

Figure S44: 100 MHz  $^{13}\text{C}$  NMR spectrum of **14** in  $\text{DMSO-d}_6$

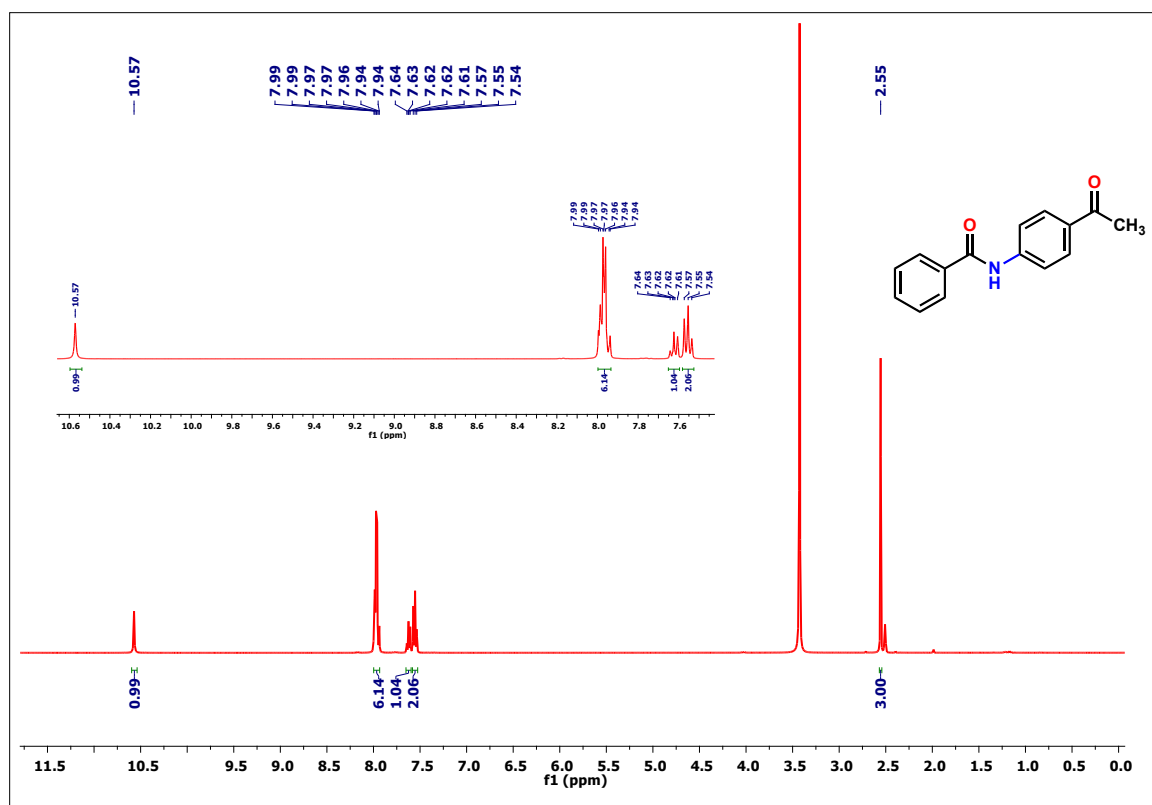

Figure S45: 400 MHz  $^1\text{H}$  NMR spectrum of **15** in  $\text{DMSO-d}_6$

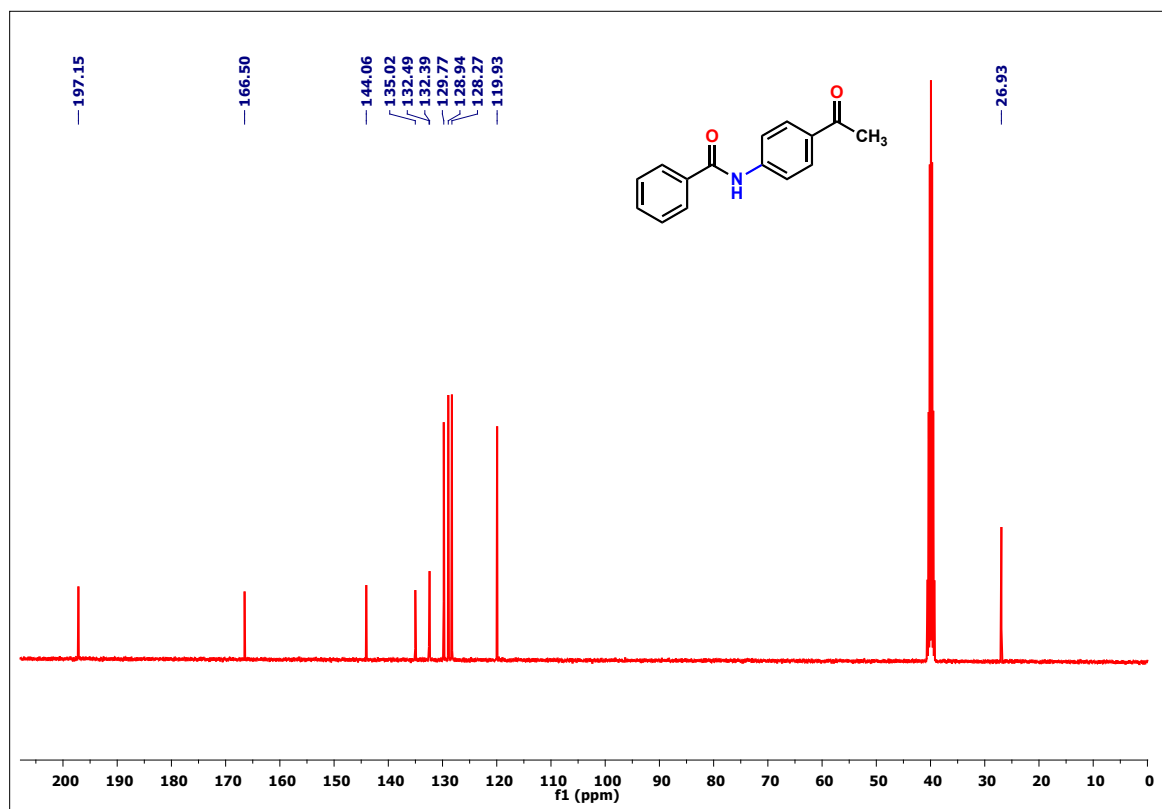

Figure S46: 100 MHz  $^{13}\text{C}$  NMR spectrum of **15** in  $\text{DMSO-d}_6$

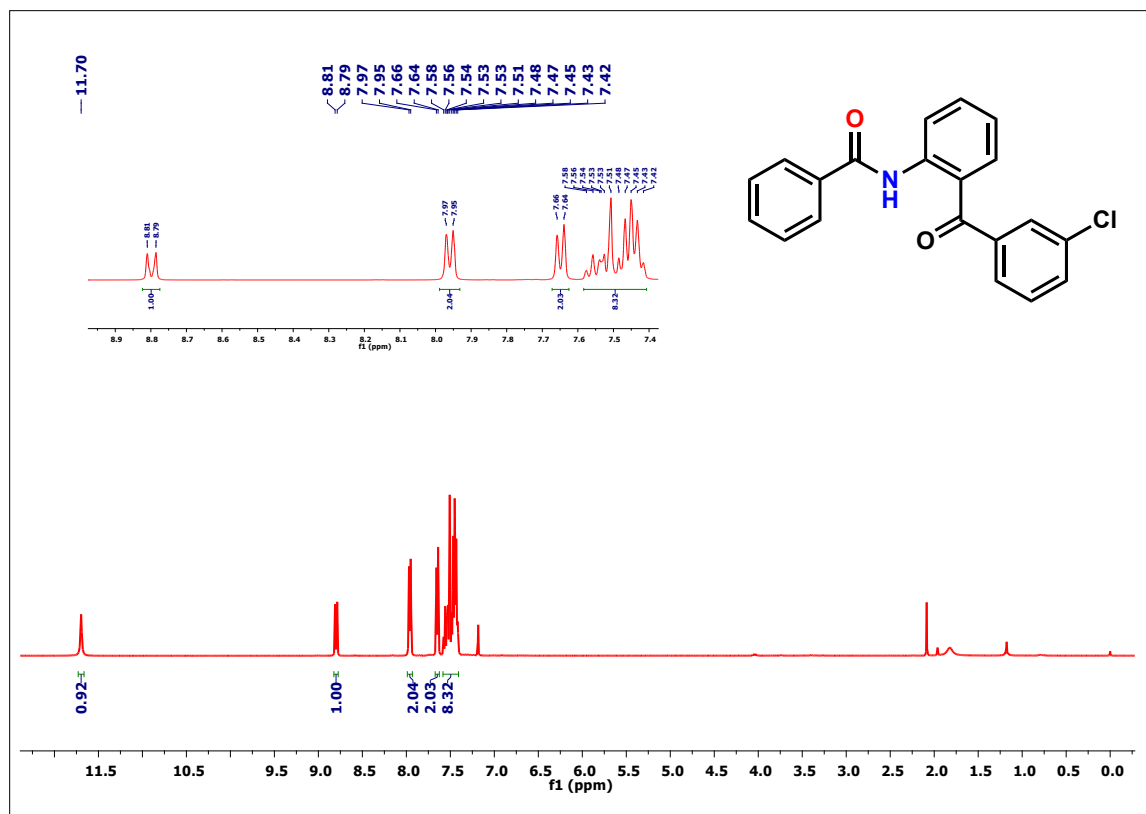

Figure S47: 400 MHz <sup>1</sup>H NMR spectrum of 16 in CDCl<sub>3</sub>

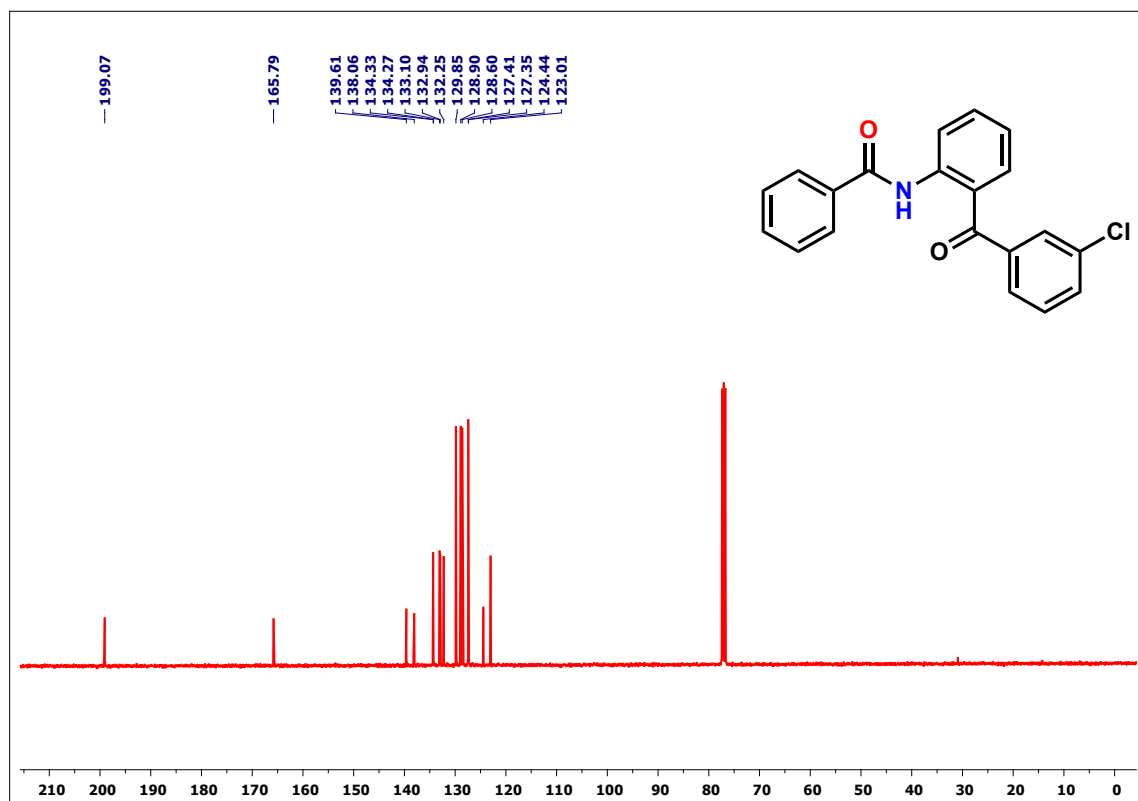

Figure S48: 100 MHz <sup>13</sup>C NMR spectrum of 16 in CDCl<sub>3</sub>

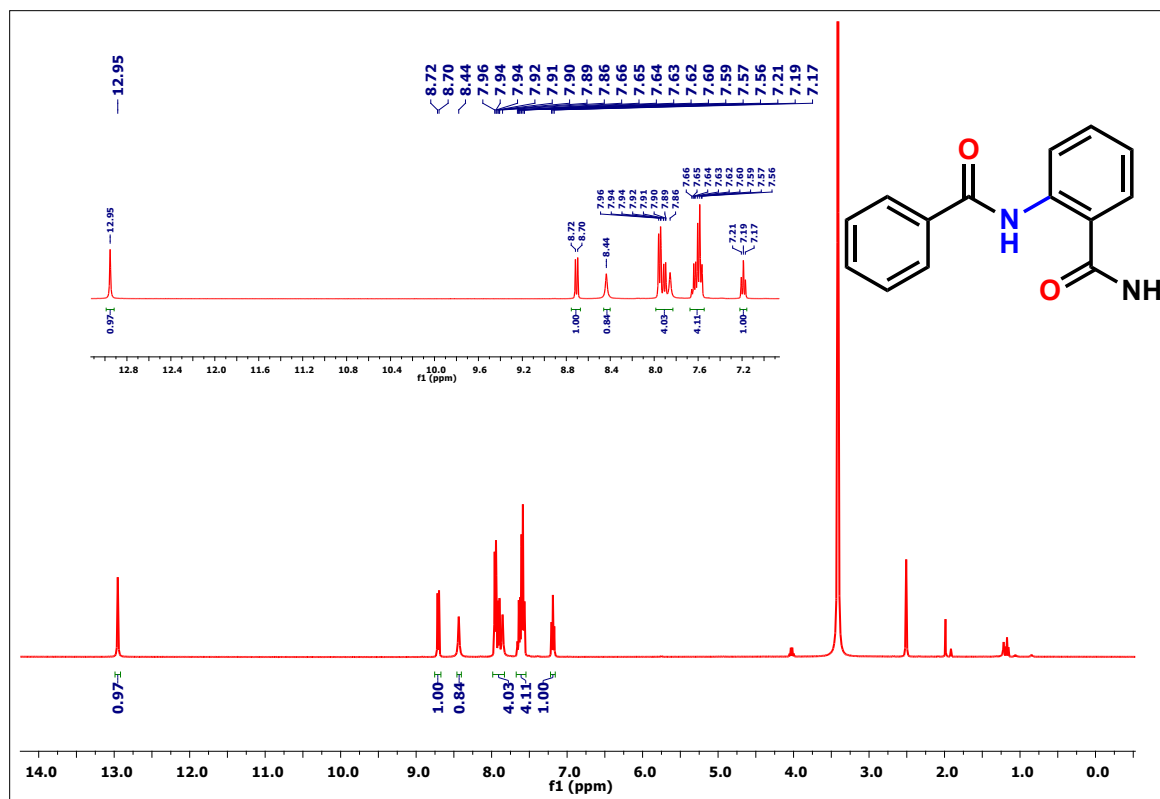

Figure S49: 400 MHz  $^1\text{H}$  NMR spectrum of 17 in  $\text{DMSO-d}_6$

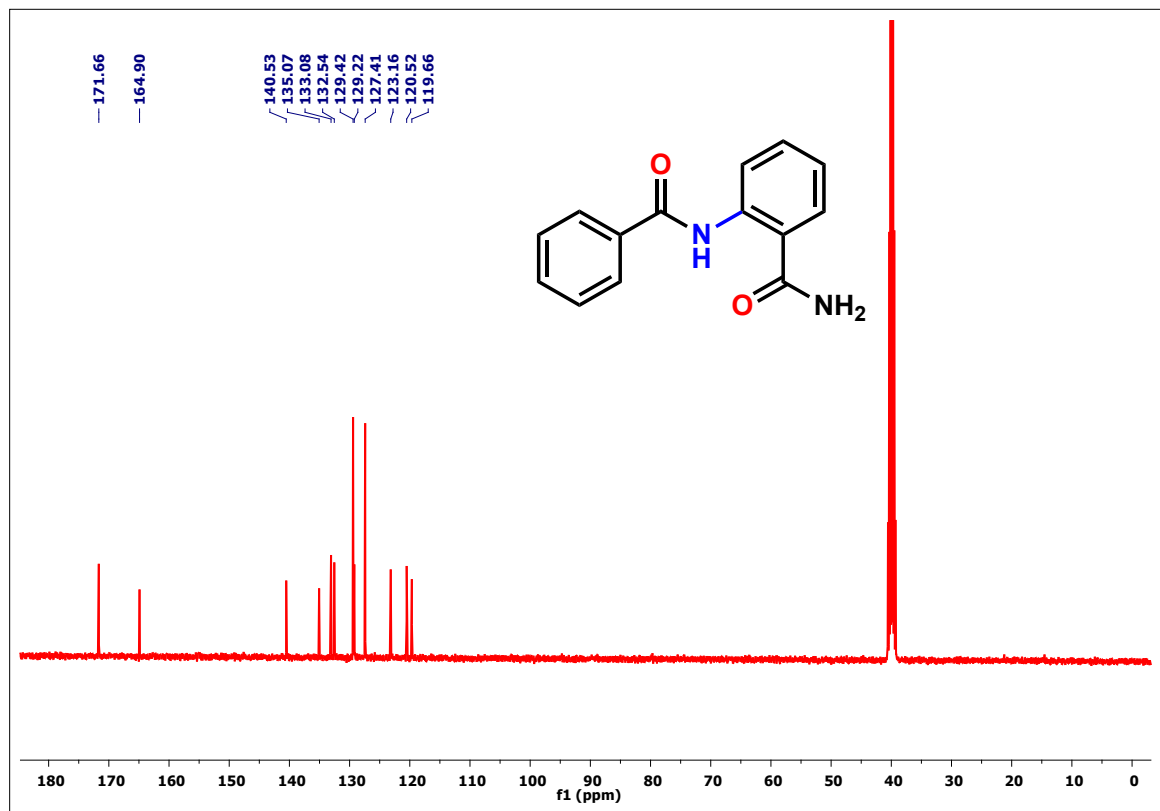

Figure S50: 100 MHz  $^{13}\text{C}$  NMR spectrum of 17 in  $\text{DMSO-d}_6$

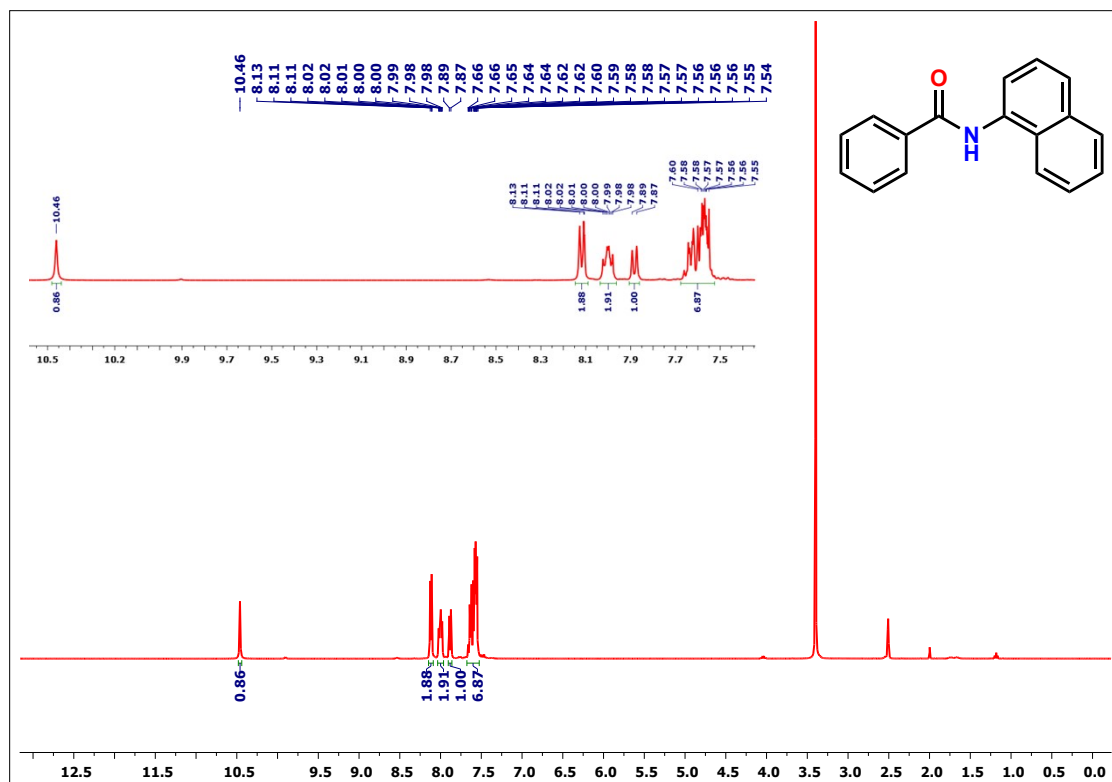

Figure S51: 400 MHz <sup>1</sup>H NMR spectrum of **18** in DMSO-d<sub>6</sub>

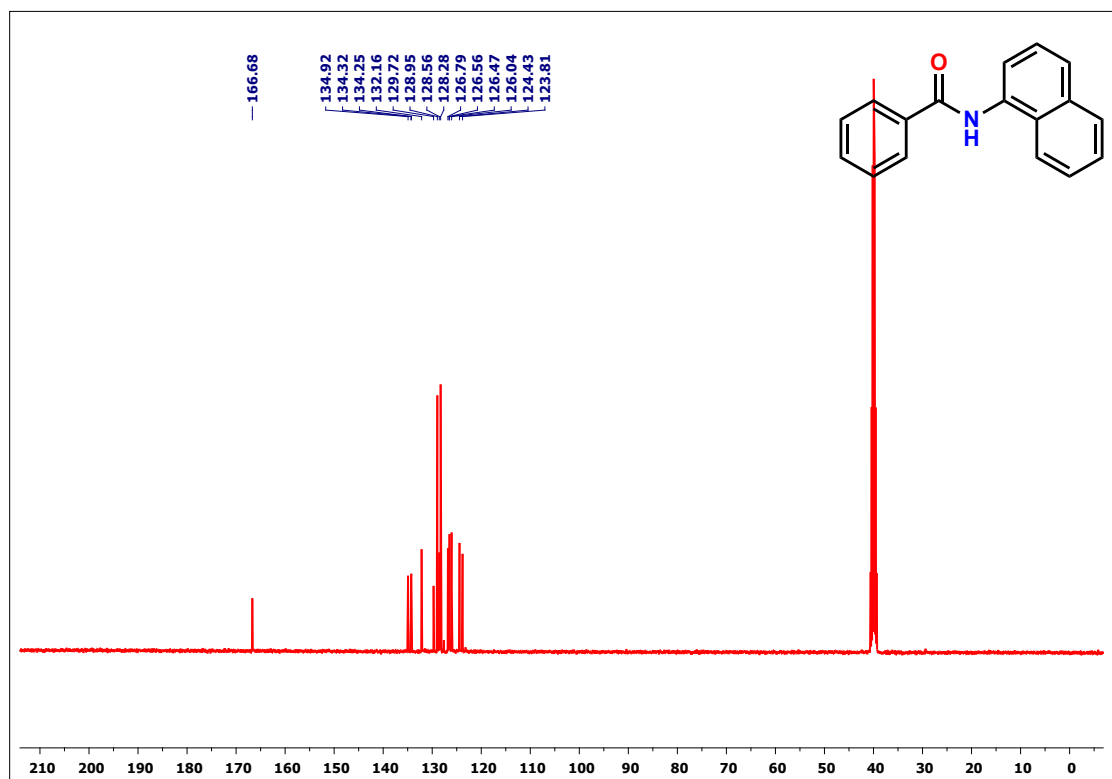

Figure S52: 100 MHz <sup>13</sup>C NMR spectrum of **18** in DMSO-d<sub>6</sub>

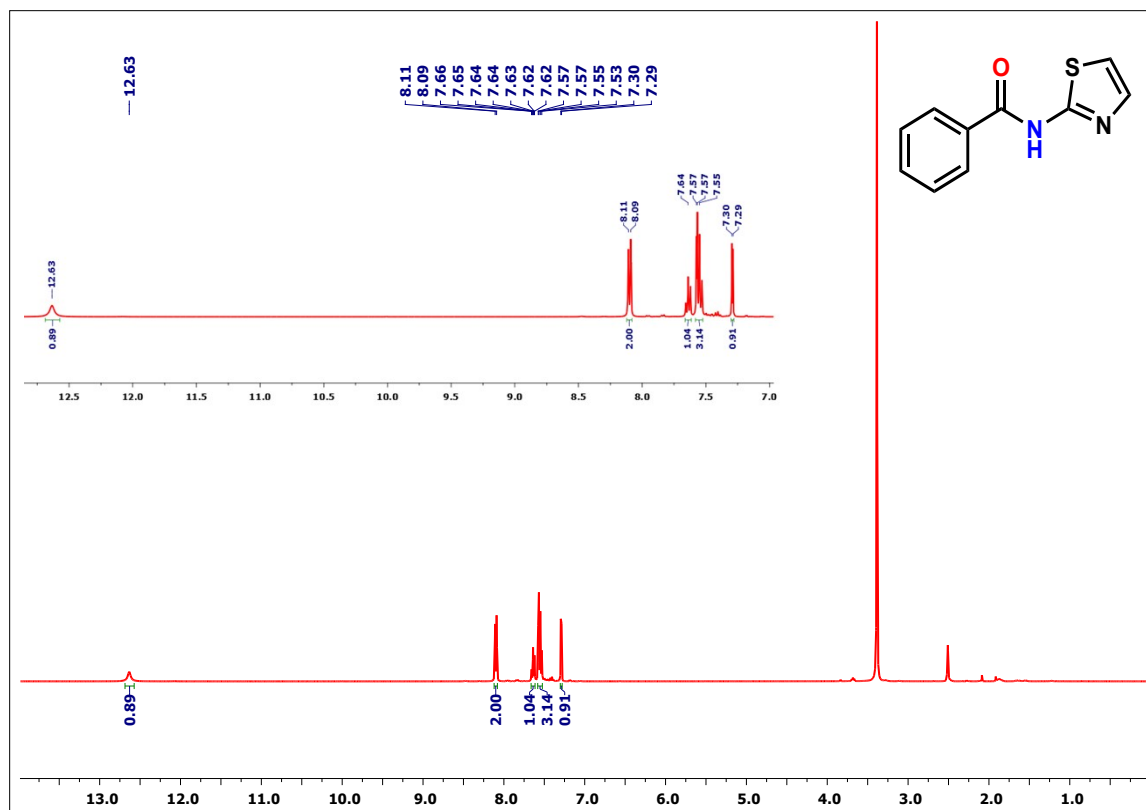

Figure S53: 400 MHz  $^1\text{H}$  NMR spectrum of **19** in  $\text{DMSO-d}_6$

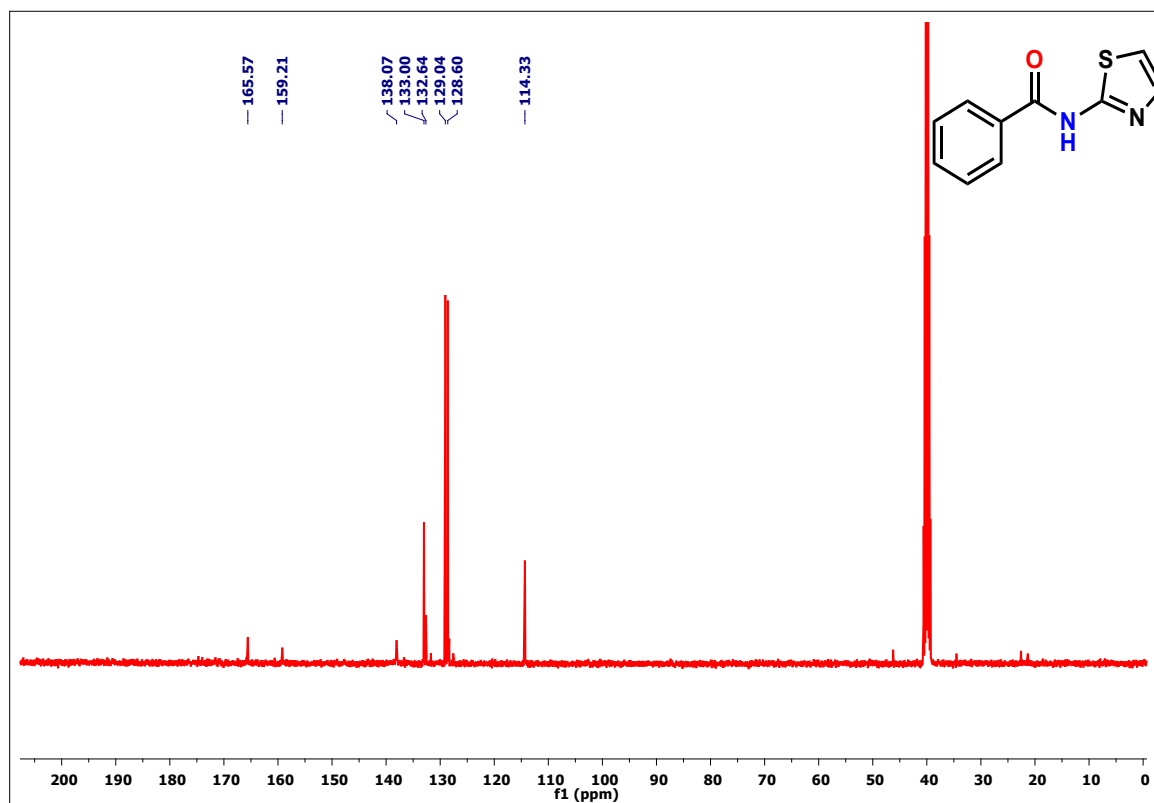

Figure S54: 100 MHz  $^{13}\text{C}$  NMR spectrum of **19** in  $\text{DMSO-d}_6$

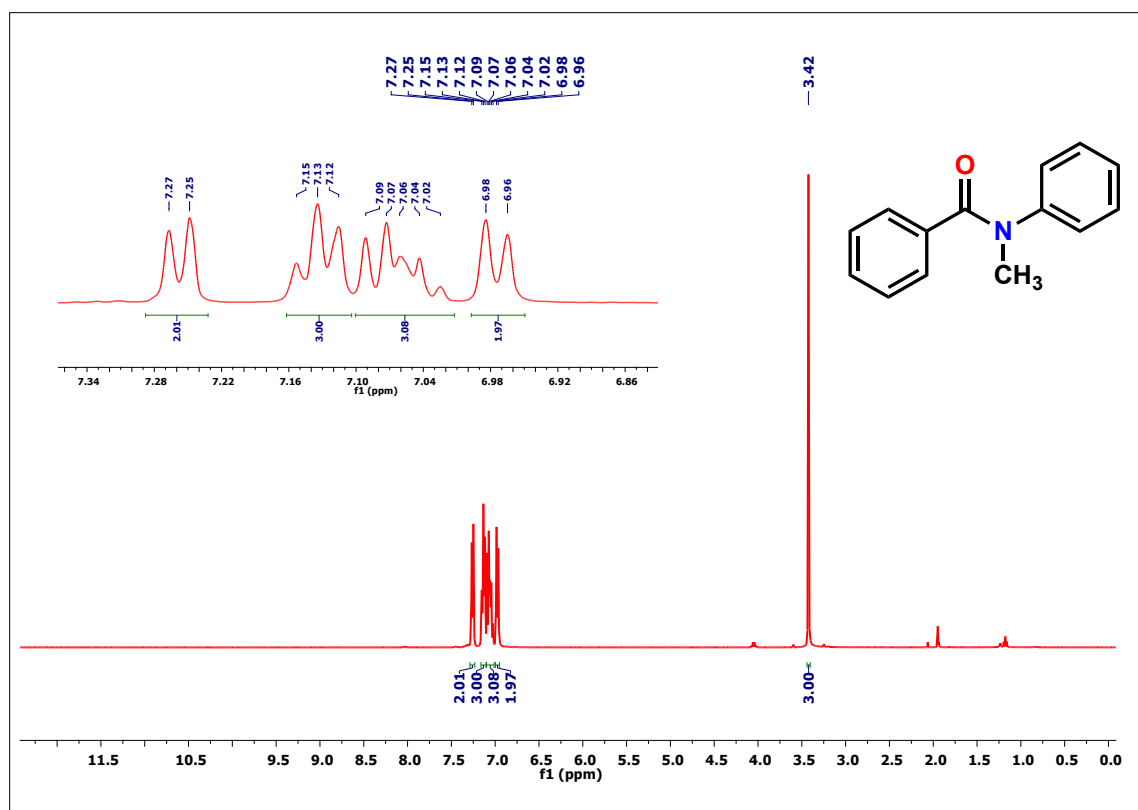

Figure S55: 400 MHz  $^1\text{H}$  NMR spectrum of **20** in  $\text{CDCl}_3$

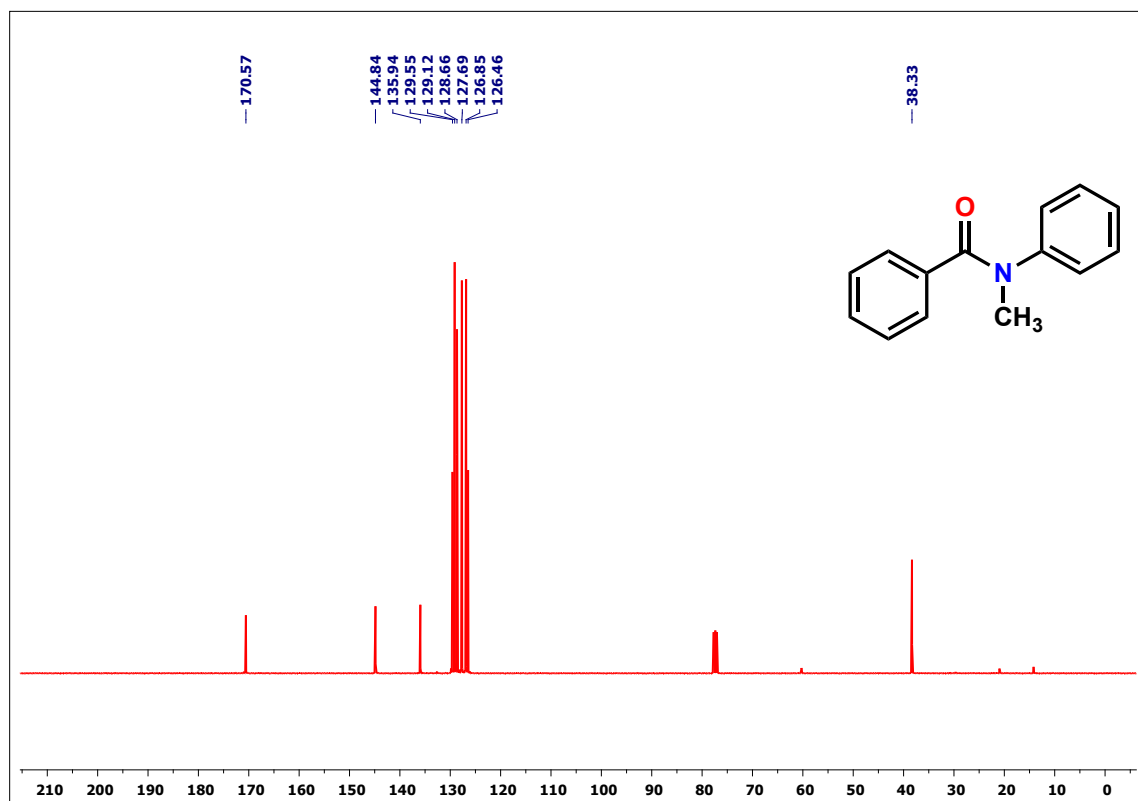

Figure S56: 100 MHz  $^{13}\text{C}$  NMR spectrum of **20** in  $\text{CDCl}_3$



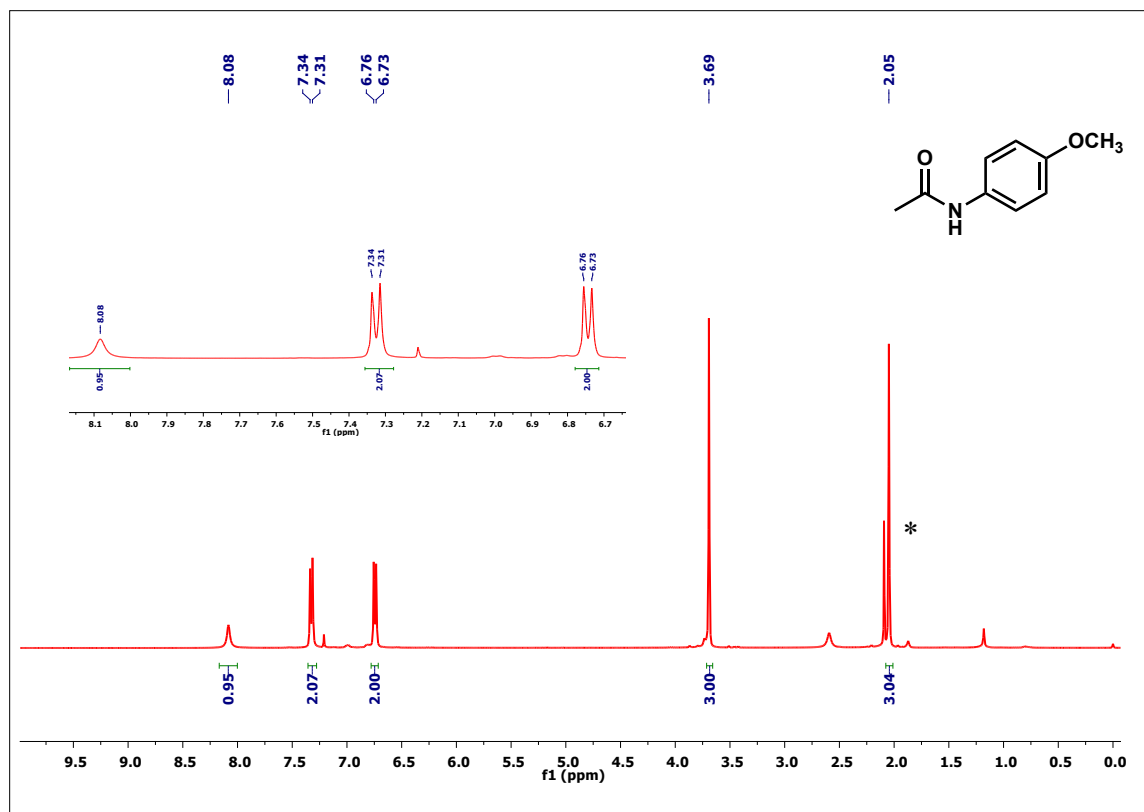

Figure S57: 400 MHz  $^1\text{H}$  NMR spectrum of **21** in  $\text{CDCl}_3$

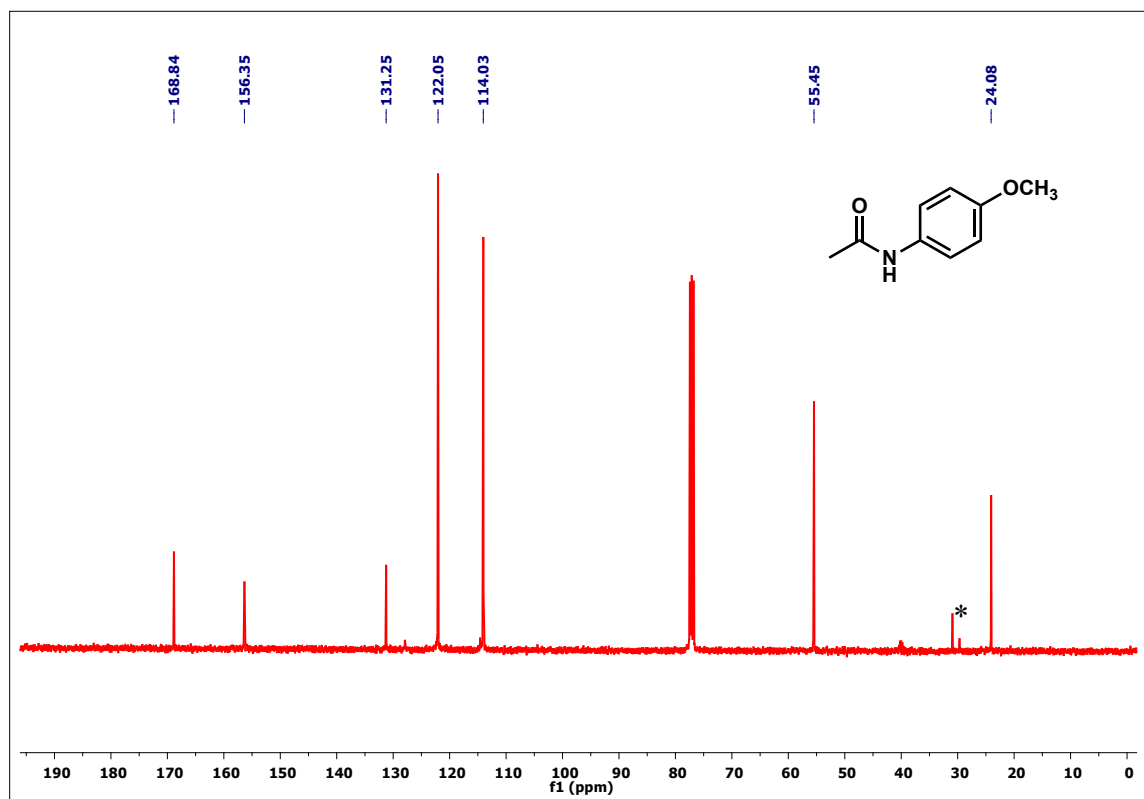

Figure S58: 100 MHz  $^{13}\text{C}$  NMR spectrum of **21** in  $\text{CDCl}_3$

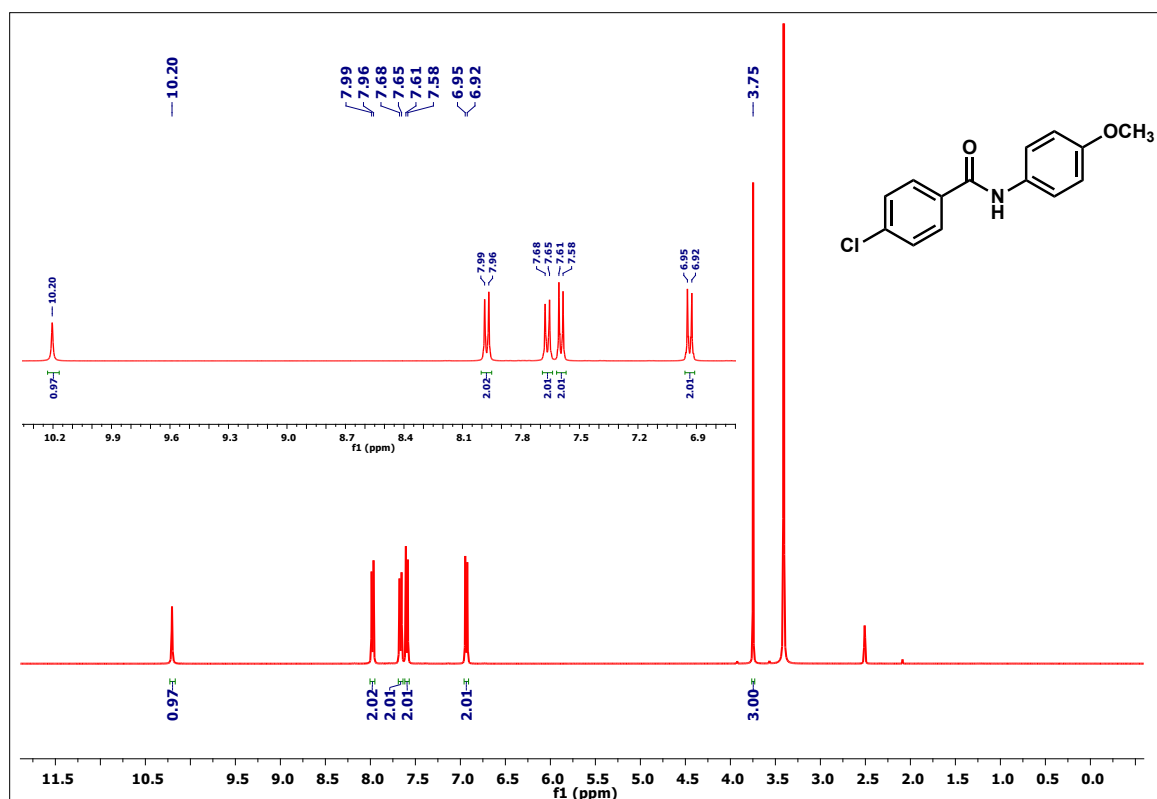

**Figure S59:** 400 MHz  $^1\text{H}$  NMR spectrum of **22** in  $\text{DMSO-d}_6$

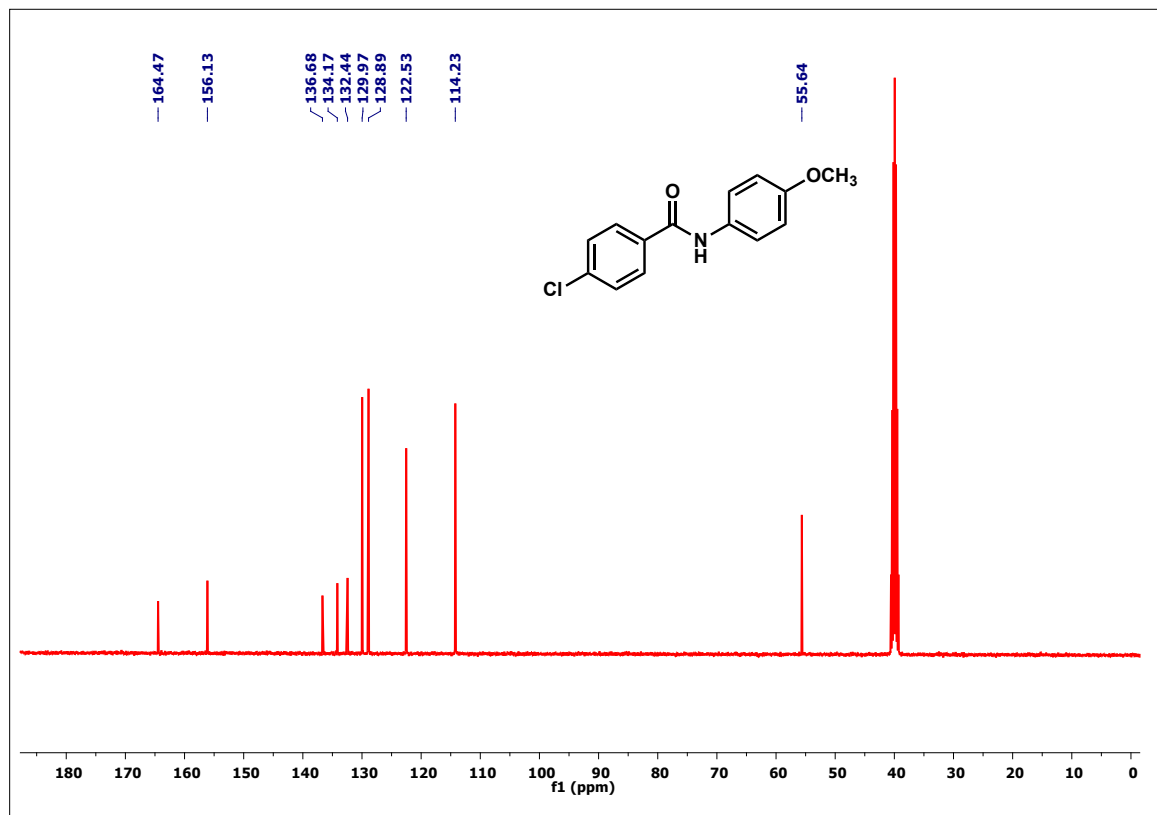

**Figure S60:** 100 MHz  $^{13}\text{C}$  NMR spectrum of **22** in  $\text{DMSO-d}_6$

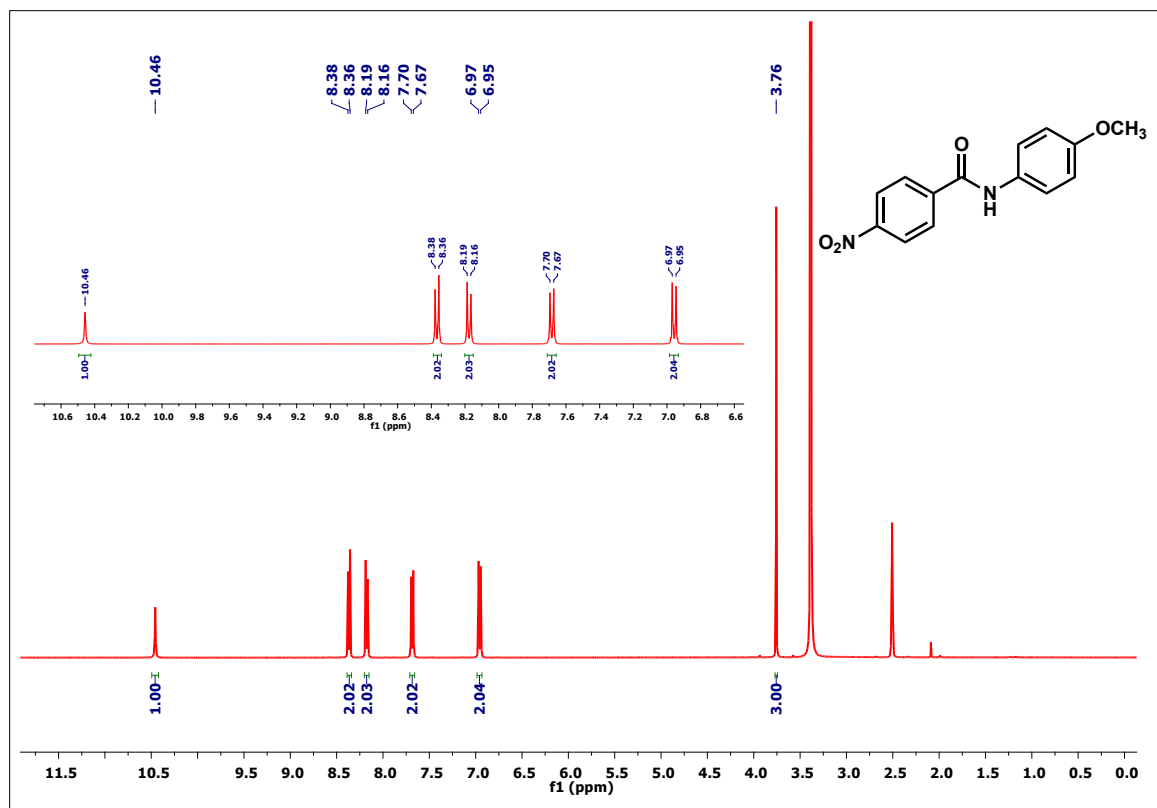

Figure S61: 400 MHz <sup>1</sup>H NMR spectrum of **23** in DMSO-d<sub>6</sub>

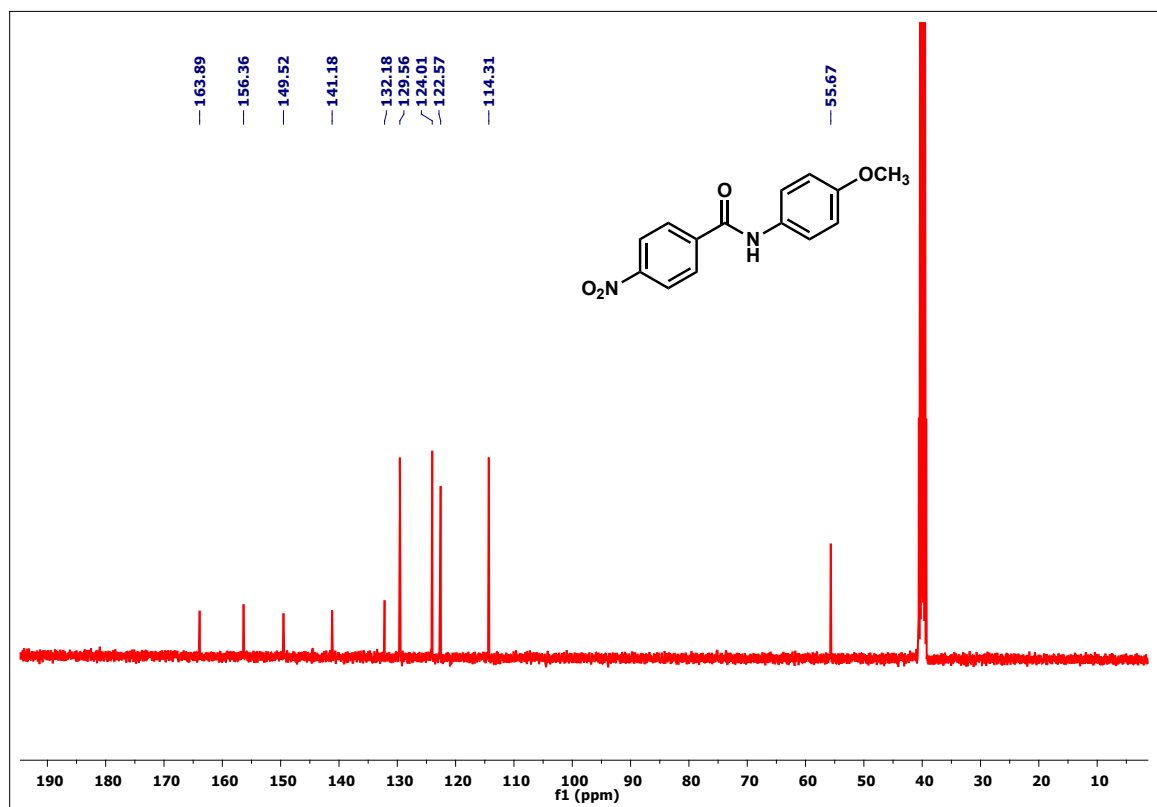

Figure S62: 100 MHz <sup>13</sup>C NMR spectrum of **23** in DMSO-d<sub>6</sub>

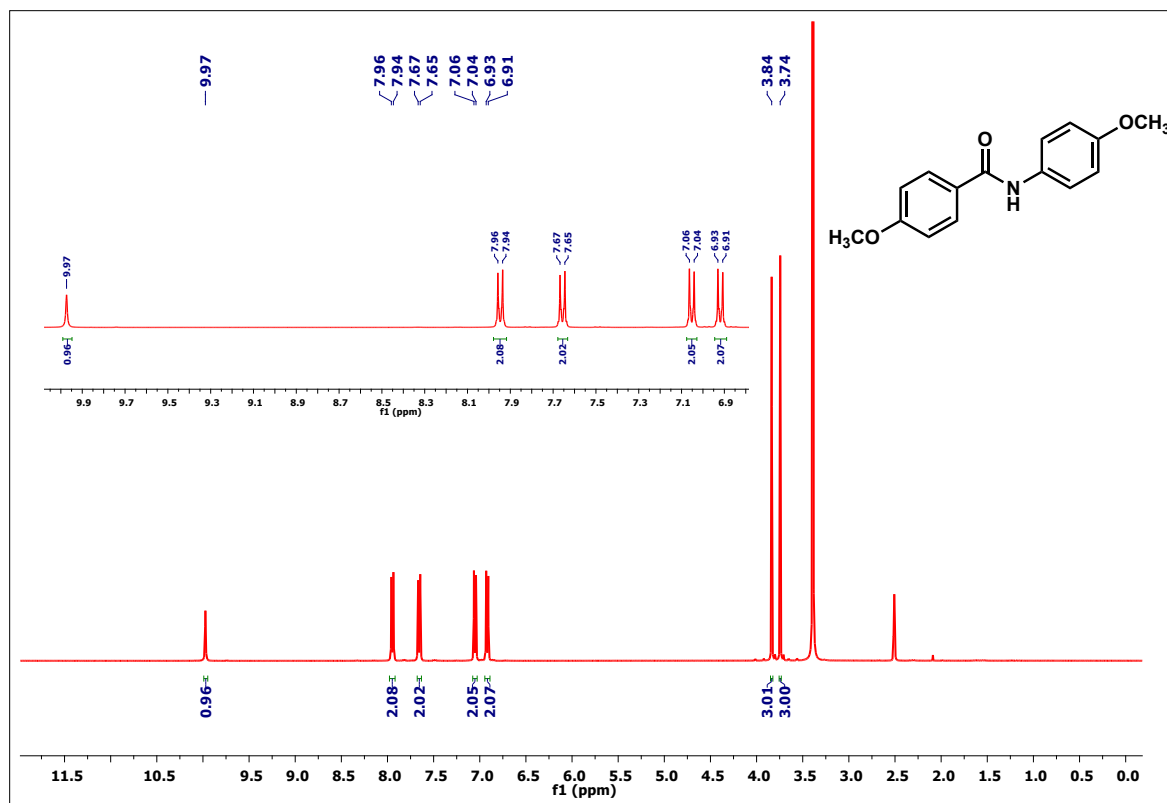

Figure S63: 400 MHz  $^1\text{H}$  NMR spectrum of **24** in  $\text{DMSO-d}_6$

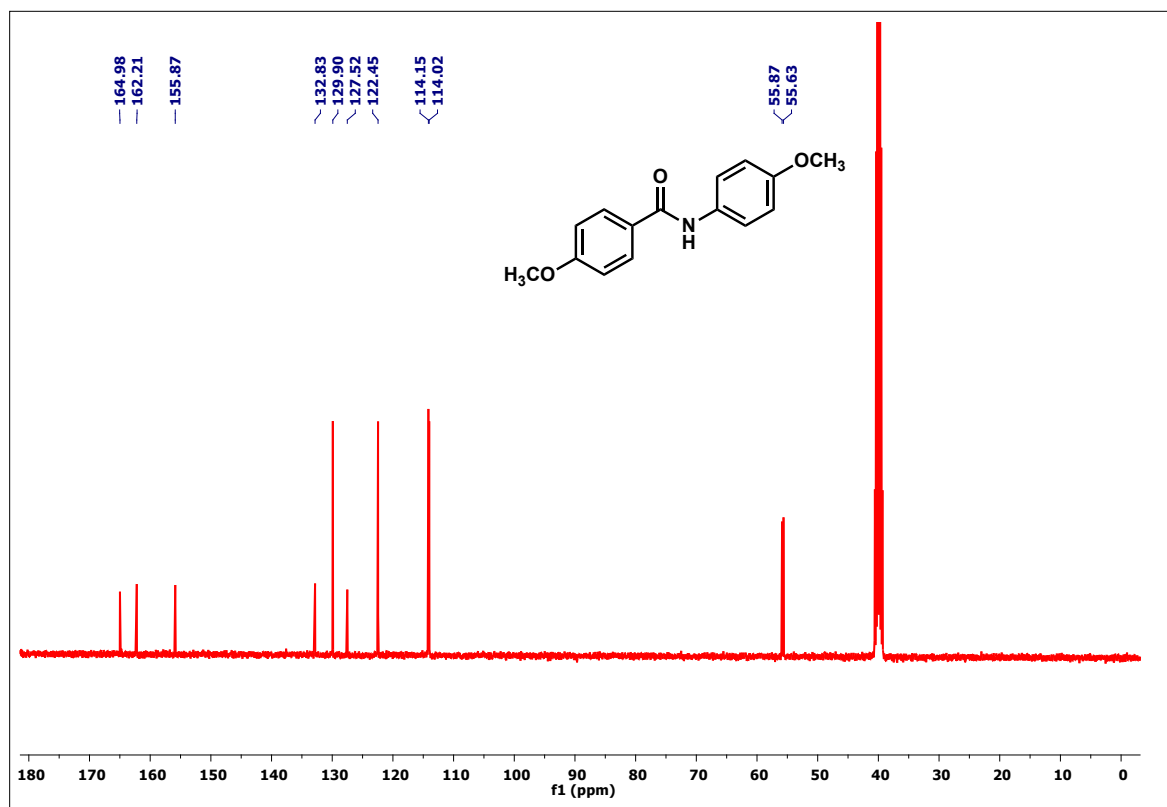

Figure S64: 100 MHz  $^{13}\text{C}$  NMR spectrum of **24** in  $\text{DMSO-d}_6$

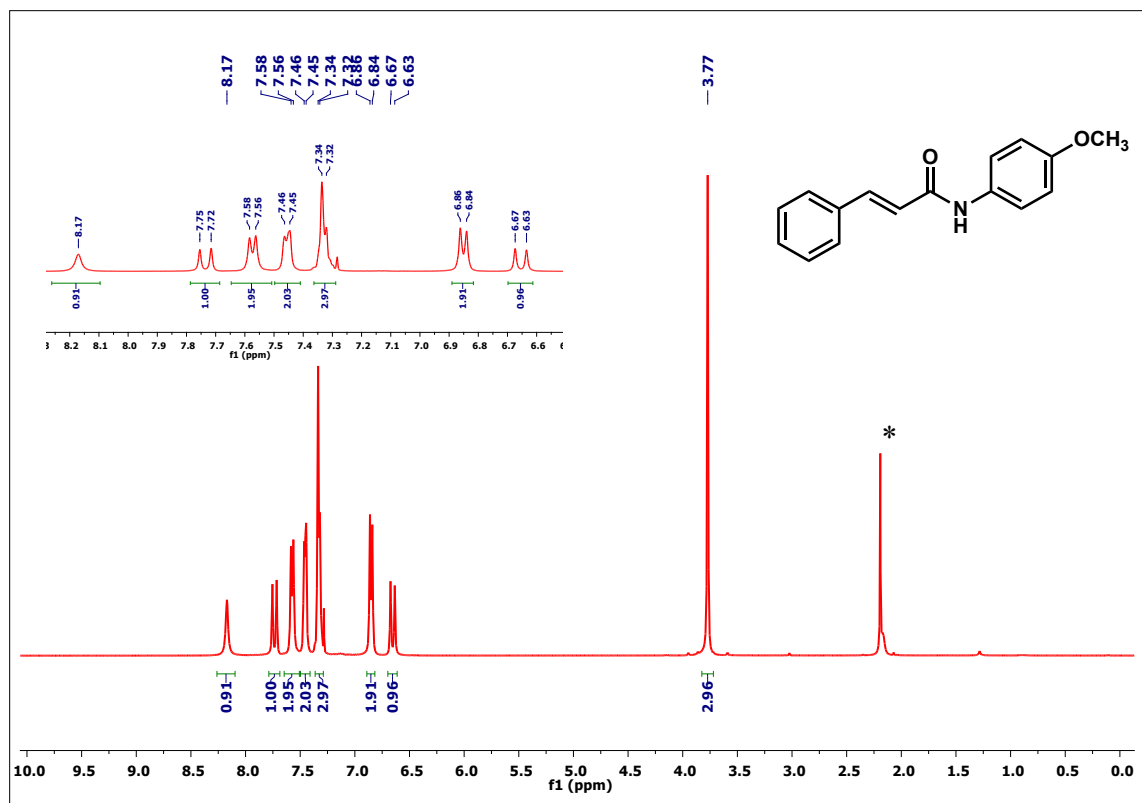

**Figure S65: 400 MHz <sup>1</sup>H NMR spectrum of **25** in CDCl<sub>3</sub>**

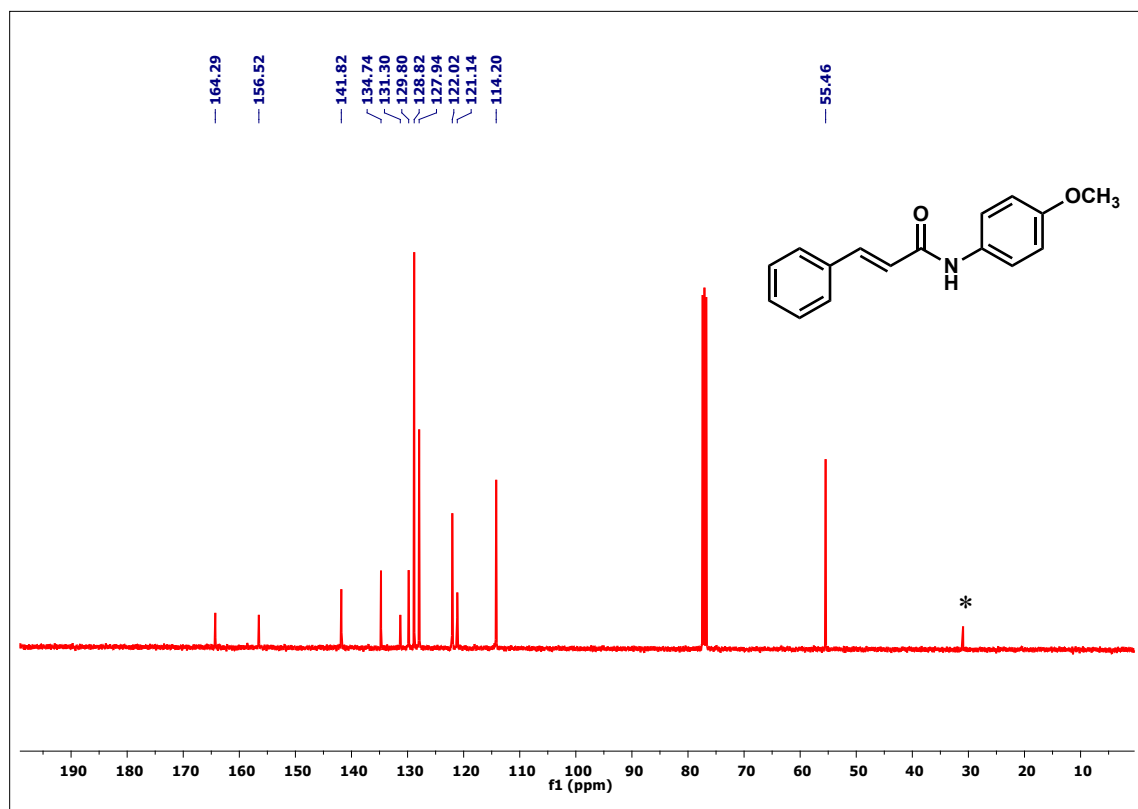

**Figure S66: 100 MHz <sup>13</sup>C NMR spectrum of **25** in CDCl<sub>3</sub>**

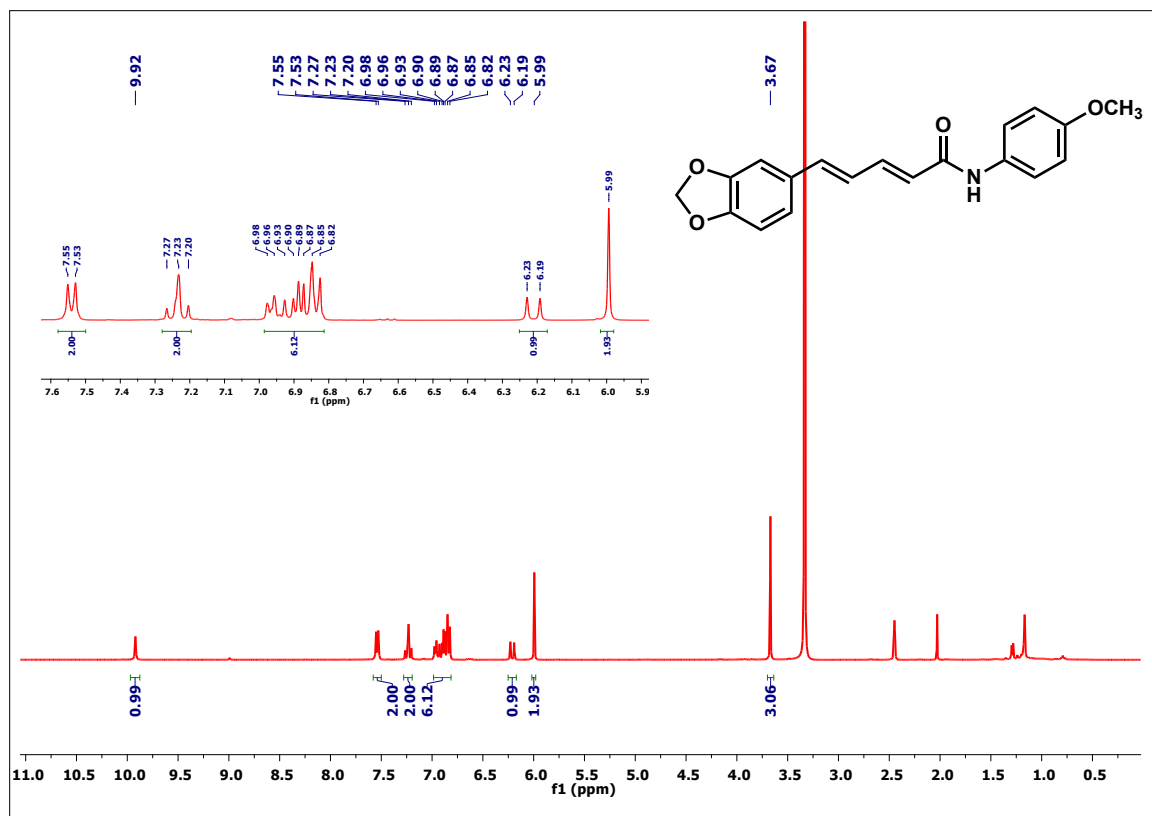

Figure S67: 400 MHz <sup>1</sup>H NMR spectrum of 26 DMSO-d<sub>6</sub>

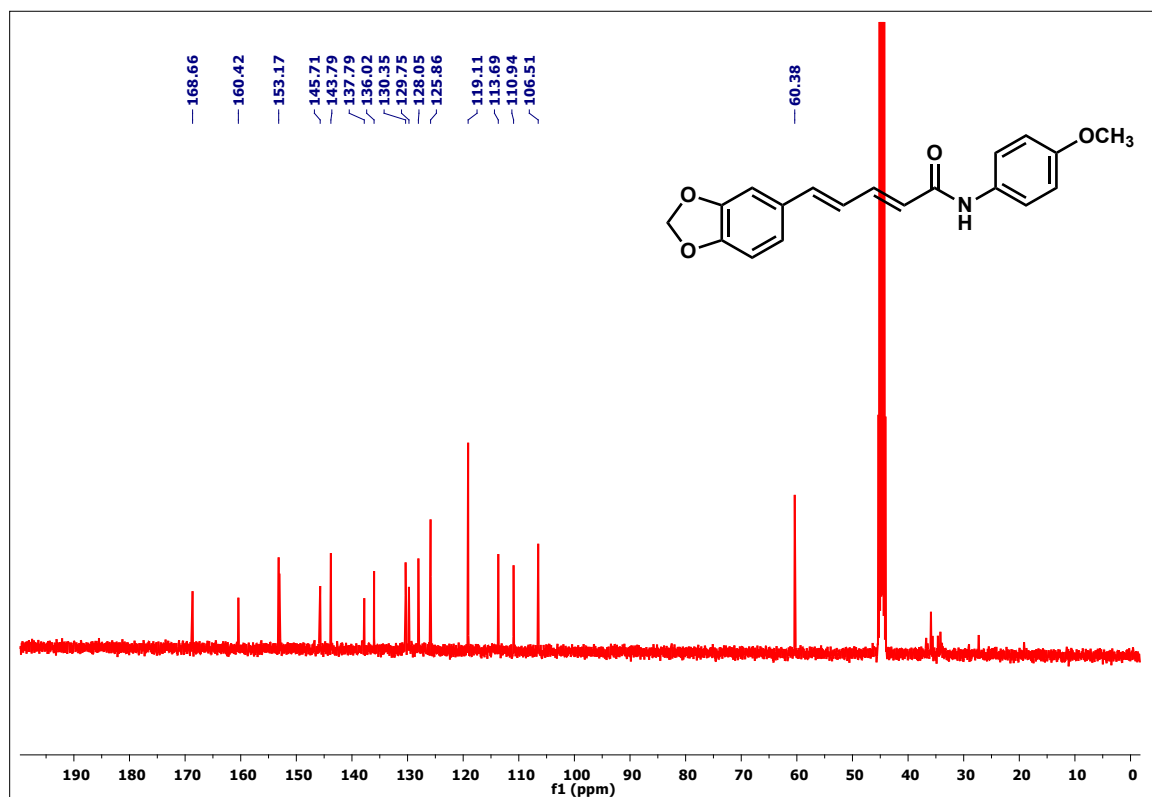

Figure S68: 100 MHz <sup>13</sup>C NMR spectrum of 26 DMSO-d<sub>6</sub>

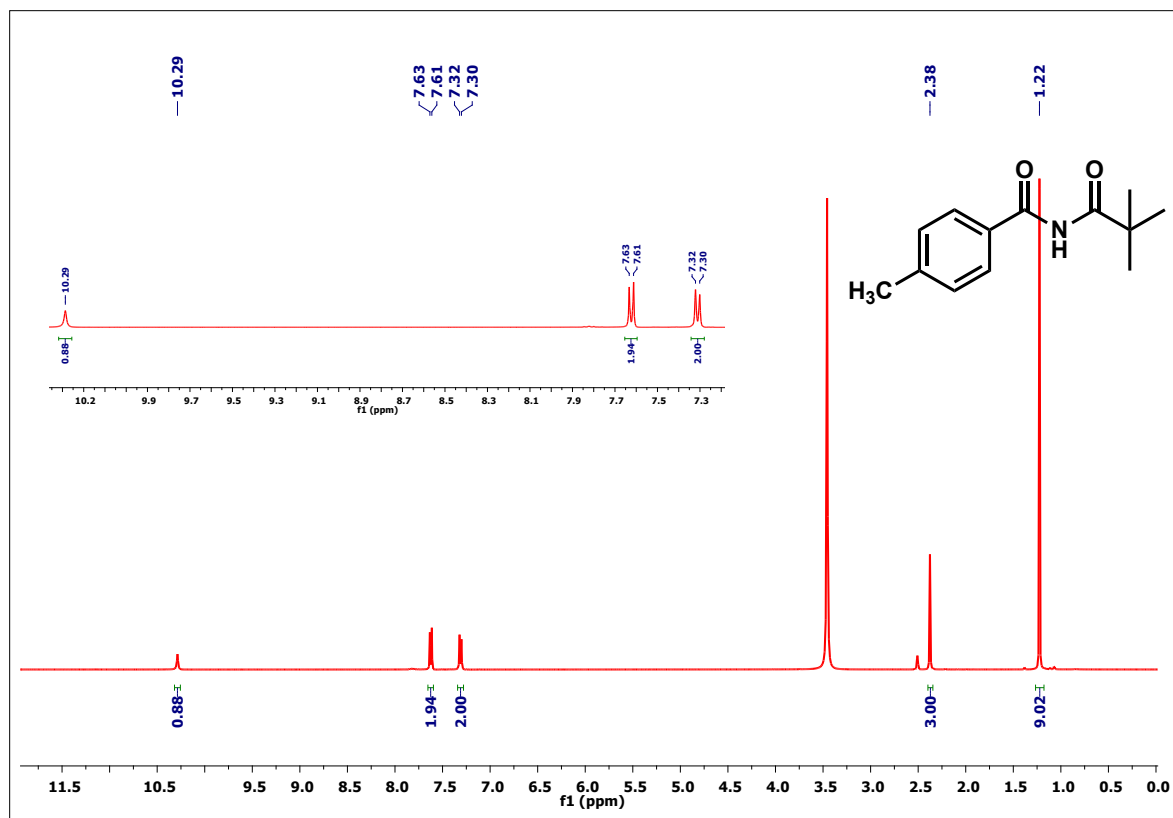

Figure S69: 400 MHz <sup>1</sup>H NMR spectrum of **27** in DMSO-d<sub>6</sub>

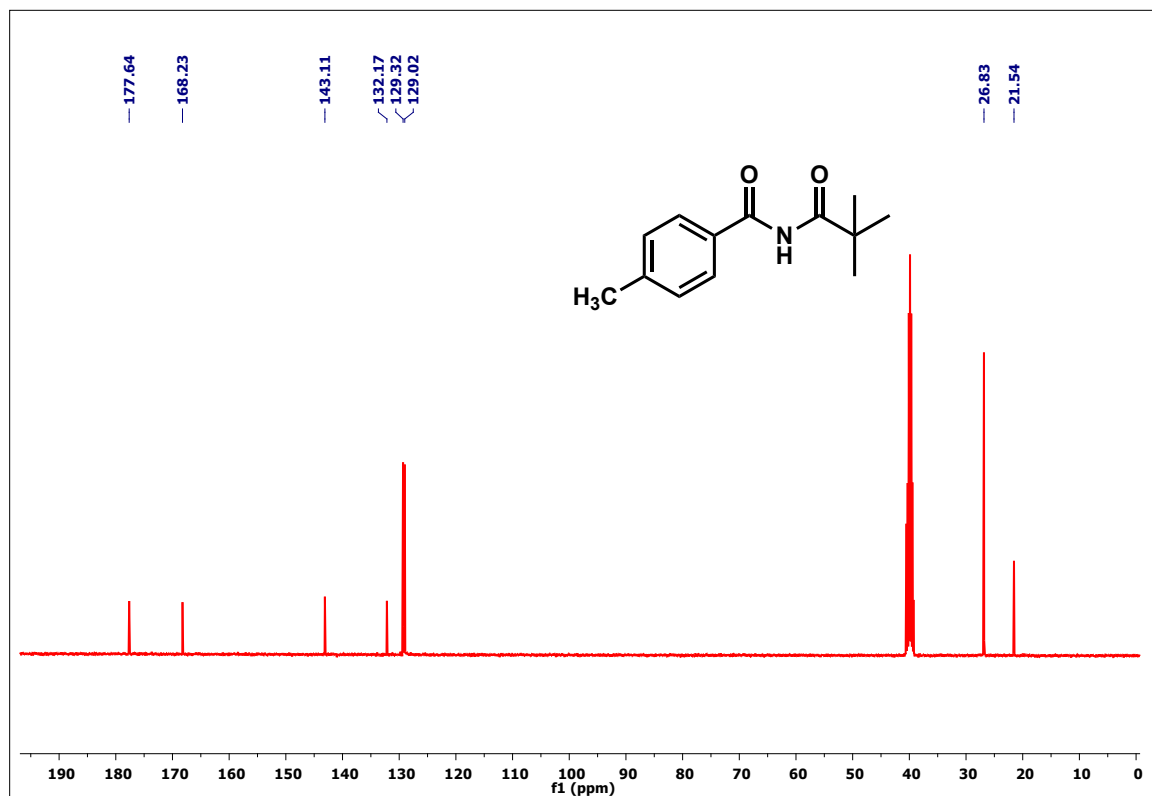

Figure S70: 100 MHz <sup>13</sup>C NMR spectrum of **27** in DMSO-d<sub>6</sub>

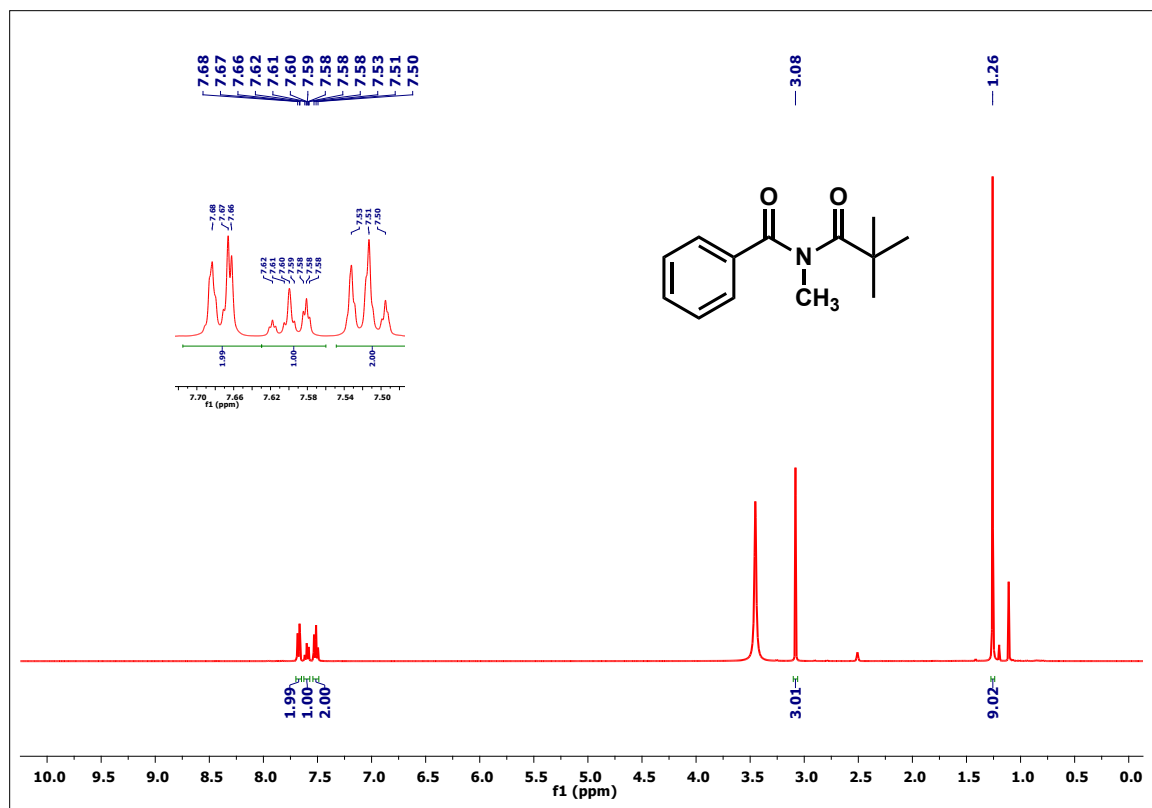

Figure S71: 400 MHz  $^1\text{H}$  NMR spectrum of **28** in  $\text{DMSO-d}_6$

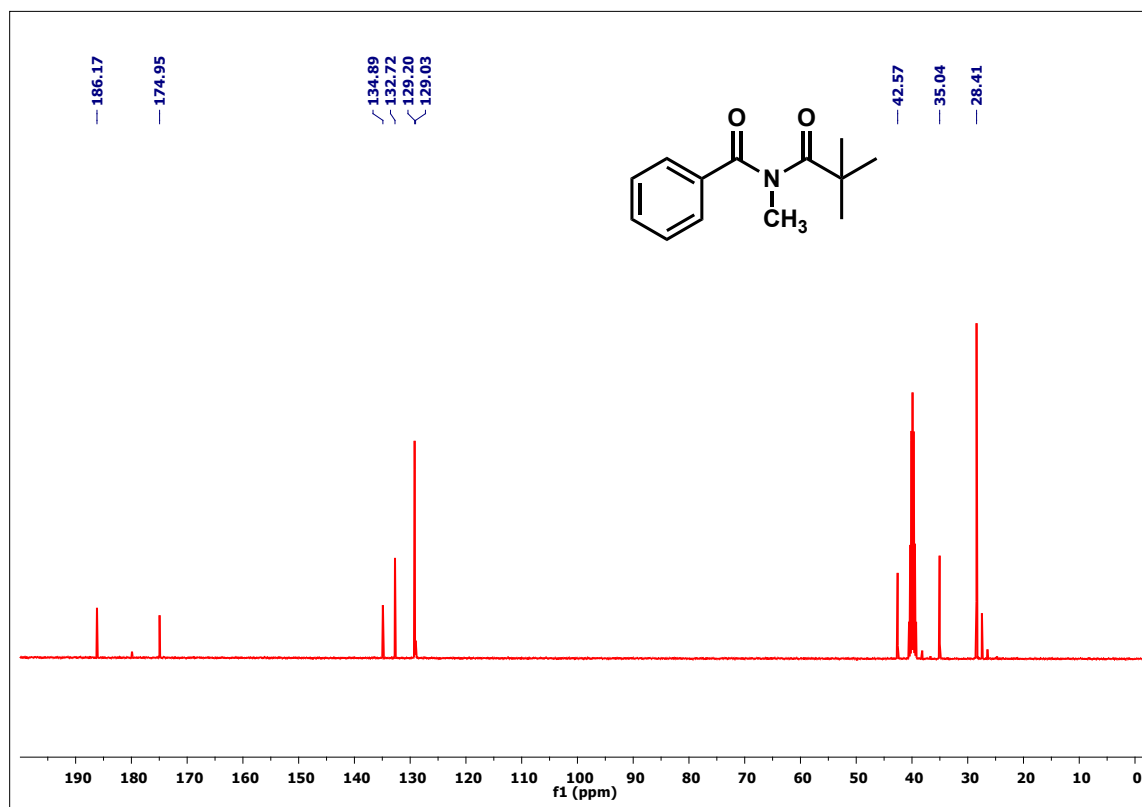

Figure S72: 100 MHz  $^{13}\text{C}$  NMR spectrum of **28** in  $\text{DMSO-d}_6$



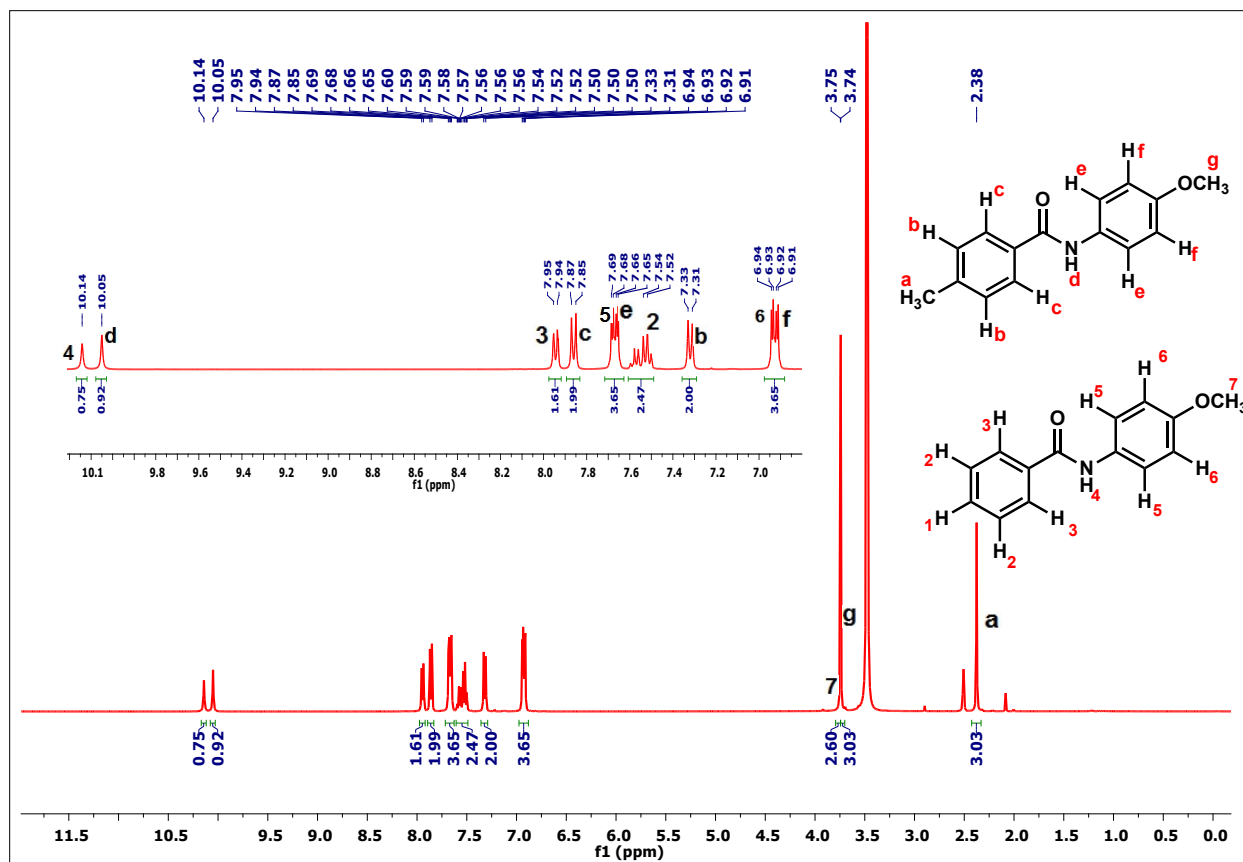

Figure S73: 400 MHz  $^1\text{H}$  NMR spectrum in DMSO- $d_6$  of competitive study
